# Supplementary material
Source: PubMed Central journal article supplement (PMC4364393)

# Supporting Information

## Structure diversification of vancomycin through peptide-catalyzed, site-selective lipidation: A catalysis-based approach to combat glycopeptide-resistant pathogens

Sabesan Yoganathan<sup>a,b</sup> and Scott J. Miller<sup>a,\*</sup>

<sup>a</sup>*Department of Chemistry, Yale University, P.O. Box 208107, New Haven, CT 06520-8107*

<sup>b</sup>*Department of Pharmaceutical Sciences, St. John's University, 8000 Utopia Pkwy, Queens, NY 11439*

\*To whom correspondence should be addressed. e-mail: scott.miller@yale.edu

<sup>b</sup> current address

### Supporting Information Contents:

|       |                                                                                     |      |
|-------|-------------------------------------------------------------------------------------|------|
| I.    | Synthesis of partially protected vancomycin derivative <b>3</b>                     | S-2  |
| II.   | Screening of peptide catalysts for the decanoylation reaction                       | S-4  |
| III.  | Synthesis of G <sub>6</sub> -decanoyl vancomycin derivative <b>9a</b>               | S-7  |
| IV.   | Synthesis of G <sub>4</sub> -decanoyl vancomycin derivative <b>9b</b>               | S-10 |
| V.    | Synthesis of Z <sub>6</sub> -decanoyl vancomycin derivative <b>9c</b>               | S-13 |
| VI.   | Synthesis of G <sub>4</sub> -acyl vancomycin derivatives <b>10-15</b>               | S-16 |
| VII.  | Synthesis of peptide catalysts                                                      | S-19 |
| VIII. | Acyl group migration studies                                                        | S-20 |
| IX.   | Competition experiments with Boc-Leu- <sup>D</sup> Ala- <sup>D</sup> Ala-OH         | S-22 |
| X.    | Antibacterial activity assay for determining minimum Inhibitory Concentration (MIC) | S-24 |
| XI.   | NMR spectra                                                                         | S-25 |

## I. Synthesis of partially protected vancomycin derivative 3

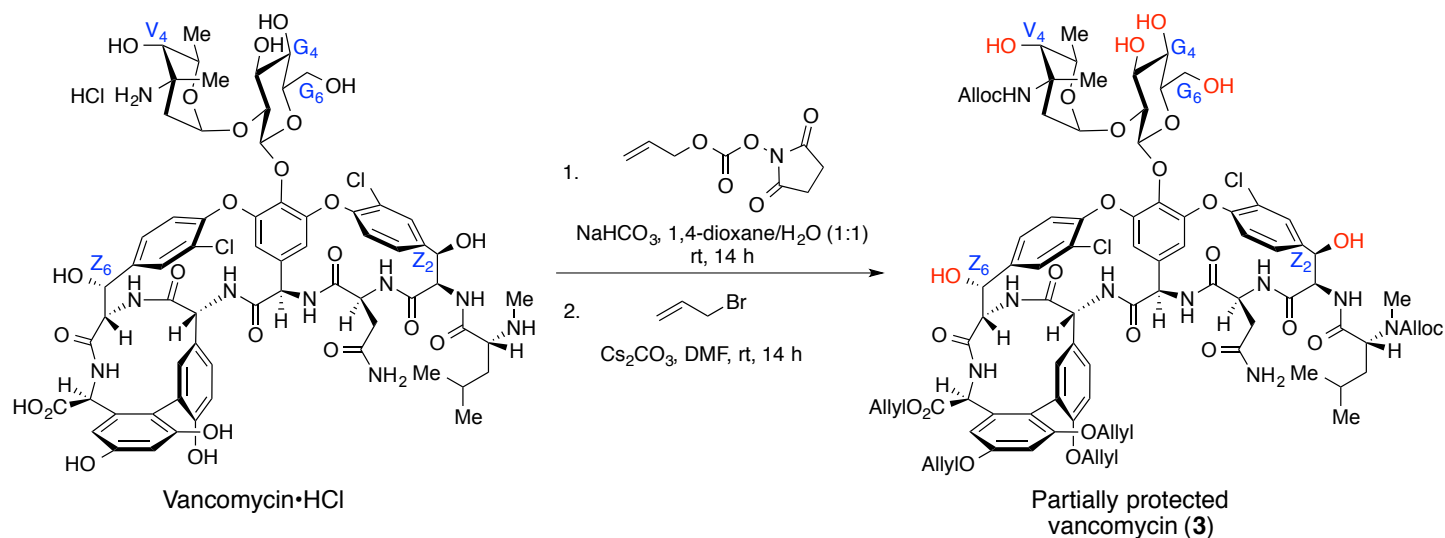

Partially protected vancomycin **3** was synthesized using reported literature procedures.<sup>1,2</sup> Compound **3** was purified using Biotage (RP-MPLC, Method 6). RP-HPLC retention time (Method 3): 24.9 min; LC-MS (ESI<sup>+</sup>) for  $\text{C}_{86}\text{H}_{100}\text{Cl}_2\text{N}_9\text{O}_{28}$   $[\text{M}+\text{H}]^+$ : Calc'd = 1776.605; found = 1776.615.

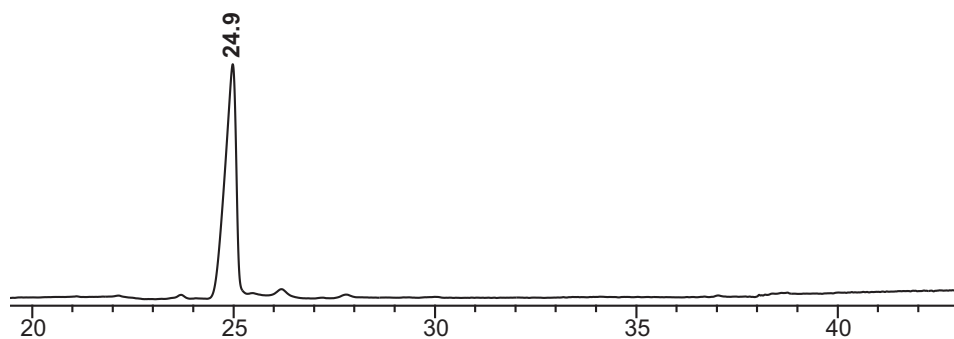

HPLC Trace of alloc/allyl protected vancomycin (**3**): RP-HPLC Method 3,  $\lambda = 220$  nm,  $t_R = 24.8$  min.

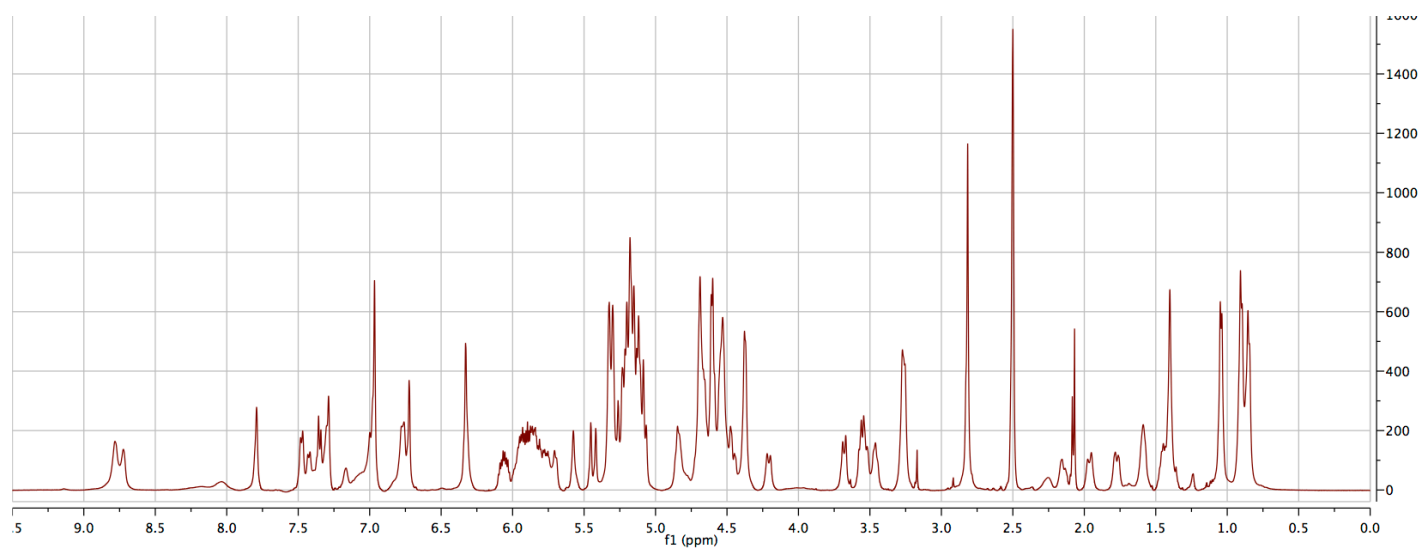

<sup>1</sup>H NMR spectrum of alloc/allyl-protected vancomycin in  $\text{DMSO-d}_6$

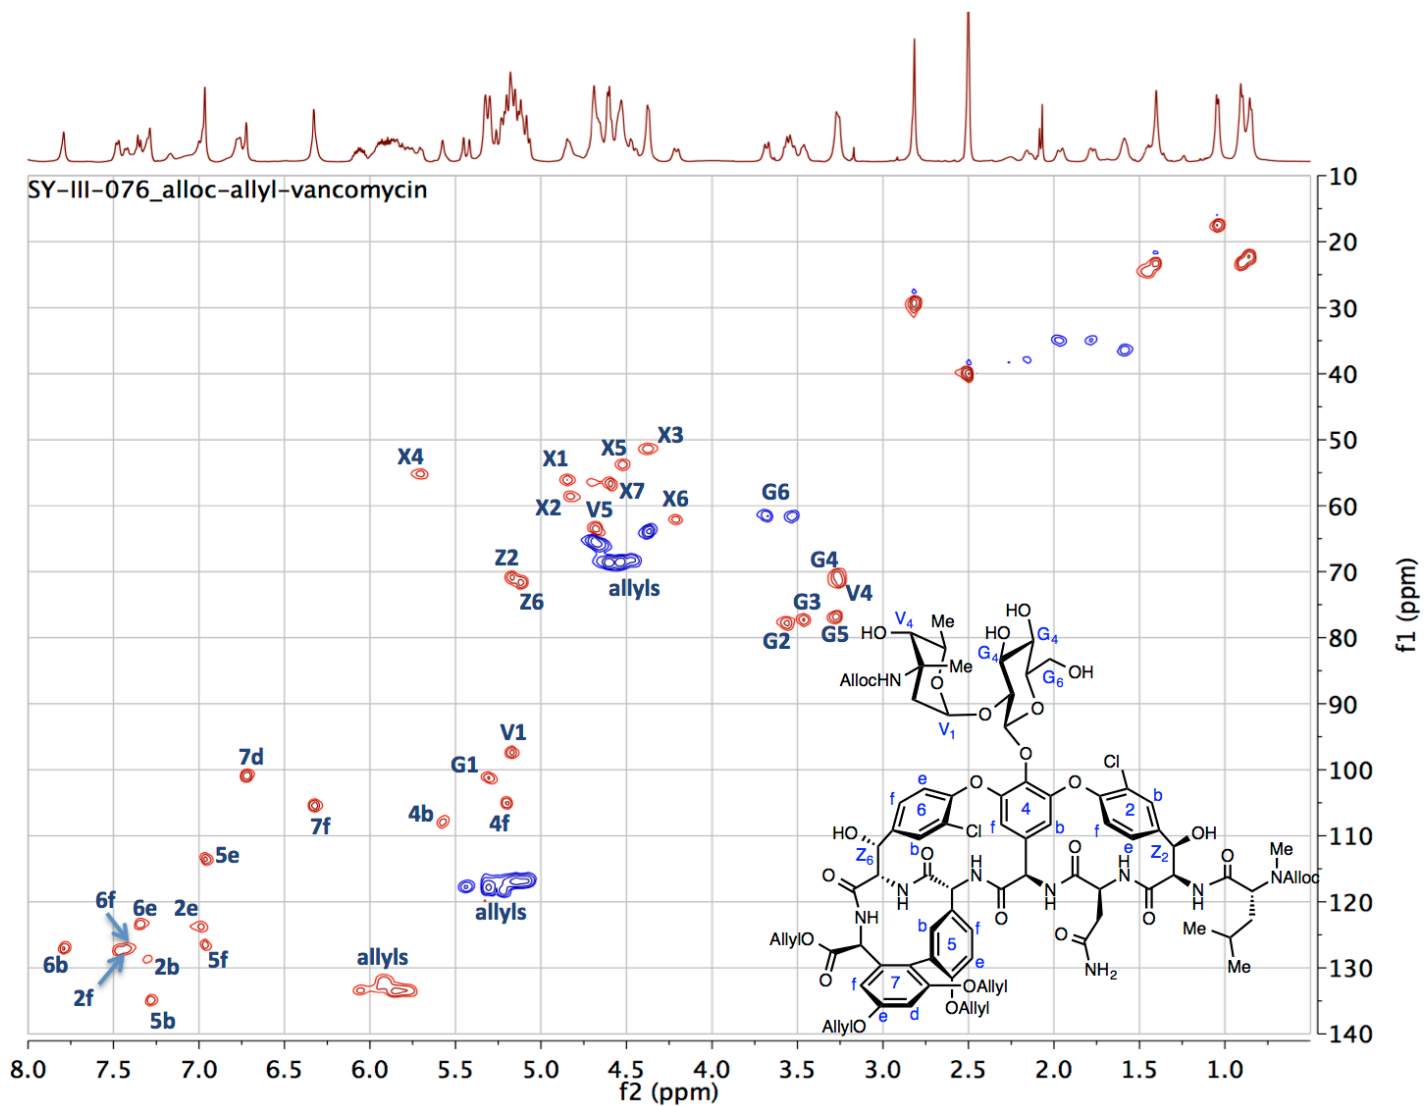

## II. Screening of peptide catalysts for the decanoylation of **3**

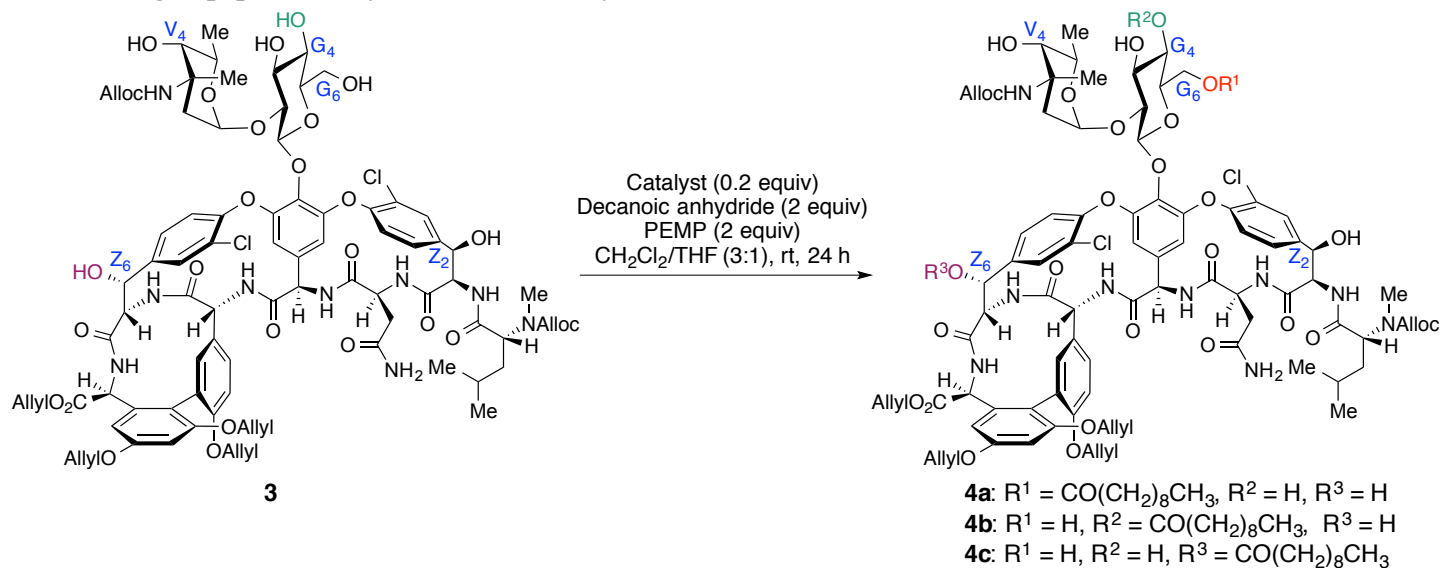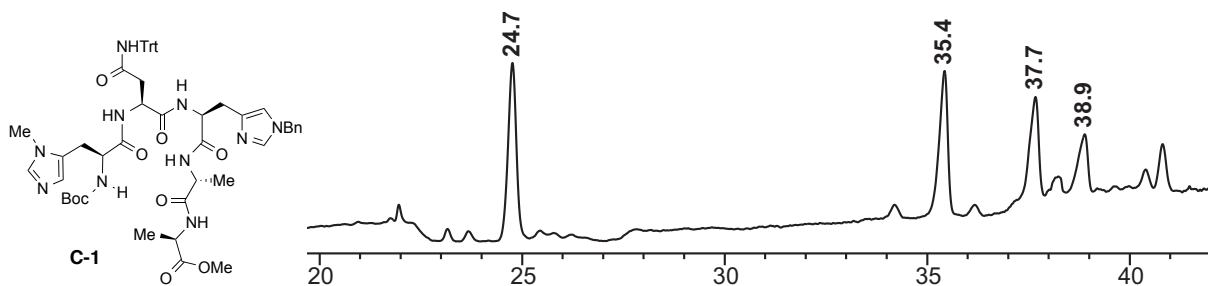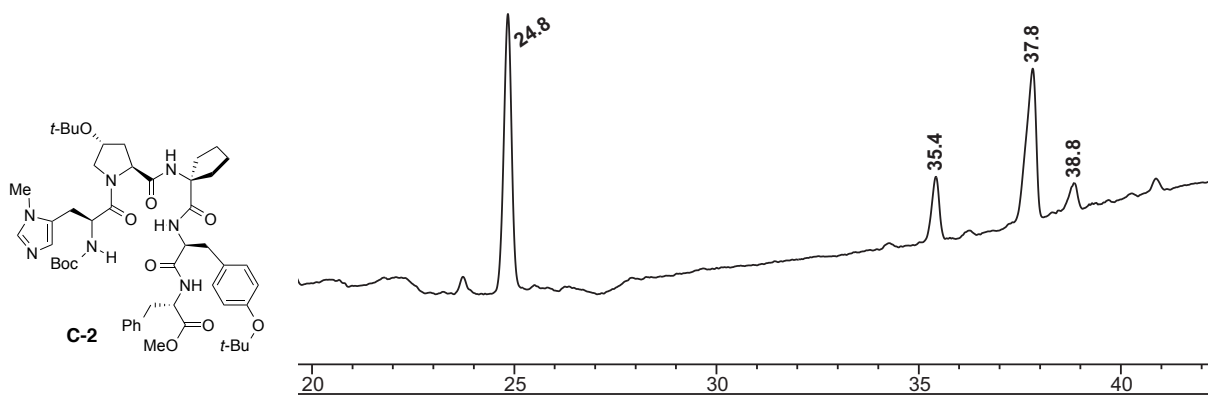

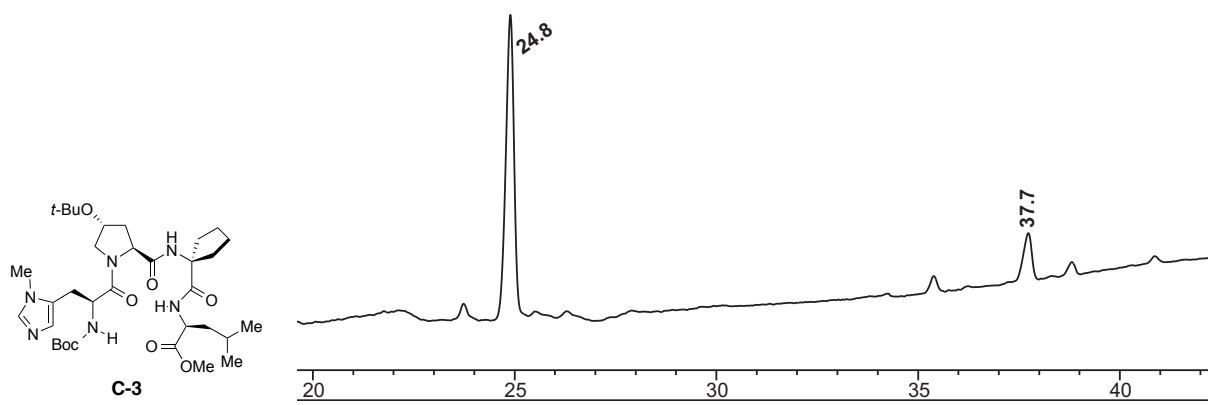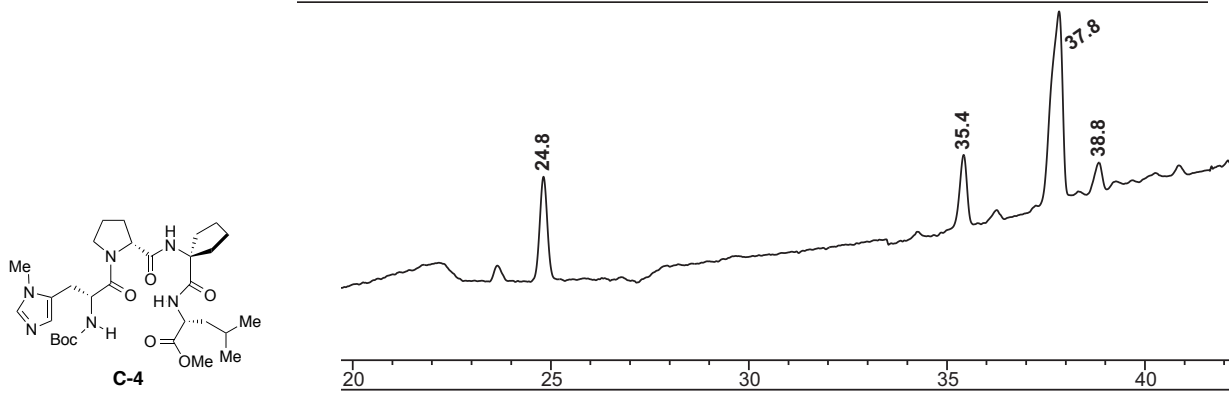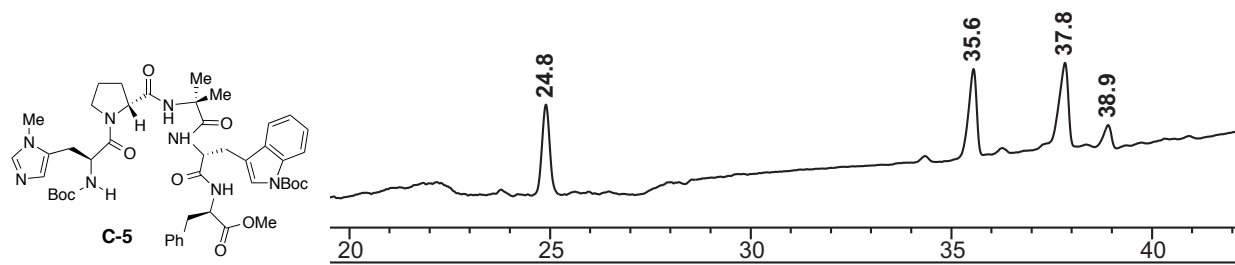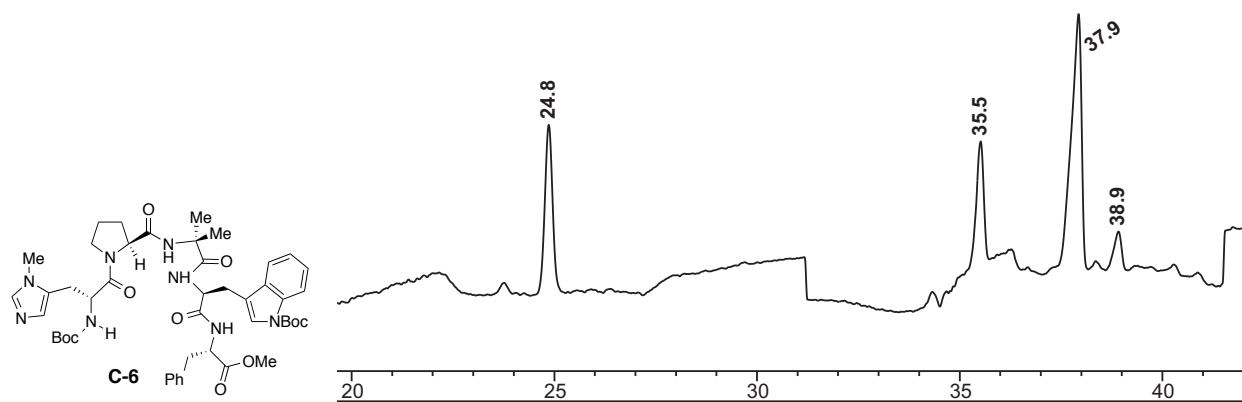

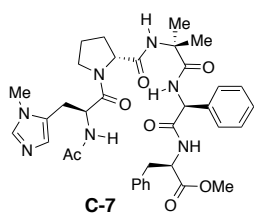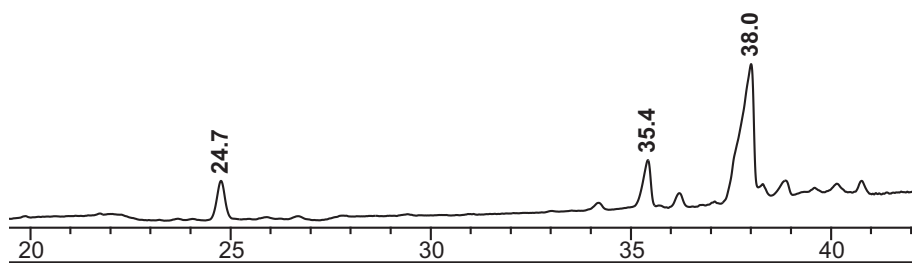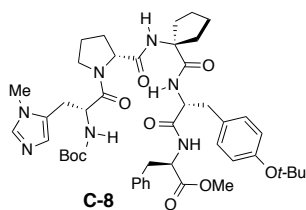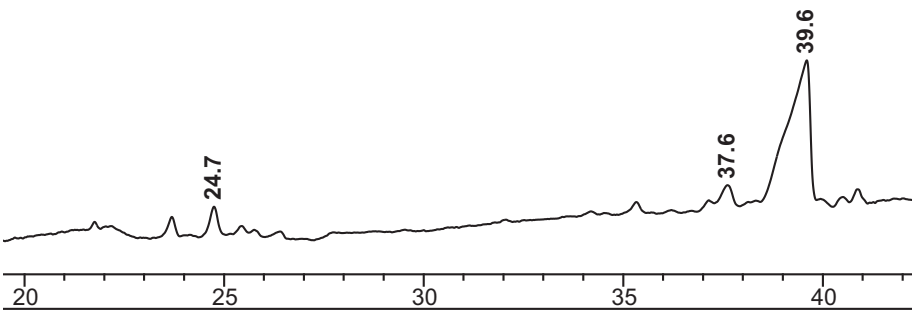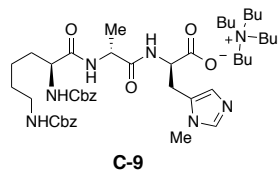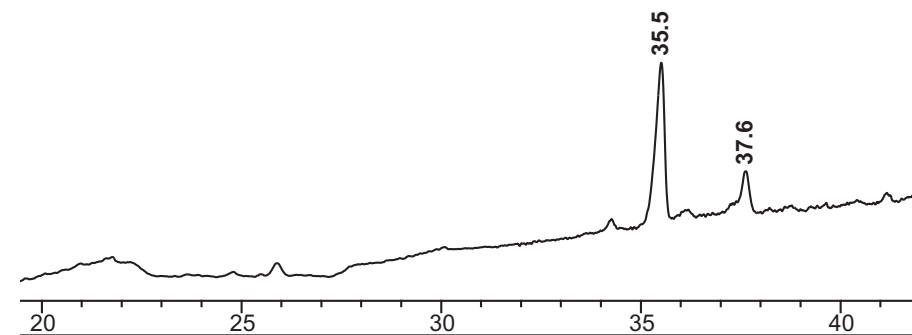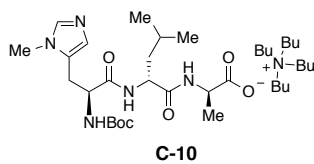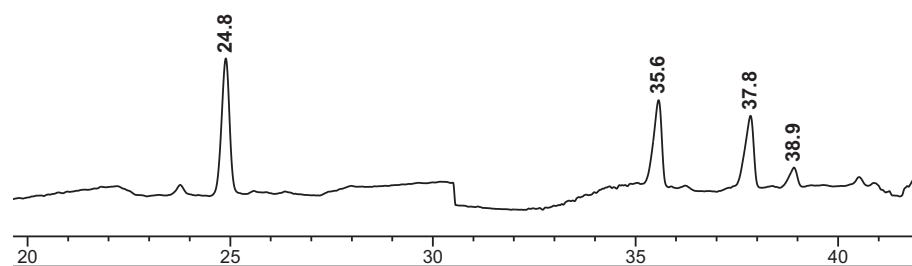

### III. Synthesis of G<sub>6</sub>-decanoyl vancomycin derivative 9a

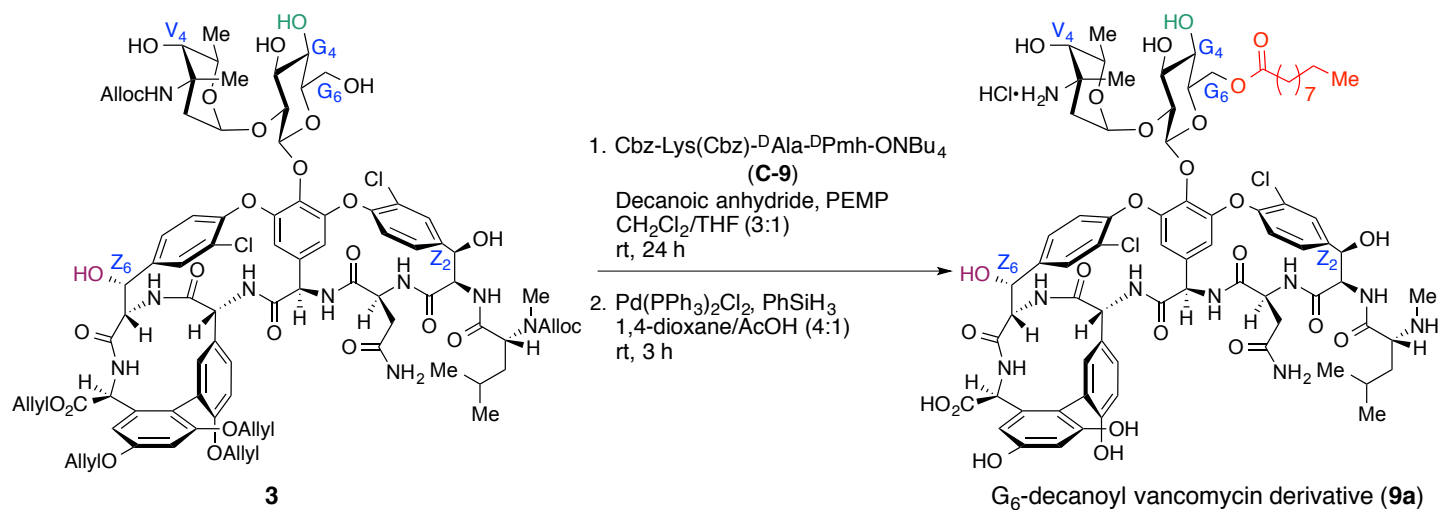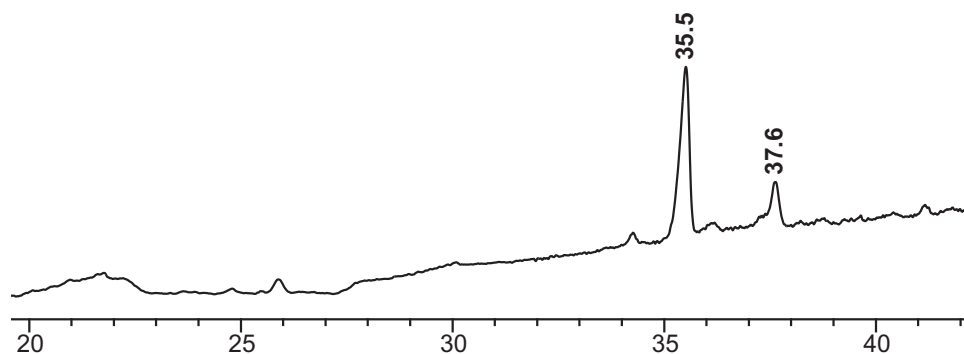

**HPLC Trace of G<sub>6</sub>-selective decanoylation reaction:** RP-HPLC Method 3,  $\lambda = 220$  nm,  $t_R$  (**4a**) = 35.5 min;  $t_R$  (protected G<sub>4</sub>-decanoyl vancomycin, **4b**) = 37.6 min.

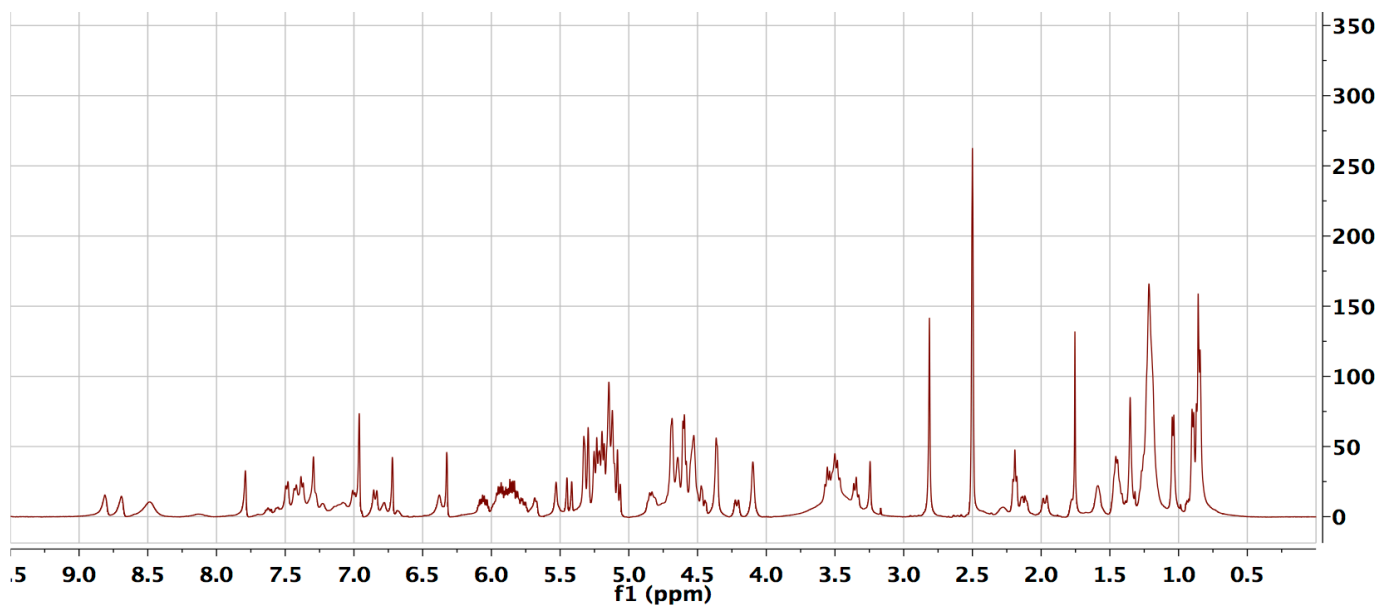

**<sup>1</sup>H NMR spectrum of protected G<sub>6</sub>-decanoyl vancomycin in DMSO-d<sub>6</sub>**

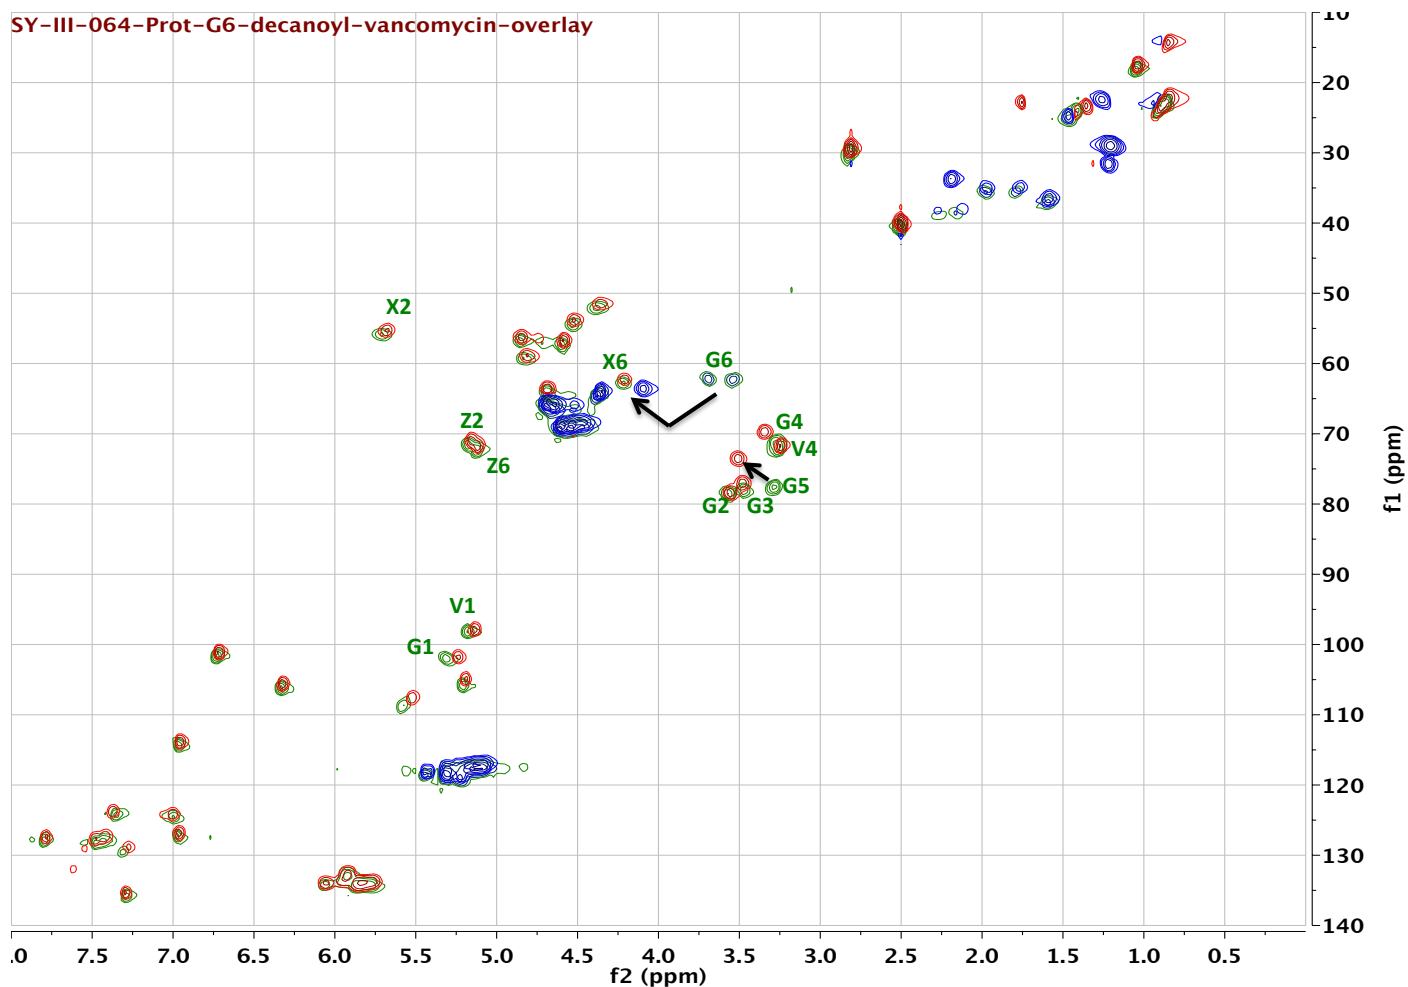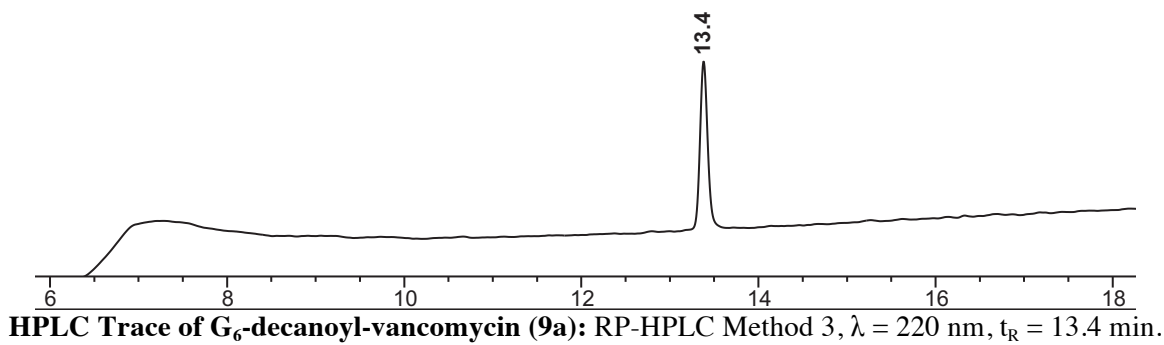



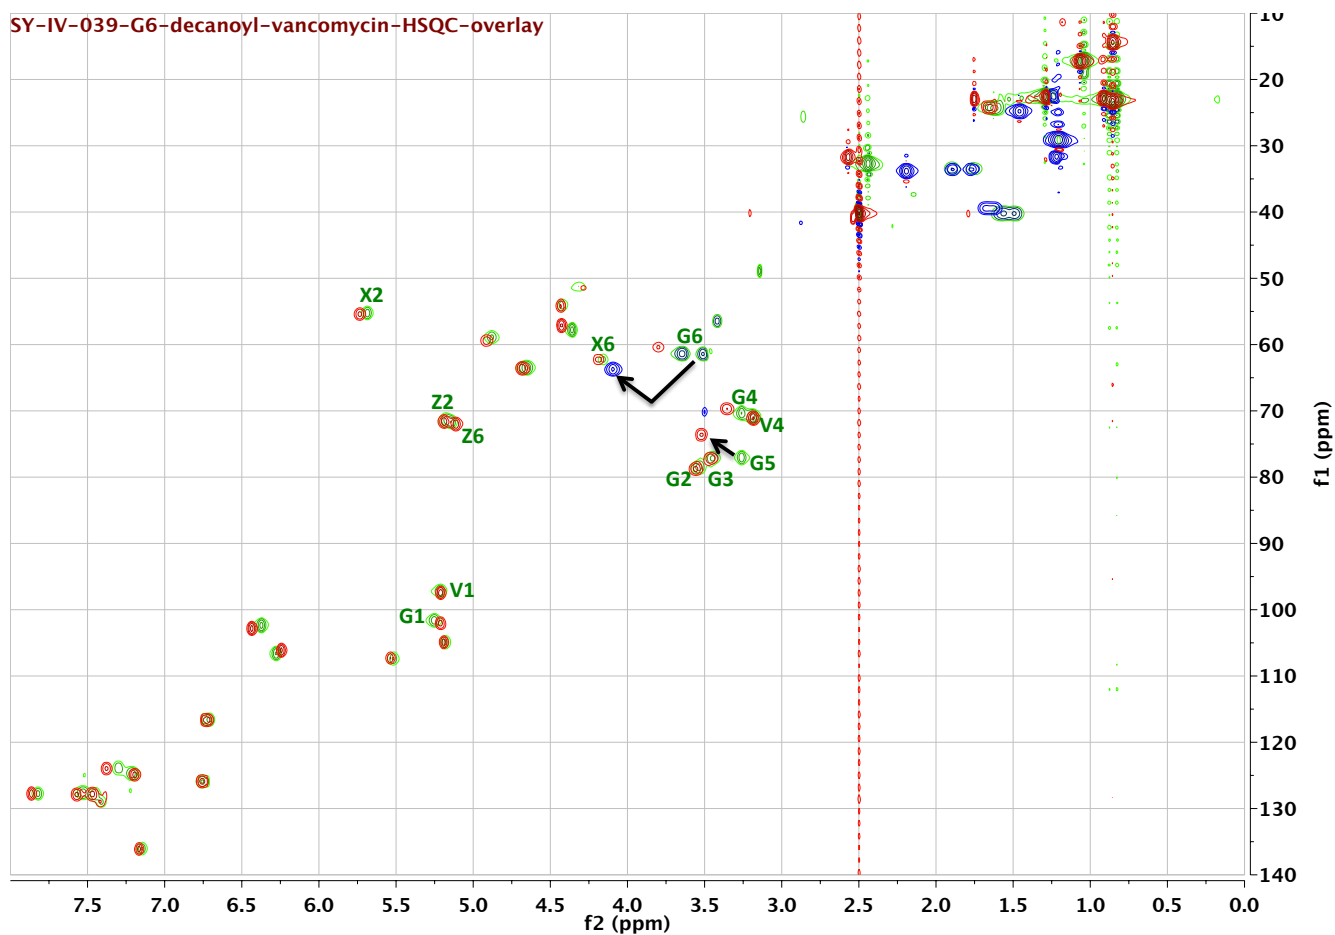

**HSQC-NMR spectrum of G<sub>6</sub>-decanoyl vancomycin (9a) in DMSO-d<sub>6</sub>. [HSQC spectrum of native vancomycin is colored in green, and HSQC spectrum of decanoyl-vancomycin derivative is colored in red and blue]**

#### IV. Synthesis of G<sub>4</sub>-decanoyl vancomycin derivative 9b

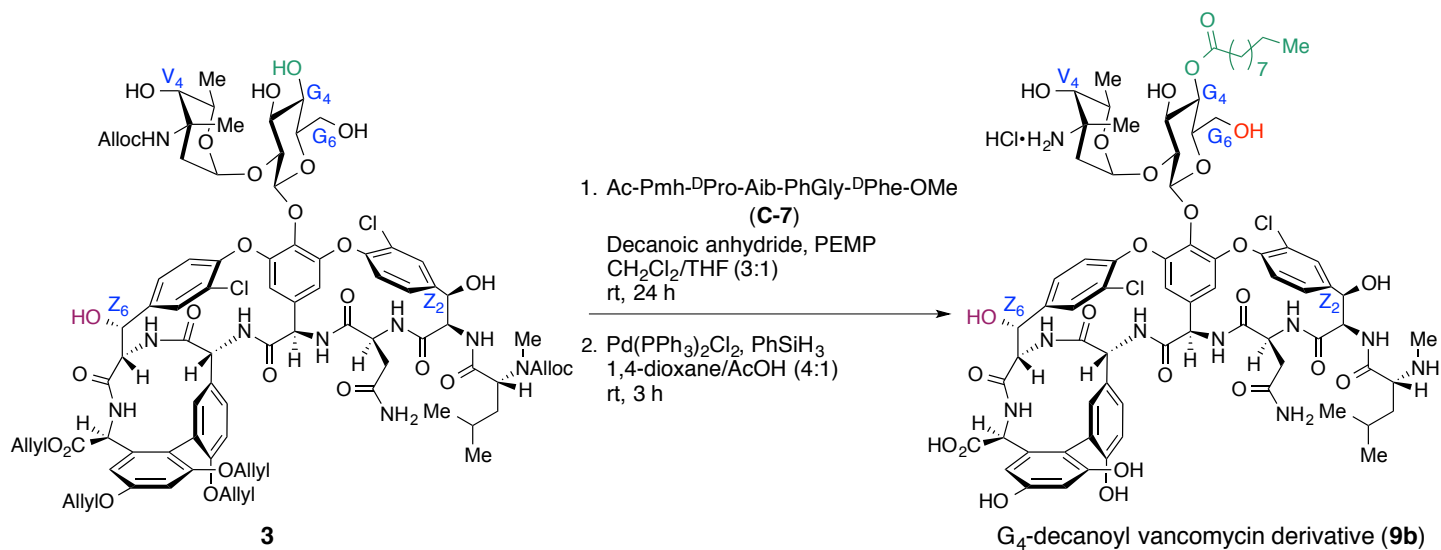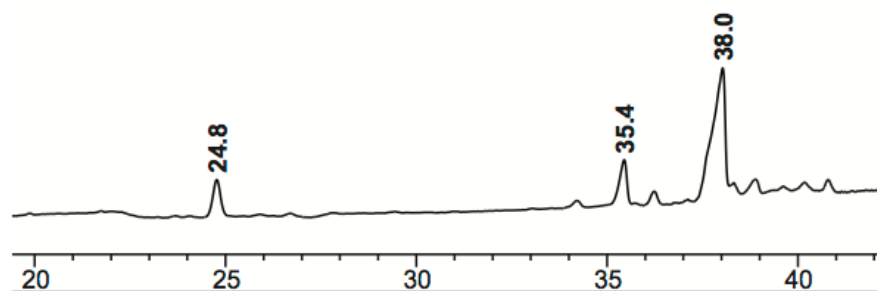

**HPLC Trace of G<sub>4</sub>-selective decanoylation reaction:** RP-HPLC Method 3,  $\lambda = 220$  nm,  $t_R$  (**3**) = 24.8 min;  $t_R$  (protected G<sub>6</sub>-decanoyl vancomycin, **4a**) = 35.4 min;  $t_R$  (protected G<sub>4</sub>-decanoyl vancomycin, **4b**) = 38.0 min.

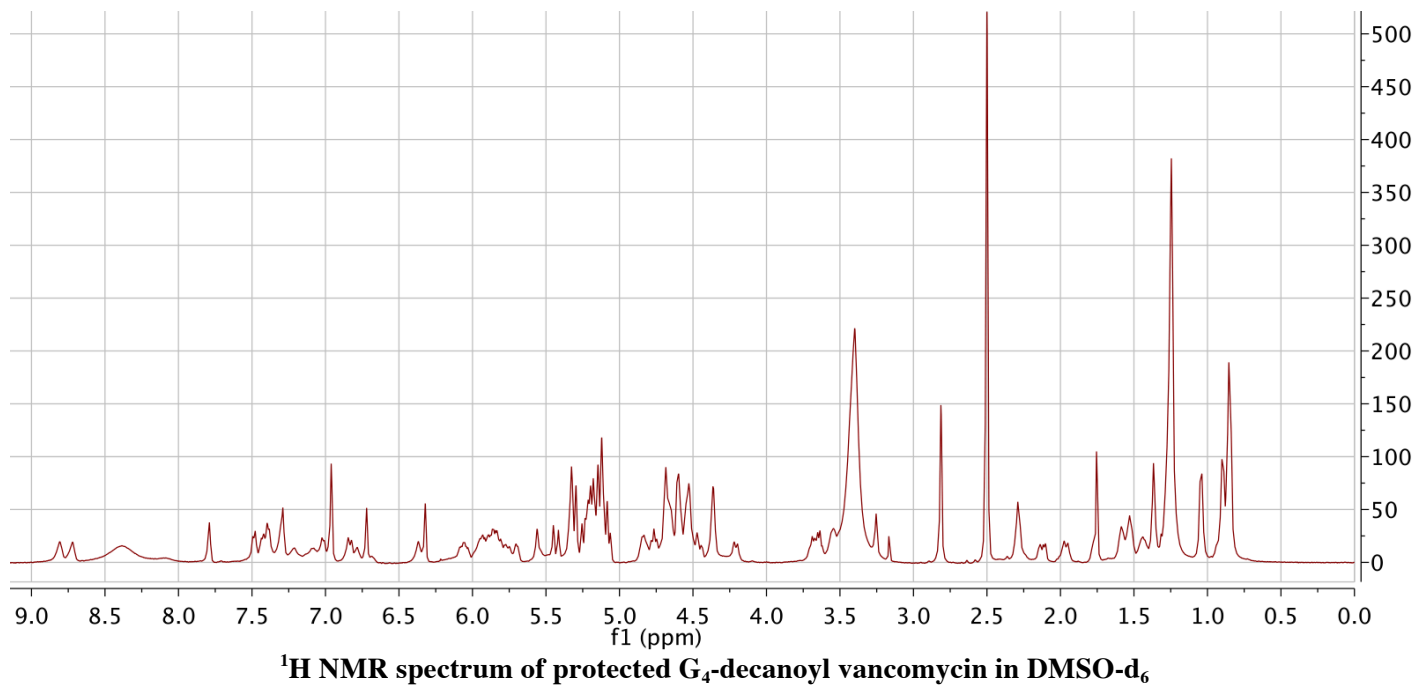

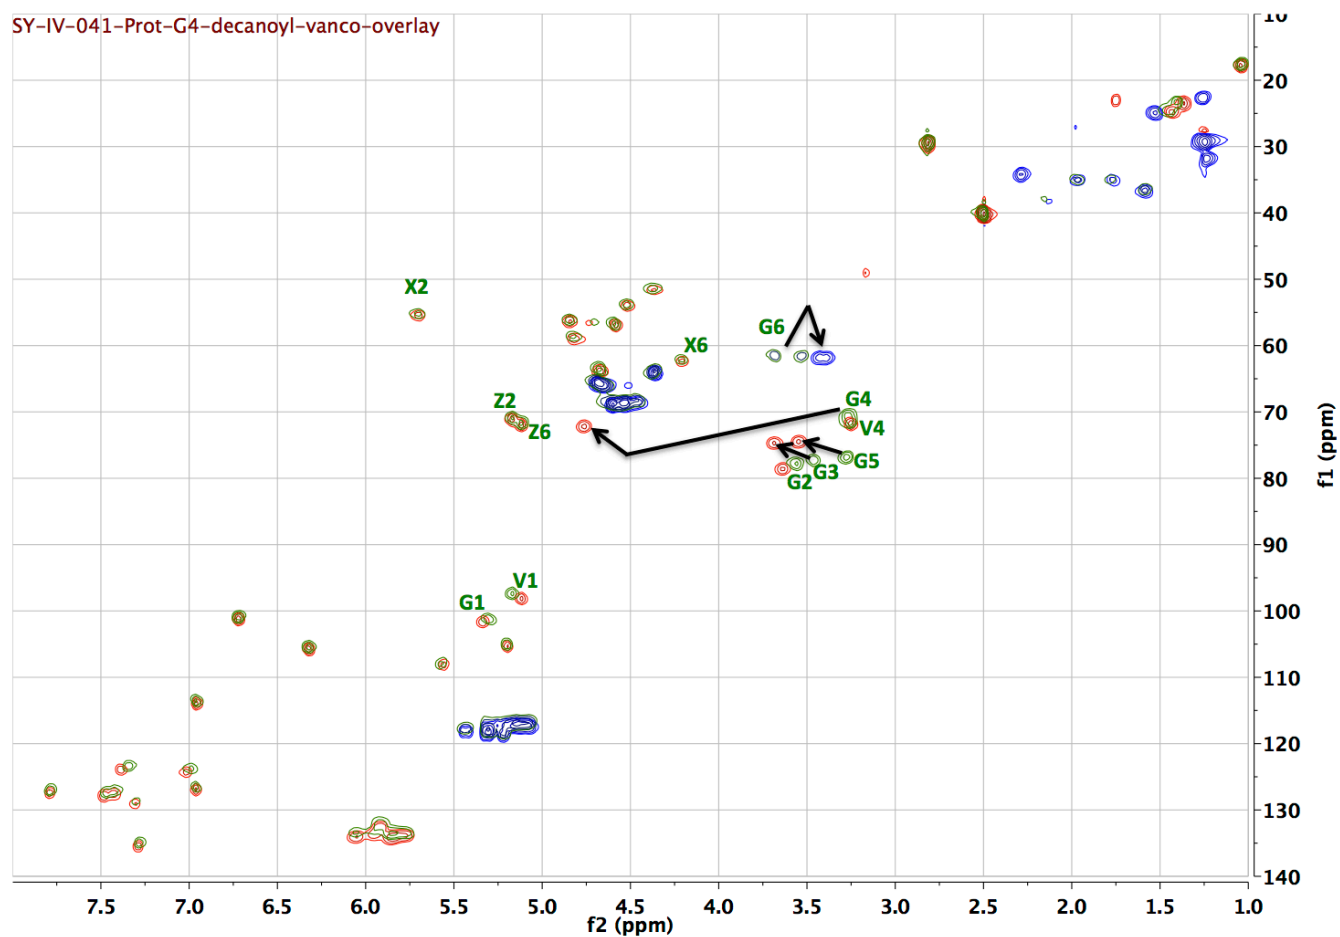

HSQC-NMR spectrum of protected G<sub>4</sub>-decanoyl vancomycin in DMSO-d<sub>6</sub>. [HSQC spectrum of native vancomycin is colored in green, and HSQC spectrum of decanoyl-vancomycin derivative is colored in red and blue]

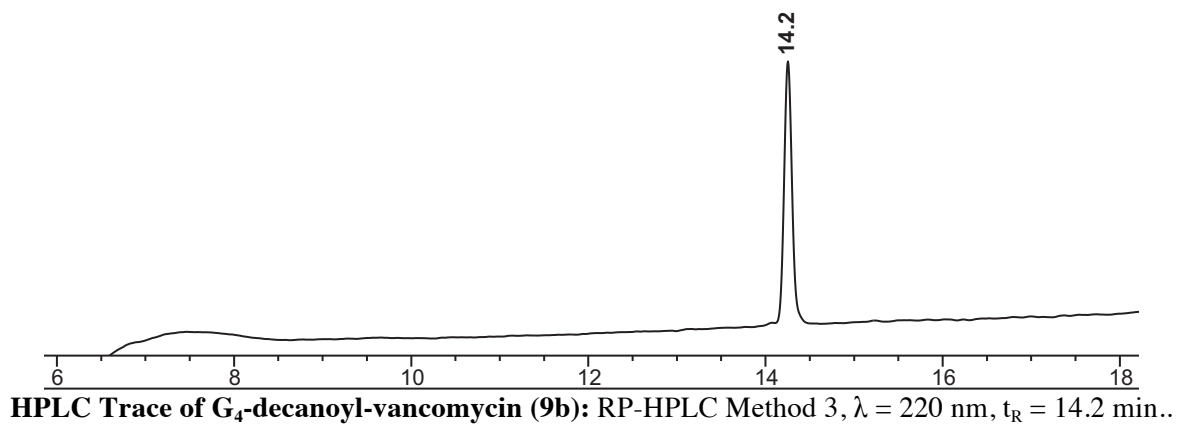

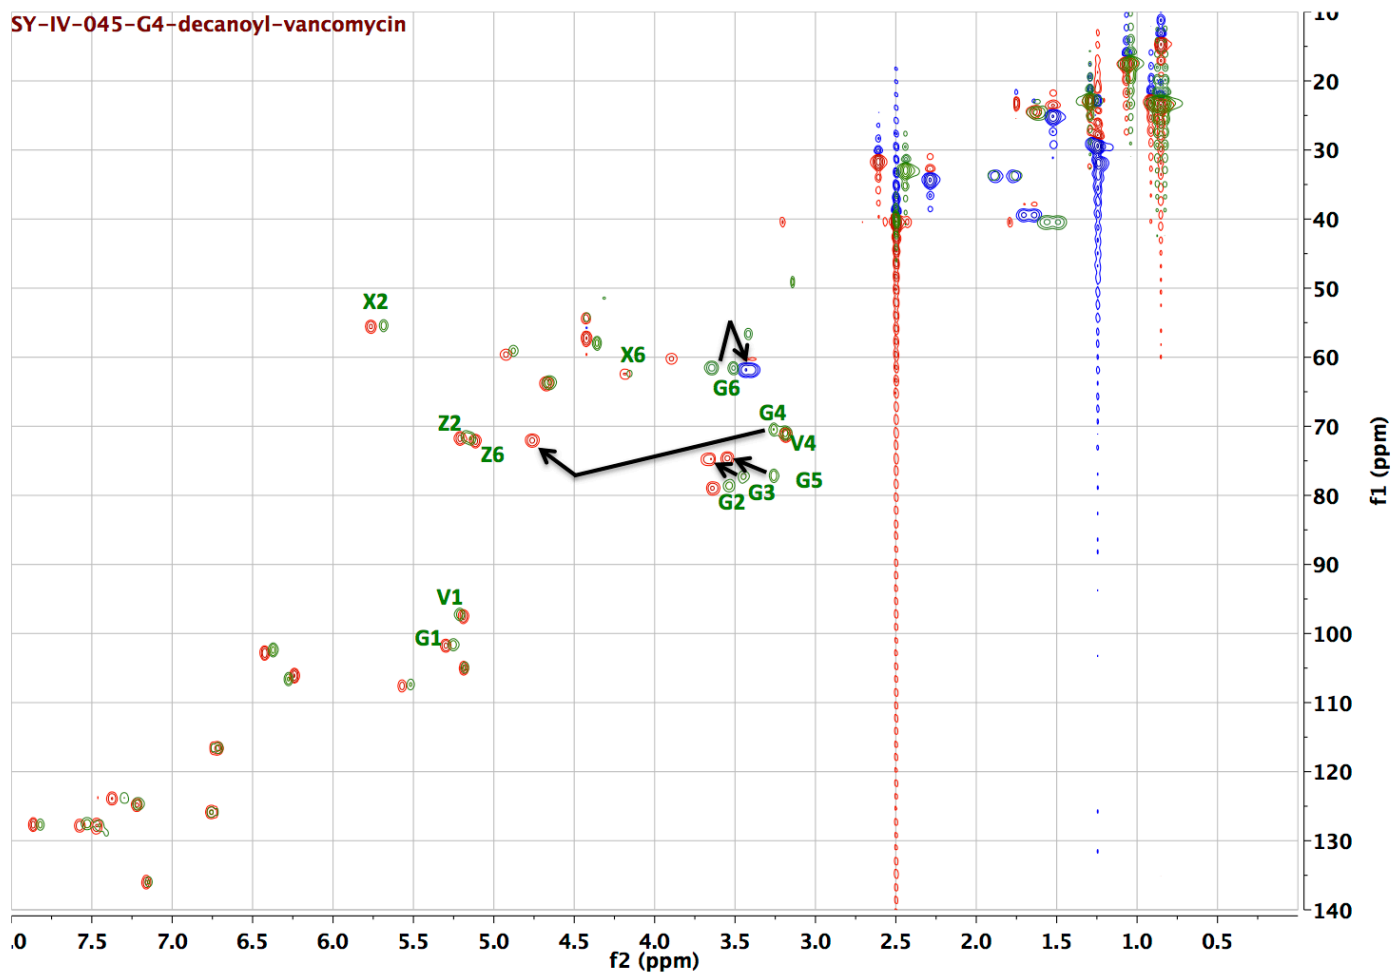

**HSQC-NMR spectrum of G<sub>4</sub>-decanoyl vancomycin (9b) in DMSO-d<sub>6</sub>. [HSQC spectrum of native vancomycin is colored in green, and HSQC spectrum of decanoyl-vancomycin derivative is colored in red and blue]**

## V. Synthesis of Z<sub>6</sub>-decanoyl vancomycin derivative 9c

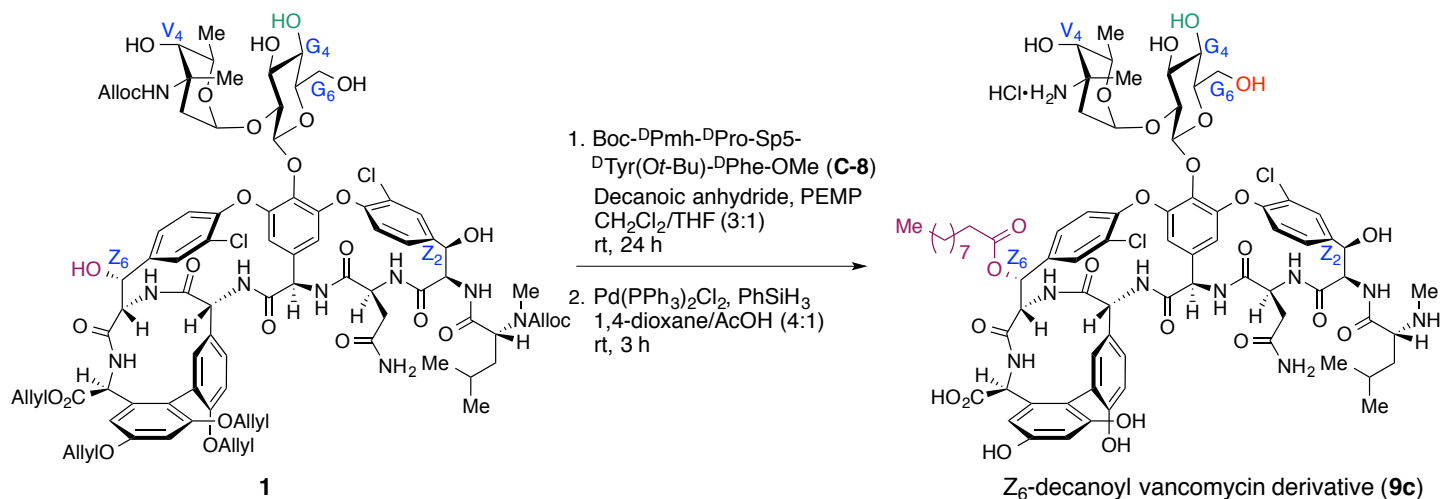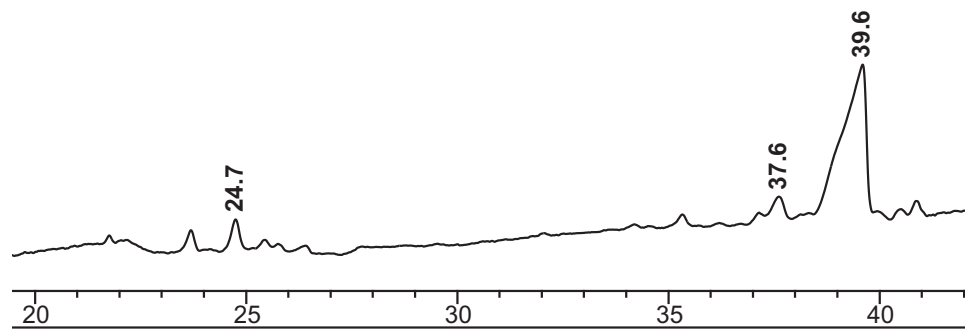

**HPLC Trace of Z<sub>6</sub>-selective decanoylation reaction:** RP-HPLC Method 3,  $\lambda = 220$  nm,  $t_R = 24.7$  min;  $t_R$  (protected Z<sub>6</sub>-decanoyl vancomycin) = 39.6 min.

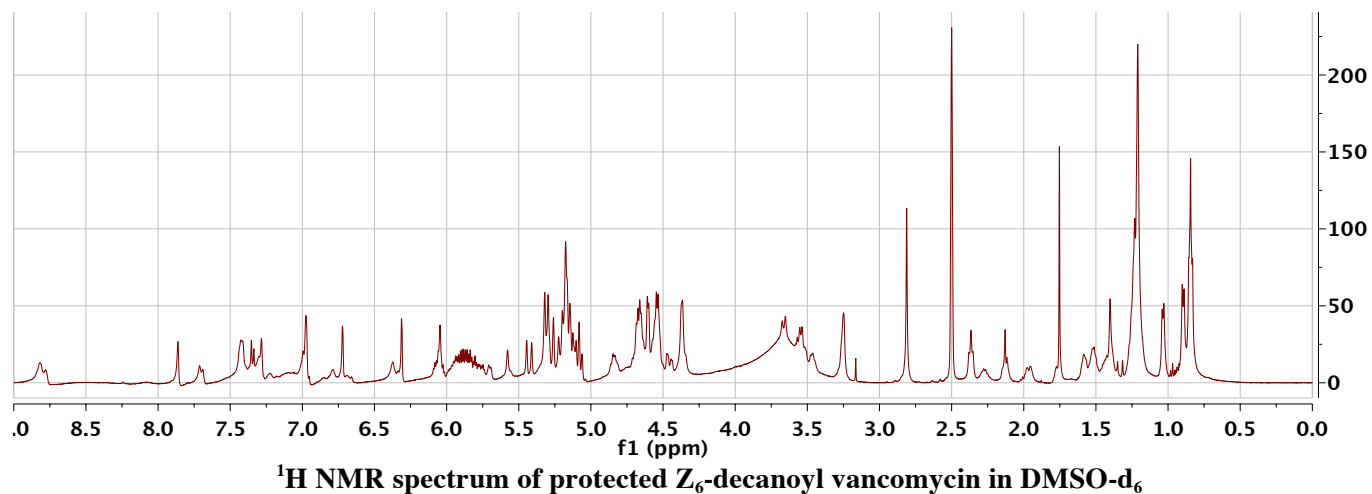

SY-III-121-Prot-Z6-decanoyl-vancomycin

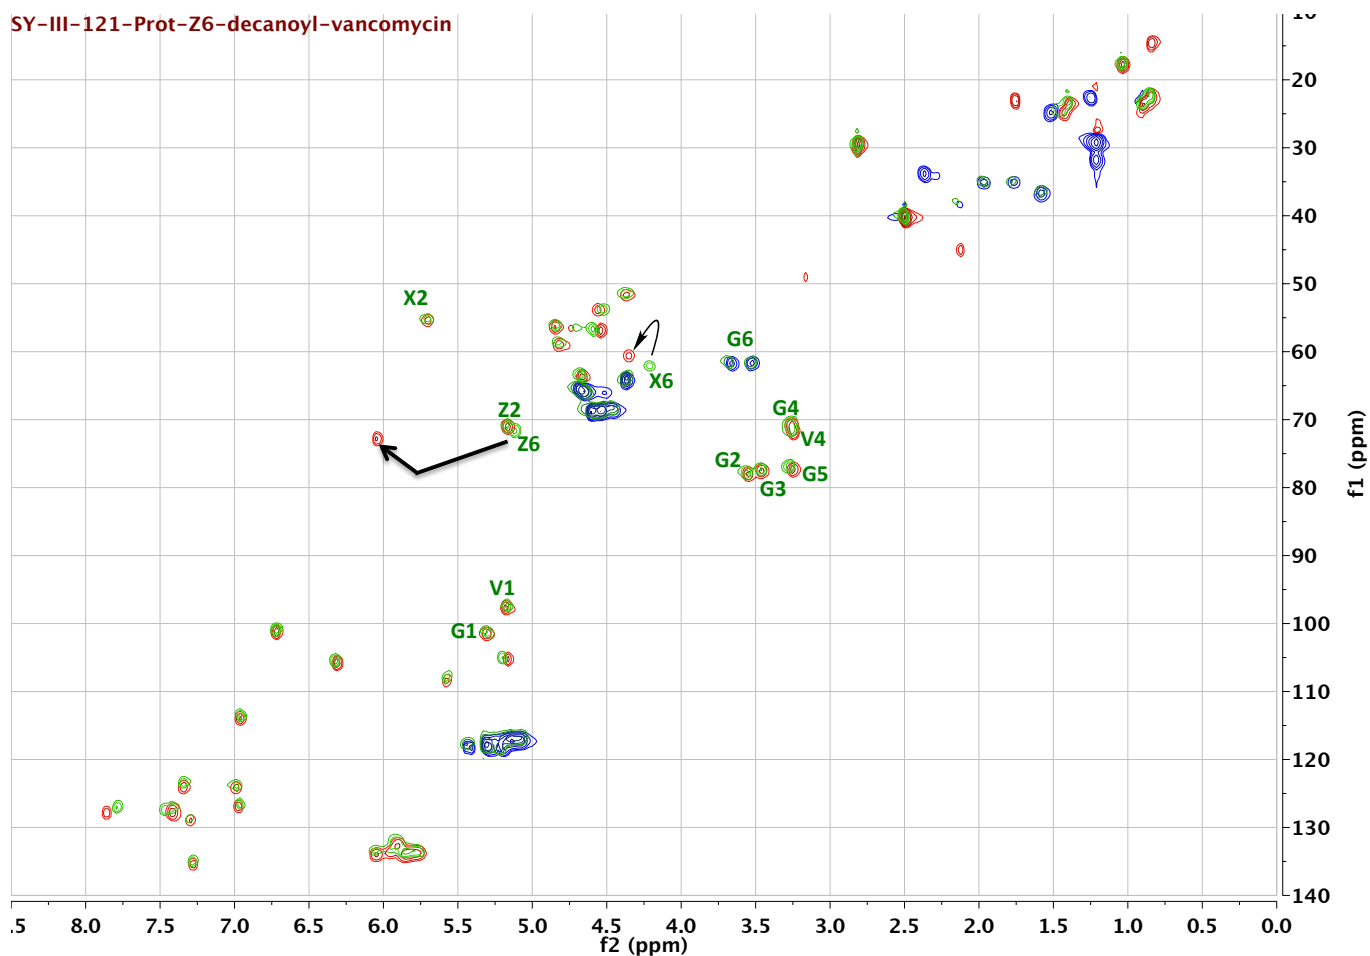

HSQC-NMR spectrum of protected Z<sub>6</sub>-decanoyl vancomycin in DMSO-d<sub>6</sub> [HSQC spectrum of native vancomycin is colored in green, and HSQC spectrum of decanoyl-vancomycin derivative is colored in red and blue]

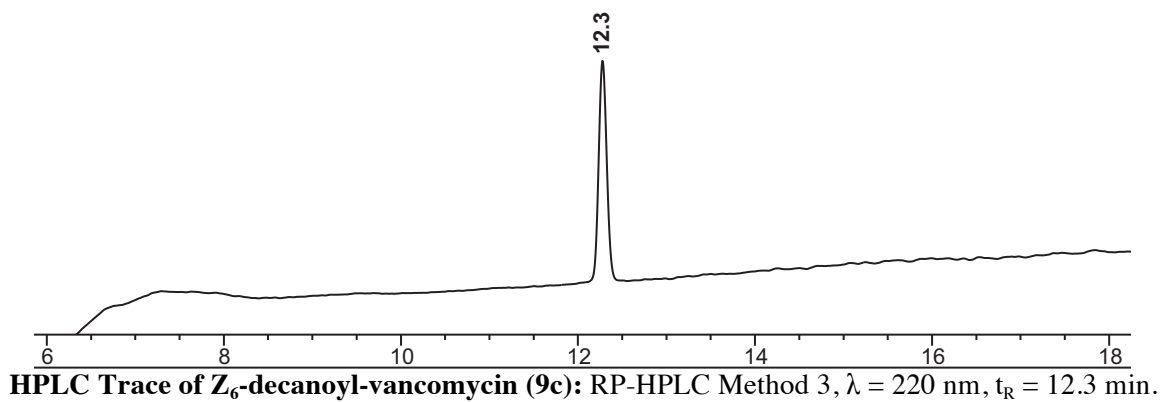

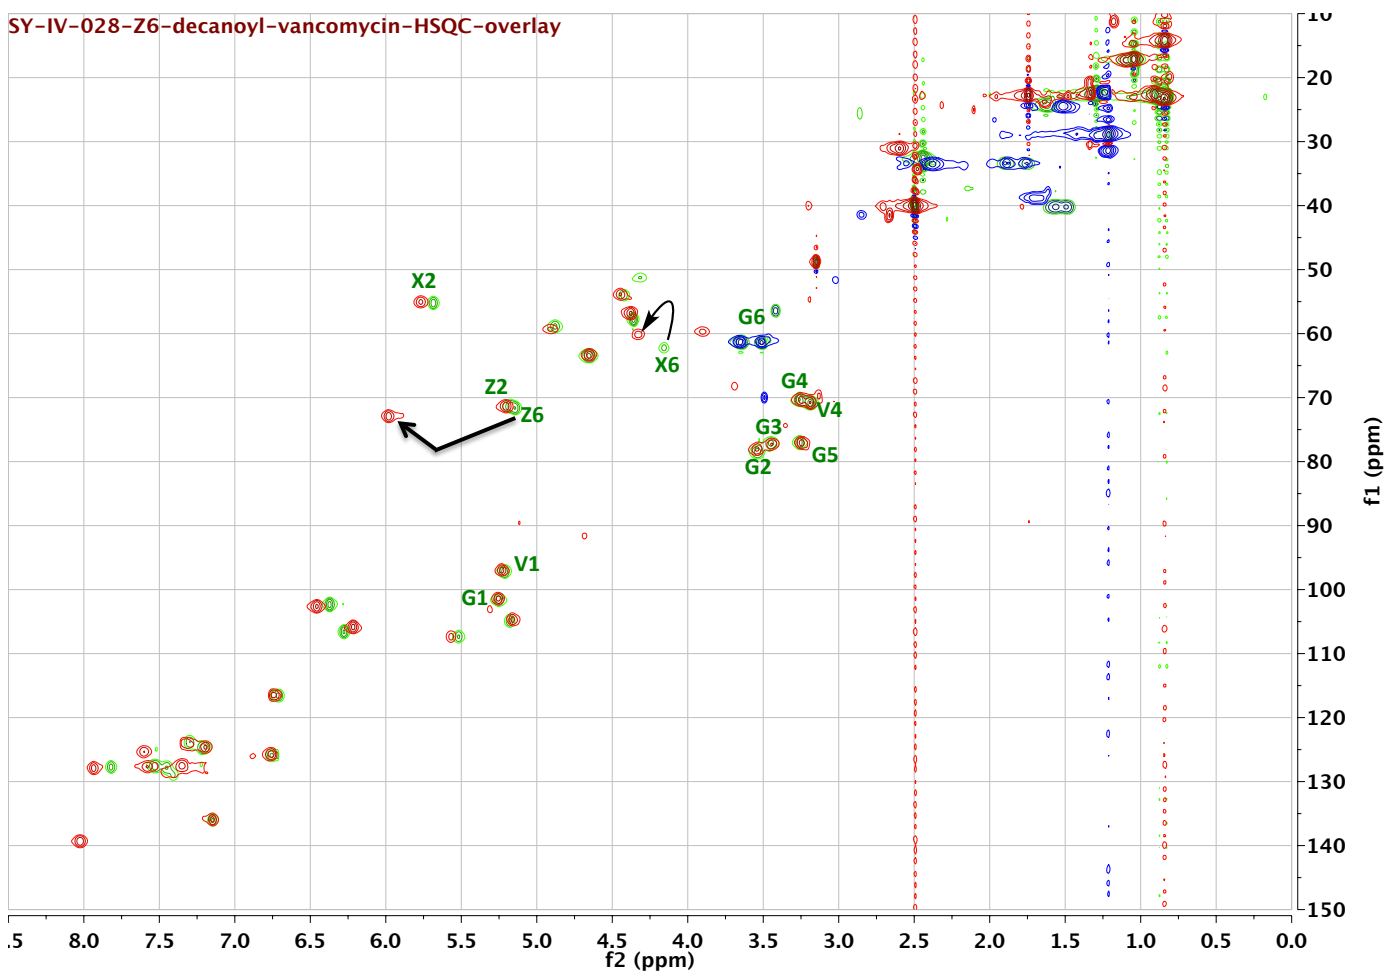

HSQC-NMR spectrum of Z<sub>6</sub>-decanoyl vancomycin in DMSO-d<sub>6</sub>. [HSQC spectrum of native vancomycin is colored in green, and HSQC spectrum of decanoyl-vancomycin derivative is colored in red and blue]

## VI. Synthesis of G<sub>4</sub>-acyl vancomycin derivatives 10-15

**Via. G<sub>4</sub>-butyryl-vancomycin derivative (10):** Analog **10** was synthesized using the general procedure 2 and isolated as a white solid (14.5 mg, 17% over two steps). RP-HPLC retention time (Method 3): 9.7 min; LC-MS (ESI<sup>+</sup>) for C<sub>71</sub>H<sub>84</sub>Cl<sub>2</sub>N<sub>9</sub>O<sub>25</sub> [M+H]<sup>+</sup>: Calc'd = 1518.479; found = 1518.469.

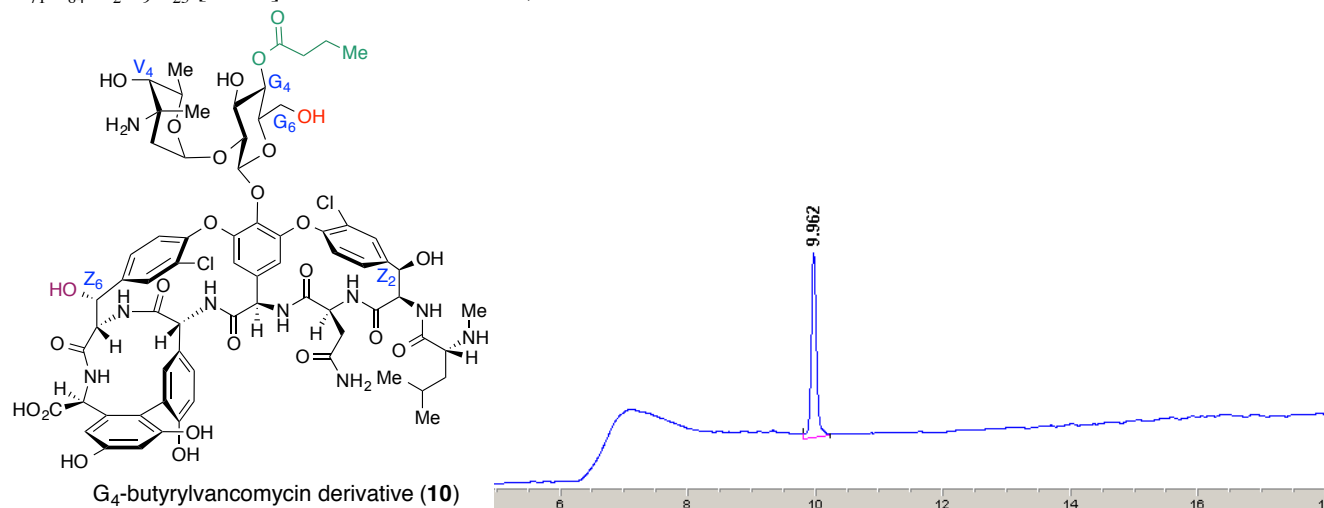

**Vib. G<sub>4</sub>-pentanoyl vancomycin derivative (11):** Analog **11** was synthesized using the general procedure 2 and isolated as a white solid (10 mg, 23% over two steps). RP-HPLC retention time (Method 3): 9.8 min; LC-MS (ESI<sup>+</sup>) for C<sub>71</sub>H<sub>84</sub>Cl<sub>2</sub>N<sub>9</sub>O<sub>25</sub> [M+H]<sup>+</sup>: Calc'd = 1532.495; found = 1532.526.

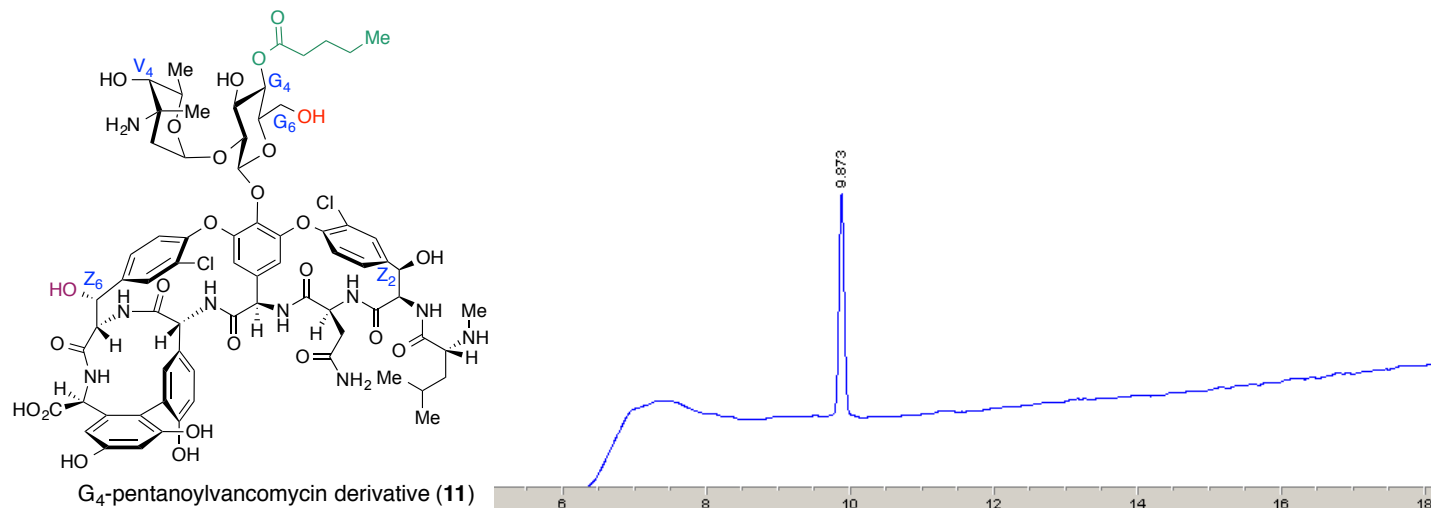

**Vic. G<sub>4</sub>-hexanoyl vancomycin derivative (12):** Analog **12** was synthesized using the general procedure 2 and isolated as a white solid (11 mg, 25% over two steps). RP-HPLC retention time (Method 3): 11.2 min; LC-MS (ESI<sup>+</sup>) for C<sub>72</sub>H<sub>86</sub>Cl<sub>2</sub>N<sub>9</sub>O<sub>25</sub> [M+H]<sup>+</sup>: Calc'd = 1546.511; found = 1546.510.



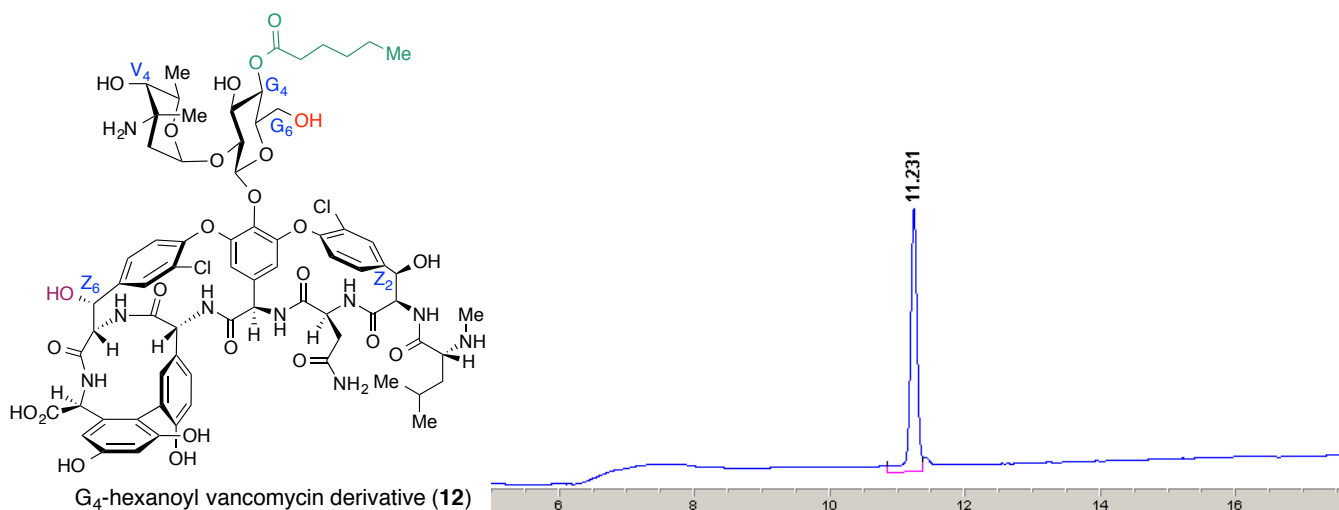

**VId. G<sub>4</sub>-octanoyl vancomycin derivative (13):** Analog **13** was synthesized using the general procedure 2 and isolated as a white solid (14 mg, 32% over two steps). RP-HPLC retention time (Method 3): 13.2 min; LC-MS (ESI<sup>+</sup>) for C<sub>74</sub>H<sub>90</sub>Cl<sub>2</sub>N<sub>9</sub>O<sub>25</sub> [M+H]<sup>+</sup>: Calc'd = 1574.542; found = 1574.540.

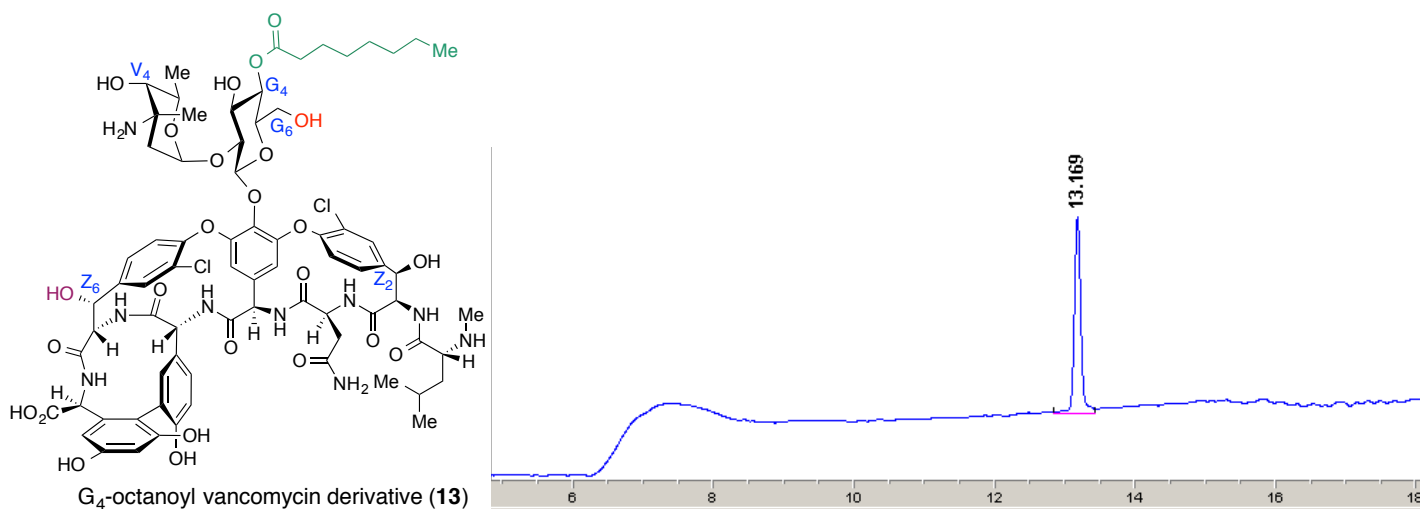

**VIe. G<sub>4</sub>-pentenoyl-vancomycin derivative (14):** Analog **14** was synthesized using the general procedure 2 and isolated as a white solid (18 mg, 21% over two steps). RP-HPLC retention time (Method 3): 10.2 min; LC-MS (ESI<sup>+</sup>) for C<sub>71</sub>H<sub>82</sub>Cl<sub>2</sub>N<sub>9</sub>O<sub>25</sub> [M+H]<sup>+</sup>: Calc'd = 1530.479; found = 1530.476.

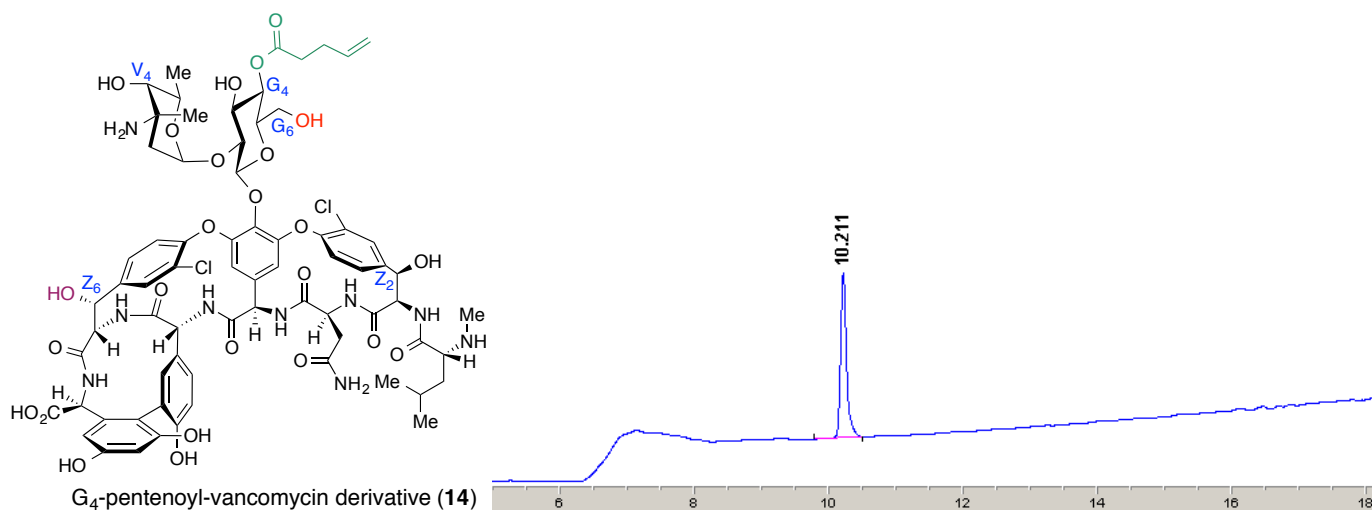

**Vif. G<sub>4</sub>-methyladipoyl-vancomycin derivative (15):** Analog **15** was synthesized using the general procedure 2 and isolated as a white solid. RP-HPLC retention time (Method 3): 10.1 min; LC-MS (ESI<sup>+</sup>) for C<sub>73</sub>H<sub>86</sub>Cl<sub>2</sub>N<sub>9</sub>O<sub>27</sub> [M+H]<sup>+</sup>: Calc'd = 1590.500; found = 1590.529.

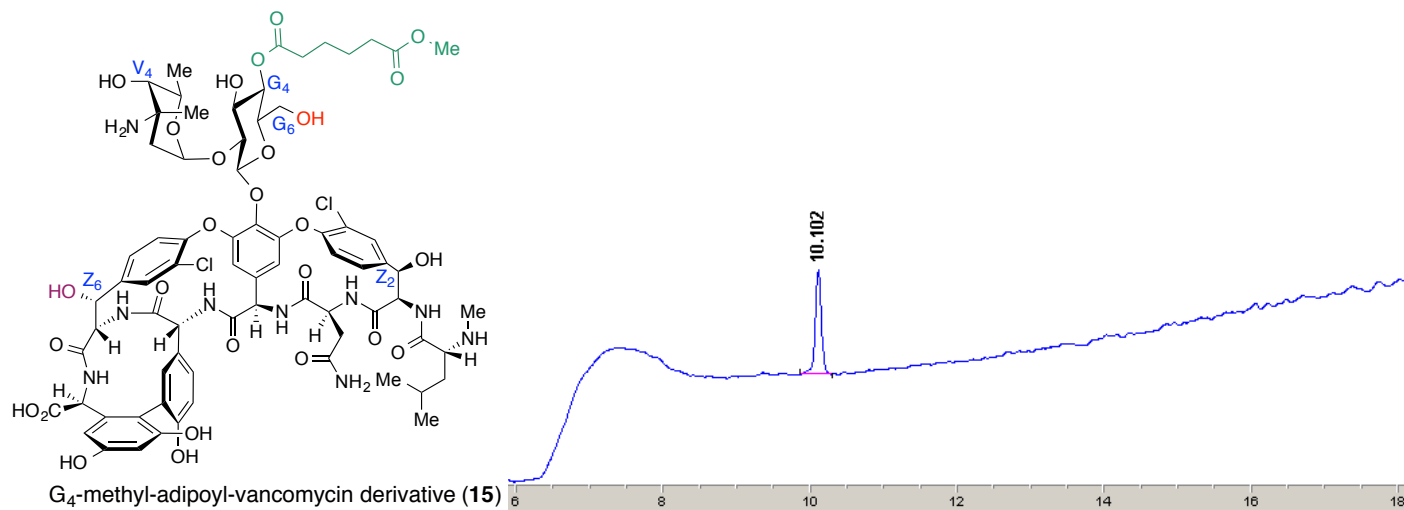

**VII. Synthesis of peptide catalysts:** Previously reported peptide catalysts were synthesized using either an Fmoc-based solid phase peptide synthetic strategy using commercially available Wang resin or 2-chlorotrityl resins, or a Boc-based solution phase peptide synthetic strategy. Please see original reports for details.<sup>2</sup>

Synthesis of catalyst **C-1** using solution phase peptide synthesis:

**Boc-Pmh-Asn(Trt)-His(Bn)-<sup>D</sup>Ala-<sup>D</sup>Ala-OMe (C-1):** white solid, 400 mg, 76%. <sup>1</sup>H NMR: (500 MHz, Chloroform-*d*) δ 8.10 (d, *J* = 6.7 Hz, 1H), 7.74 (d, *J* = 6.5 Hz, 1H), 7.39 – 7.07 (m, 22 H), 6.76 (s, 1H), 6.62 (d, *J* = 1.3 Hz, 1H), 5.26 (d, *J* = 8.1 Hz, 1H), 4.93 (s, 2H), 4.59 (m, 1H), 4.53 – 4.44 (m, 2H), 4.35 (m, 1H), 3.67 (s, 3H), 3.66 (m, 1H), 3.51 (s, 3H), 3.09 (dd, *J* = 15.4, 5.6 Hz, 1H), 3.04 – 2.90 (m, 2H), 2.93 – 2.82 (m, 4H), 1.46 – 1.30 (m, 2H), 1.34 (s, 9H), 1.29 (d, *J* = 7.3 Hz, 3H), 1.15 (d, *J* = 7.2 Hz, 3H). <sup>13</sup>C NMR: (126 MHz, Chloroform-*d*) δ 171.87, 170.99, 170.41, 169.70, 155.40, 144.26, 138.45, 137.87, 136.97, 129.03, 128.72, 128.36, 128.28, 128.00, 127.96, 127.49, 127.18, 117.60, 80.48, 70.93, 54.42, 53.82, 52.30, 50.88, 50.81, 49.42, 47.81, 38.05, 31.43, 28.97, 28.26, 26.91, 17.95, 16.78. **LC-MS:** (ESI) calculated for C<sub>55</sub>H<sub>65</sub>N<sub>10</sub>O<sub>9</sub> [M+H]<sup>+</sup> 1009.40, observed 1009.46.

Synthesis of catalyst **C-9** using solution phase peptide synthesis:<sup>2c</sup>

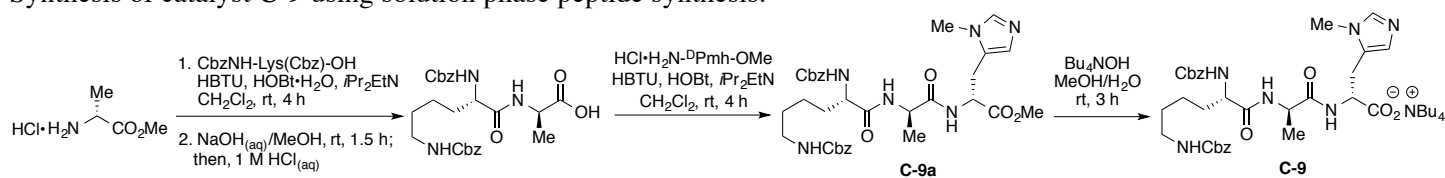

Catalyst **C-9** was synthesized using reported literature procedure.<sup>2c</sup> **Cbz-Lys(Cbz)-DAla-DPmh-OMe (C-9a):** white solid, 139 mg, 87%. <sup>1</sup>H NMR: (500 MHz, Chloroform-*d*) δ 7.32 – 7.28 (m, 10H), 6.95 (d, *J* = 7.9 Hz, 1H), 6.68 (s, 1H), 6.28 (d, *J* = 8.0 Hz, 1H), 5.15 (s, 1H), 5.09 (s, 2H), 5.06 (s, 2H), 4.76 (m, 1H), 4.47 (m, 1H), 4.15 (dd, *J* = 7.0, 7.0 Hz, 1H), 3.74 (s, 3H), 3.49 (s, 3H), 3.17 – 3.06 (m, 3H), 2.93 (dd, *J* = 15.6, 8.9 Hz, 1H), 1.97 – 1.86 (m, 4H), 1.51 (m, 2H), 1.38 (m, 2H), 1.25 (d, *J* = 6.8 Hz, 3H). <sup>13</sup>C NMR: (126 MHz, Chloroform-*d*) δ 172.01, 171.94, 171.29, 156.85, 156.67, 138.46, 136.68, 136.32, 128.58, 128.52, 128.42, 128.23, 128.11, 128.07, 126.53, 67.10, 66.63, 54.81, 52.73, 50.92, 48.70, 40.45, 31.35, 29.36, 26.68, 22.59, 17.30. **LC-MS:** (ESI) calculated for C<sub>33</sub>H<sub>43</sub>N<sub>6</sub>O<sub>8</sub> [M+H]<sup>+</sup> 651.31, observed 651.34.

### VIII. Evaluation of acyl-migration

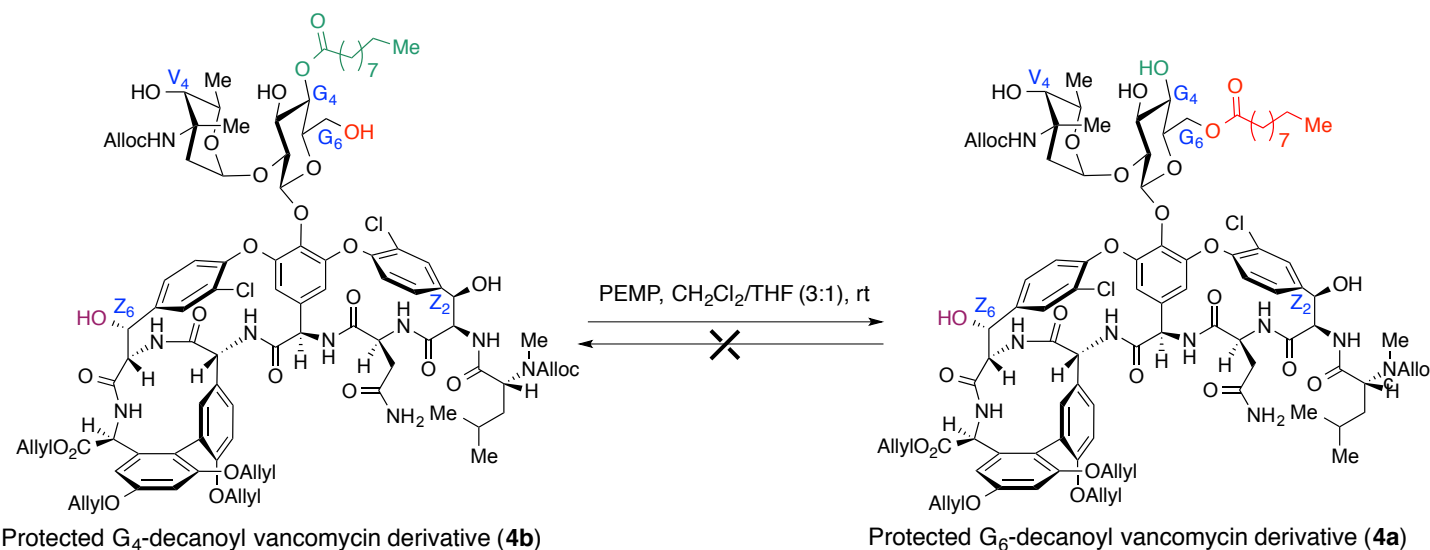

#### VIIIa: Treatment of **4b** under reaction condition:

In a flame-dried vial containing a stir bar, compound **4b** (5.4 mg, 2.79  $\mu\text{mol}$ , 1 equiv) was dissolved in THF (100  $\mu\text{L}$ ), and then  $\text{CH}_2\text{Cl}_2$  (300  $\mu\text{L}$ ) was added to the vial. To the solution, PEMP (1.0  $\mu\text{L}$ , 5.58  $\mu\text{mol}$ , 2 equiv) was added and reaction was monitored using RP-HPLC (Method 3). Compound **4b** was stable at  $t = 5$  h; however after 20 h, **4b** is converted to **4a** (1:1 mixture, see HPLC traces below). The results indicate that acyl migration occurs from G<sub>4</sub>-position to G<sub>6</sub>-position only under strong basic conditions with prolonged reaction time.

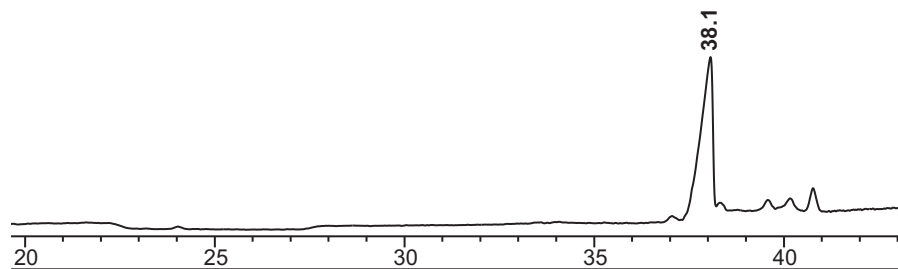

HPLC Trace of a standard sample of **4b**: RP-HPLC Method 3,  $\lambda = 220$  nm,  $t_R$  (**4b**) = 38.1 min.

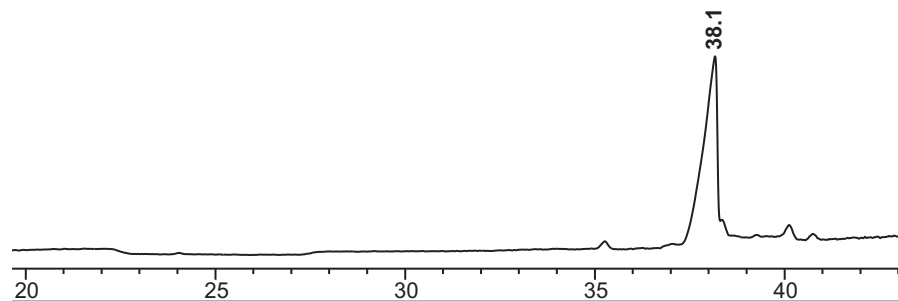

HPLC Trace of **4b** in the presence of PEMP (2 equiv) after 5 h: RP-HPLC Method 3,  $\lambda = 220$  nm,  $t_R$  (**4b**) = 38.1 min.

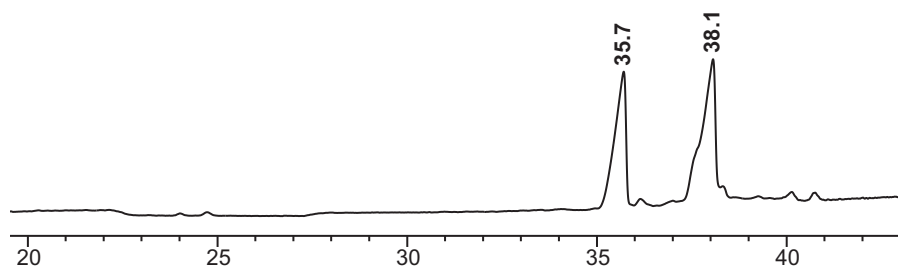

**HPLC Trace of 4b in the presence of PEMP (2 equiv) after 20 h:** RP-HPLC Method 3,  $\lambda = 220$  nm,  $t_R$  (**4b**) = 38.1 min  $t_R$  (**4a**) = 35.7 min.

In a flame-dried glass vial containing a stir bar, compound **4b** (4.5 mg, 2.33  $\mu$ mol, 1 equiv) was dissolved in THF (100  $\mu$ L), and then  $\text{CH}_2\text{Cl}_2$  (300  $\mu$ L) was added to the vial. To the solution, PEMP (0.2  $\mu$ L, 1.16  $\mu$ mol, 0.5 equiv) was added and reaction was monitored using RP-HPLC (Method 3). Compound **4b** was stable up to 23 h (see HPLC traces below). The observations suggest that under mild basic conditions protected  $G_4$ -decanoyl-vancomycin derivative does not undergo acyl migration.

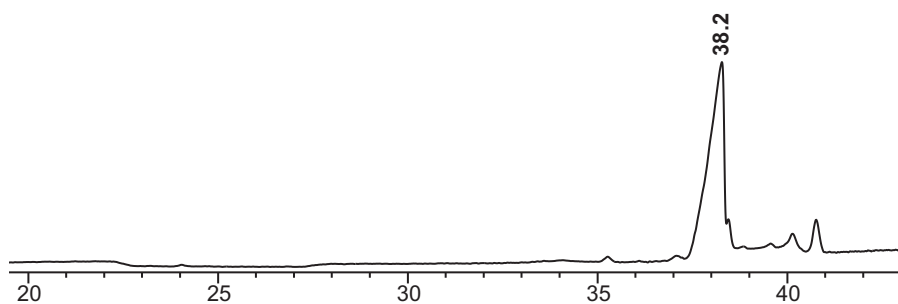

**HPLC Trace of 4b in the presence of PEMP (0.5 equiv) after 5 h:** RP-HPLC Method 3,  $\lambda = 220$  nm,  $t_R$  (**4b**) = 38.2 min.

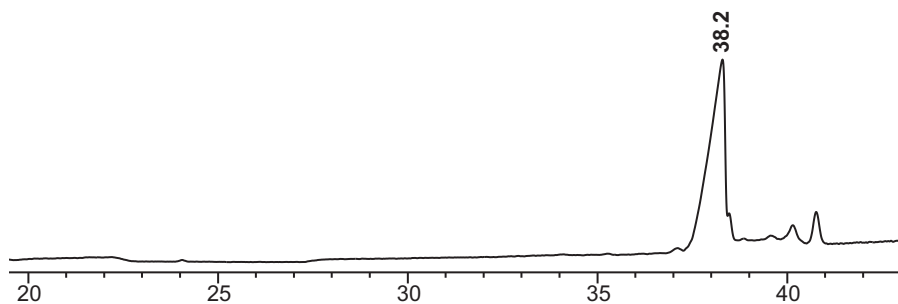

**HPLC Trace of 4b in the presence of PEMP (0.5 equiv) after 23 h:** RP-HPLC Method 3,  $\lambda = 220$  nm,  $t_R$  (**4b**) = 38.2 min.

#### VIIIb: Treatment of 4a under reaction condition:

In a flame-dried glass vial containing a stir bar, compound **4a** (4.5 mg, 2.33  $\mu$ mol, 1 equiv) was dissolved in THF (100  $\mu$ L) and then  $\text{CH}_2\text{Cl}_2$  (300  $\mu$ L) was added to the vial. To the solution, PEMP (0.85  $\mu$ L, 4.66  $\mu$ mol, 2 equiv) was added and reaction was monitored using RP-HPLC (Method 3). Compound **4a** was stable up to 20 h (see RP-HPLC traces below). The results indicate that there is no acyl-migration from  $G_6$ -position to  $G_4$ -position occurring under basic conditions. This supports our hypothesis that the formation of  $G_4$ -acyl product is exclusively assisted by the catalyst, and not due to an internal acyl migration.

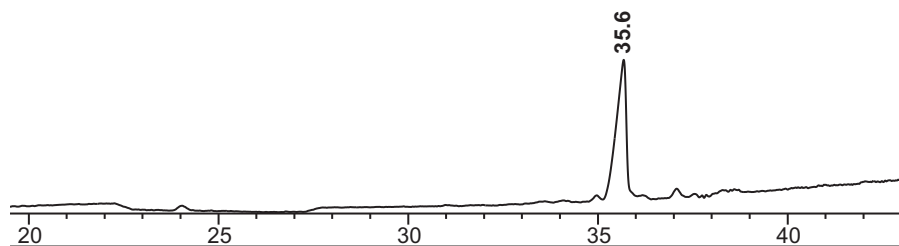

**HPLC Trace of a standard sample of 4a:** RP-HPLC Method 3,  $\lambda = 220$  nm,  $t_R$  (**4a**) = 35.6 min.

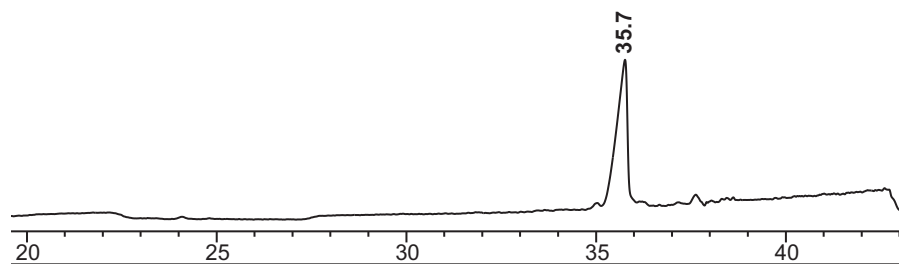

**HPLC Trace of 4a in the presence of PEMP (2 equiv) after 5 h:** RP-HPLC Method 3,  $\lambda = 220$  nm,  $t_R$  (**4a**) = 35.7 min.

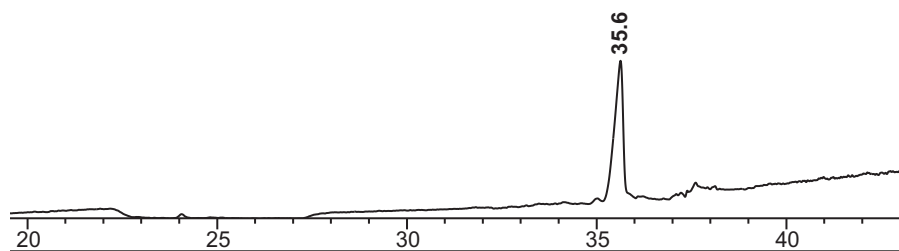

**HPLC Trace of 4a in the presence of PEMP (2 equiv) after 20 h:** RP-HPLC Method 3,  $\lambda = 220$  nm,  $t_R$  (**4a**) = 35.6 min.

### IX. Competition studies using Boc-Leu-<sup>D</sup>Ala-<sup>D</sup>Ala-OH, a tripeptide ligand for vancomycin

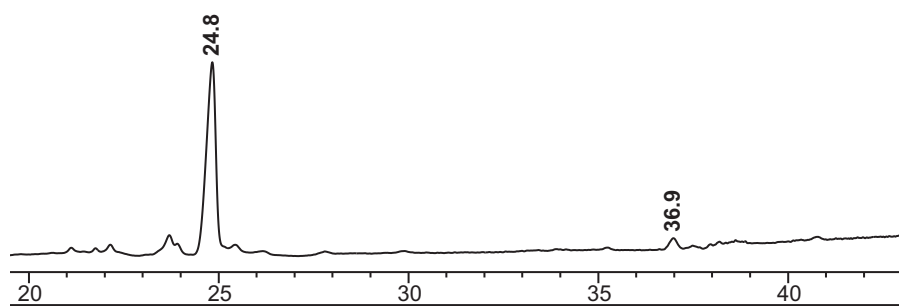

**HPLC Trace of reaction with the ligand:** RP-HPLC Method 3,  $\lambda = 220$  nm,  $t_R$  (**3**) = 24.8 min.

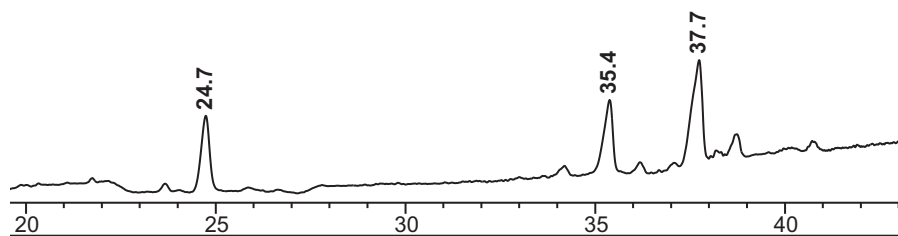

HPLC Trace of reaction with C-7 and ligand: RP-HPLC Method 3,  $\lambda = 220$  nm,  $t_R$  (4a) = 35.4 min,  $t_R$  (4b) = 37.7 min.

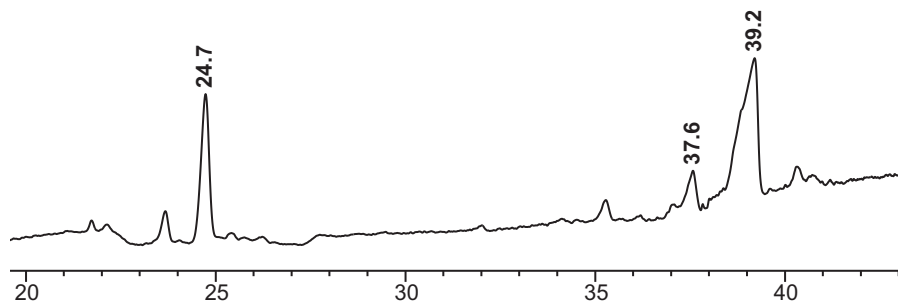

HPLC Trace of reaction with C-8 and ligand: RP-HPLC Method 3,  $\lambda = 220$  nm,  $t_R$  of protected Z<sub>6</sub>-decanoyl-vancomycin (4c) = 39.2 min.

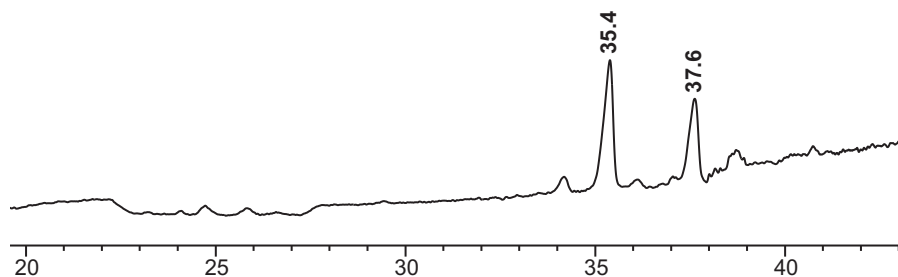

HPLC Trace of reaction with C-9 and ligand: RP-HPLC Method 3,  $\lambda = 220$  nm,  $t_R$  (4a) = 35.6 min,  $t_R$  (4b) = 37.6 min.

## X. Antimicrobial evaluation of acyl-vancomycin derivatives & Minimum inhibitory concentration (MIC) data:

**MSSA** = methicillin-susceptible *S. aureus*; **MRSA** = methicillin-resistant *S. aureus*; **VSE** = vancomycin- susceptible enterococci (*E. faecalis*); **VRE (VanB)** = vancomycin-resistant enterococci (*E. faecalis*, teicoplanin susceptible); **VRE (VanA)** = vancomycin-resistant enterococcus (*E. faecalis*, teicoplanin resistant). **ATCC #:** American Type Culture Collection isolate. **MMX #:** Micromyx, LLC isolate. Minimum inhibitory concentrations (MICs) were determined by Micromyx, LLC (Kalamazoo, MI) in accordance with CLSI guidelines.

| Compound    | <i>S. aureus</i><br>(MSSA)<br>ATCC<br>29213 | <i>S. aureus</i><br>(MRSA)<br>ATCC<br>43300 | <i>E. faecalis</i><br>(Van S)<br>ATCC<br>29212 | <i>E. faecalis</i><br>(Van B)<br>ATCC<br>51299 | <i>E. faecalis</i><br>(Van A)<br>MMX<br>486 <sup>a</sup> |
|-------------|---------------------------------------------|---------------------------------------------|------------------------------------------------|------------------------------------------------|----------------------------------------------------------|
| <b>9a</b>   | 0.25                                        | 0.25                                        | 0.5                                            | 1                                              | 16                                                       |
| <b>9b</b>   | 0.12                                        | 0.12                                        | 0.25                                           | 0.25                                           | 16                                                       |
| <b>9c</b>   | 0.25                                        | 0.5                                         | 0.25                                           | 0.5                                            | 16                                                       |
| <b>10</b>   | 4                                           | 4                                           | 8                                              | 32                                             | >64                                                      |
| <b>11</b>   | 2                                           | 4                                           | 4                                              | 32                                             | >32                                                      |
| <b>12</b>   | 2                                           | 2                                           | 4                                              | 16                                             | >64                                                      |
| <b>13</b>   | 0.5                                         | 0.5                                         | 1                                              | 8                                              | >64                                                      |
| <b>14</b>   | 4                                           | 4                                           | 8                                              | 32                                             | >32                                                      |
| <b>15</b>   | 4                                           | 4                                           | 8                                              | 64                                             | >64                                                      |
| Vancomycin  | 1                                           | 1                                           | 2                                              | 16                                             | >64 <sup>b</sup>                                         |
| Teicoplanin | 1                                           | 0.5                                         | 0.25                                           | 0.25                                           | >64 <sup>b</sup>                                         |
| Linezolid   | 4                                           | 4                                           | 2                                              | 2                                              | 2                                                        |

<sup>a</sup>MMX: Micromyx isolate number. <sup>b</sup>Vancomycin exhibits an MIC of 512 µg/mL and teicoplanin A<sub>2</sub>-2 exhibits an MIC of 128 µg/mL against Van A phenotype VRE strain, based on a literature report.<sup>3</sup>



## XI. NMR Spectra

NMR spectra of catalyst Cbz-Lys(Cbz)-<sup>D</sup>Ala-<sup>D</sup>Pmh-OMe:

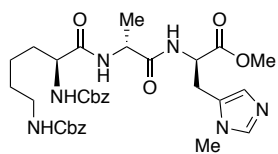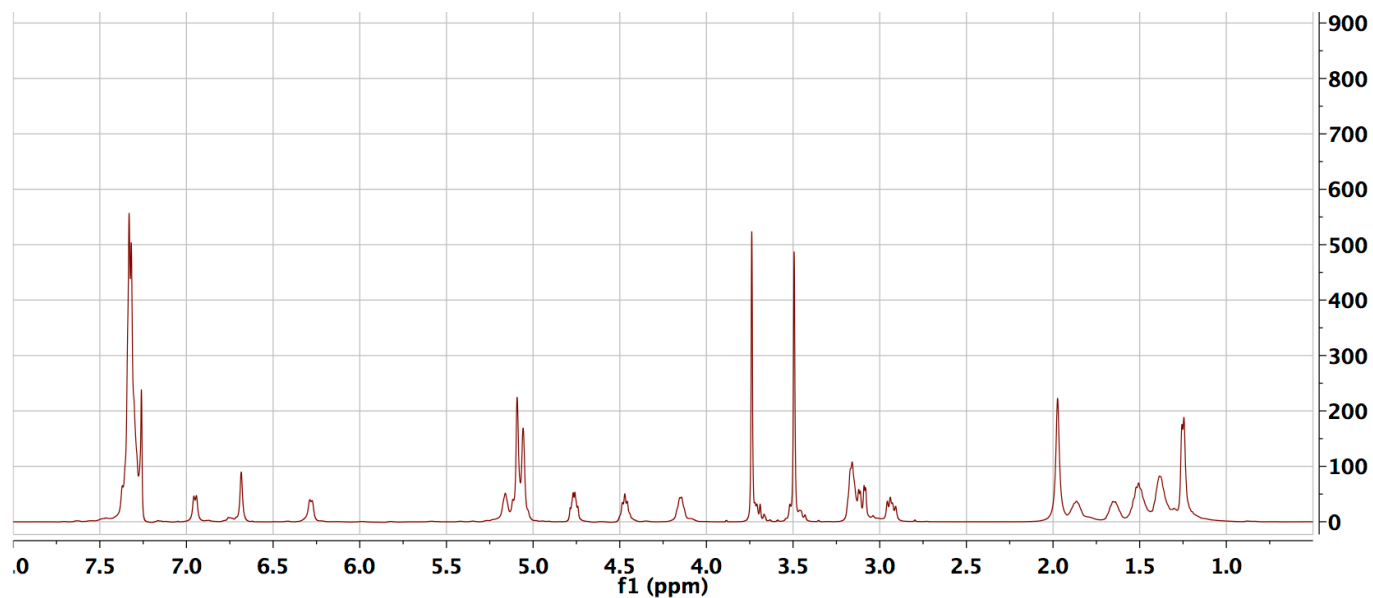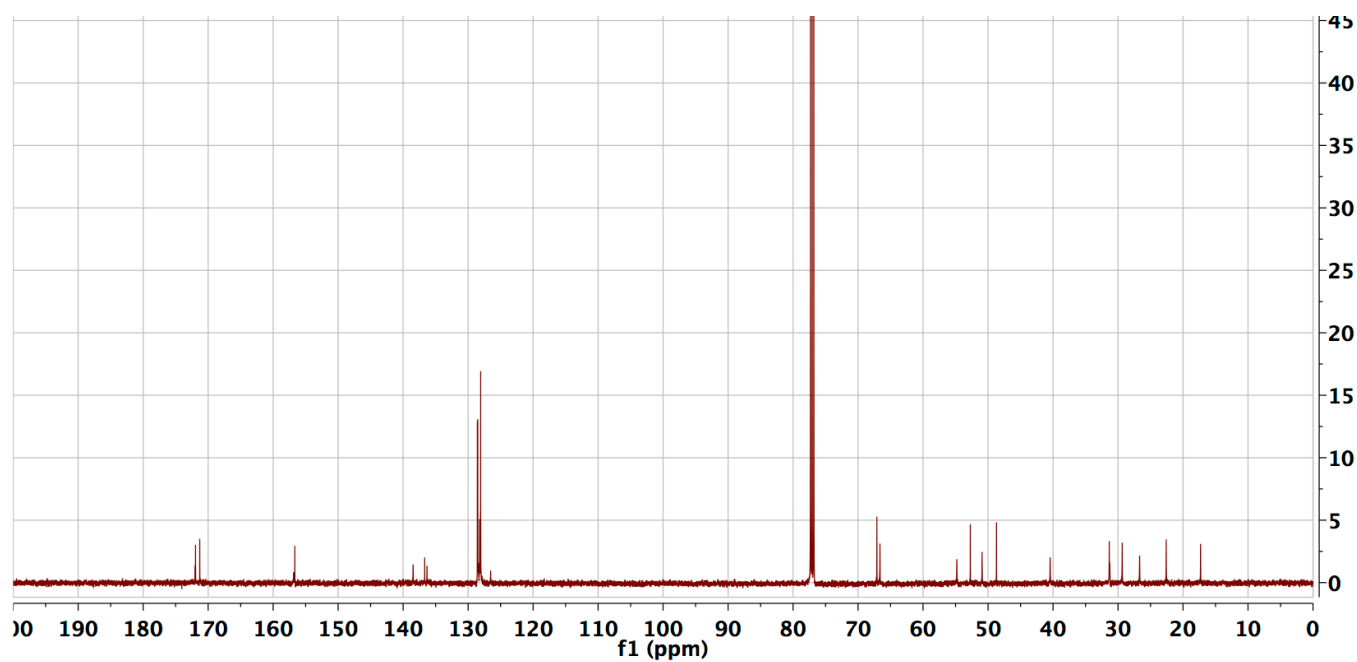

NMR spectra of catalyst Boc-Pmh-Asn(Trt)-His(Bn)-<sup>D</sup>Ala-<sup>D</sup>Ala-OMe:

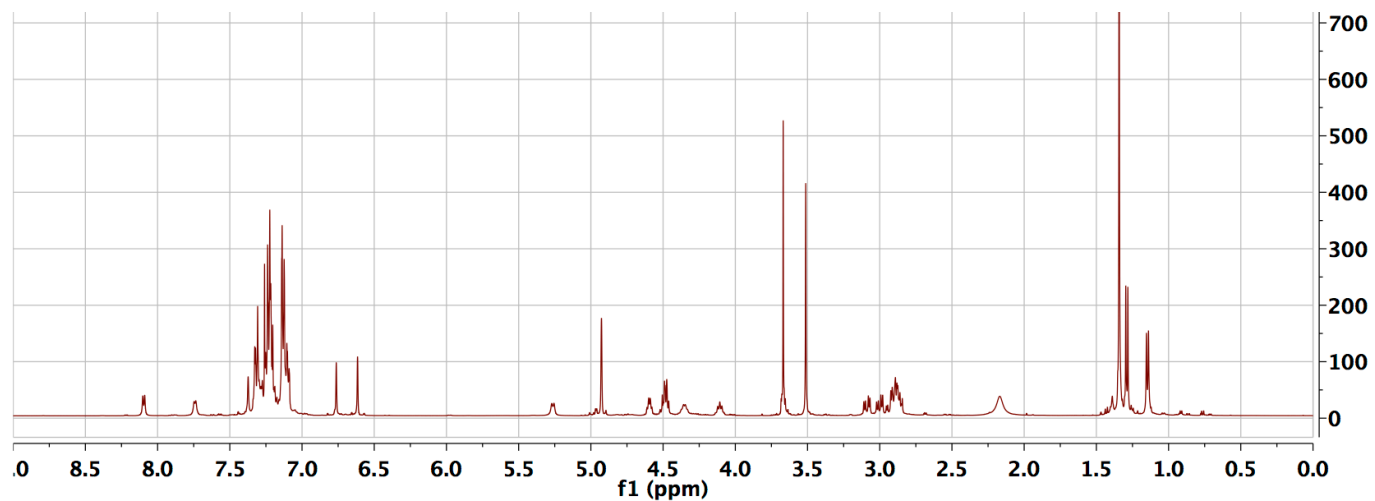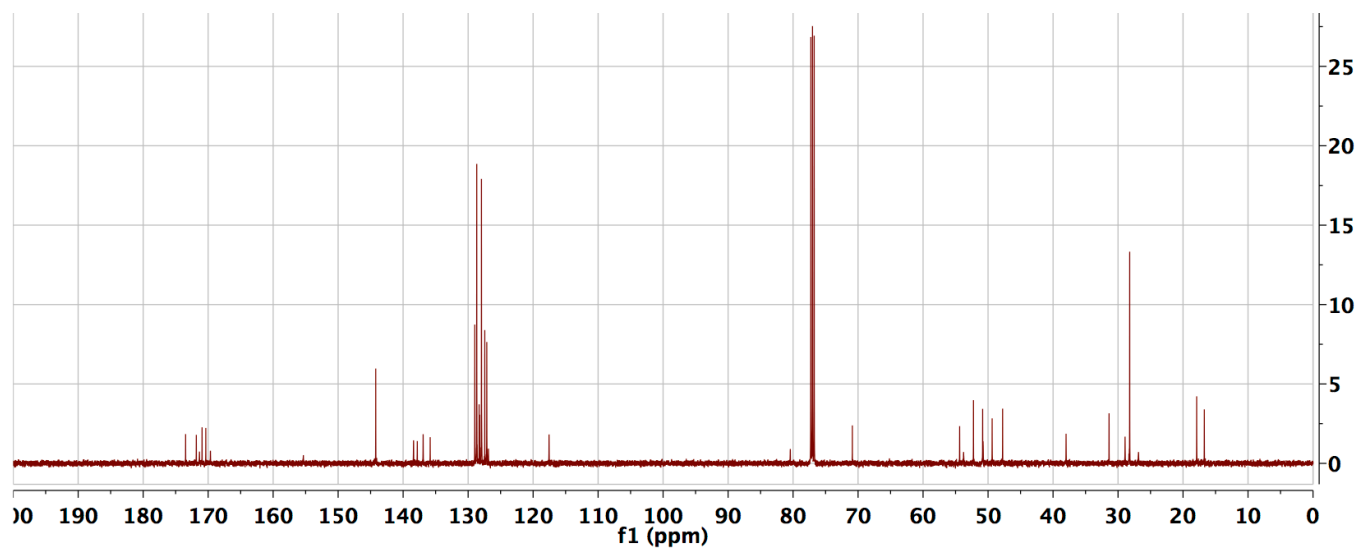

---

<sup>1</sup> (a) Thompson, C.; Ge, M.; Kahne, D. Synthesis of vancomycin from the aglycon. *J. Am. Chem. Soc.* **1999**, *121*, 1237.  
(b) Griffith, B. R.; Krepel, C.; Fu, X.; Blanchard, S.; Ahmed, A.; Edmiston, C. E.; Thorson, J. S. Model for antibiotic optimization via neoglycosylation: Synthesis of liponeoglycopeptides active against VRE. *J. Am. Chem. Soc.* **2007**, *129*, 8150.

<sup>2</sup> Fowler, B. S.; Laemmerhold, K. M.; Miller, S. J. Catalytic Site-Selective Thiocarbonylations and Deoxygenations of Vancomycin Reveal Hydroxyl-Dependent Conformational Effects. *J. Am. Chem. Soc.* **2012**, *134*, 9755.; Fowler, B. S.; Mikochik, P. J.; Miller, S. J. Peptide-Catalyzed Kinetic Resolution of Formamides and Thioformamides as an Entry to Nonracemic Amines. *J. Am. Chem. Soc.* **2010**, *132*, 2870.; Sculimbrene, B. R.; Morgan, A. J.; Miller, S. J. Enantiodivergence in small-molecule catalysis of asymmetric phosphorylation: Concise total syntheses of the enantiomeric D-myo-inositol-1-phosphate and D-myo-inositol-3-phosphate. *J. Am. Chem. Soc.* **2002**, *124*, 11653.; Fiori, K. W.; Puchlopek, A. L. A.; Miller, S. J. Enantioselective sulfonylation reactions mediated by a tetrapeptide catalyst. *Nat. Chem.* **2009**, *1*, 630.

<sup>3</sup> Kerns, R.; Dong, S. D.; Fukuzawa, S.; Carbeck, J.; Kohler, J.; Silver, L.; Kahne, D. The role of hydrophobic substituents in the biological activity of glycopeptide antibiotics. *J. Am. Chem. Soc.* **2000**, *122*, 12608.

SY-IV-053-G4-butyryl-vancomycin

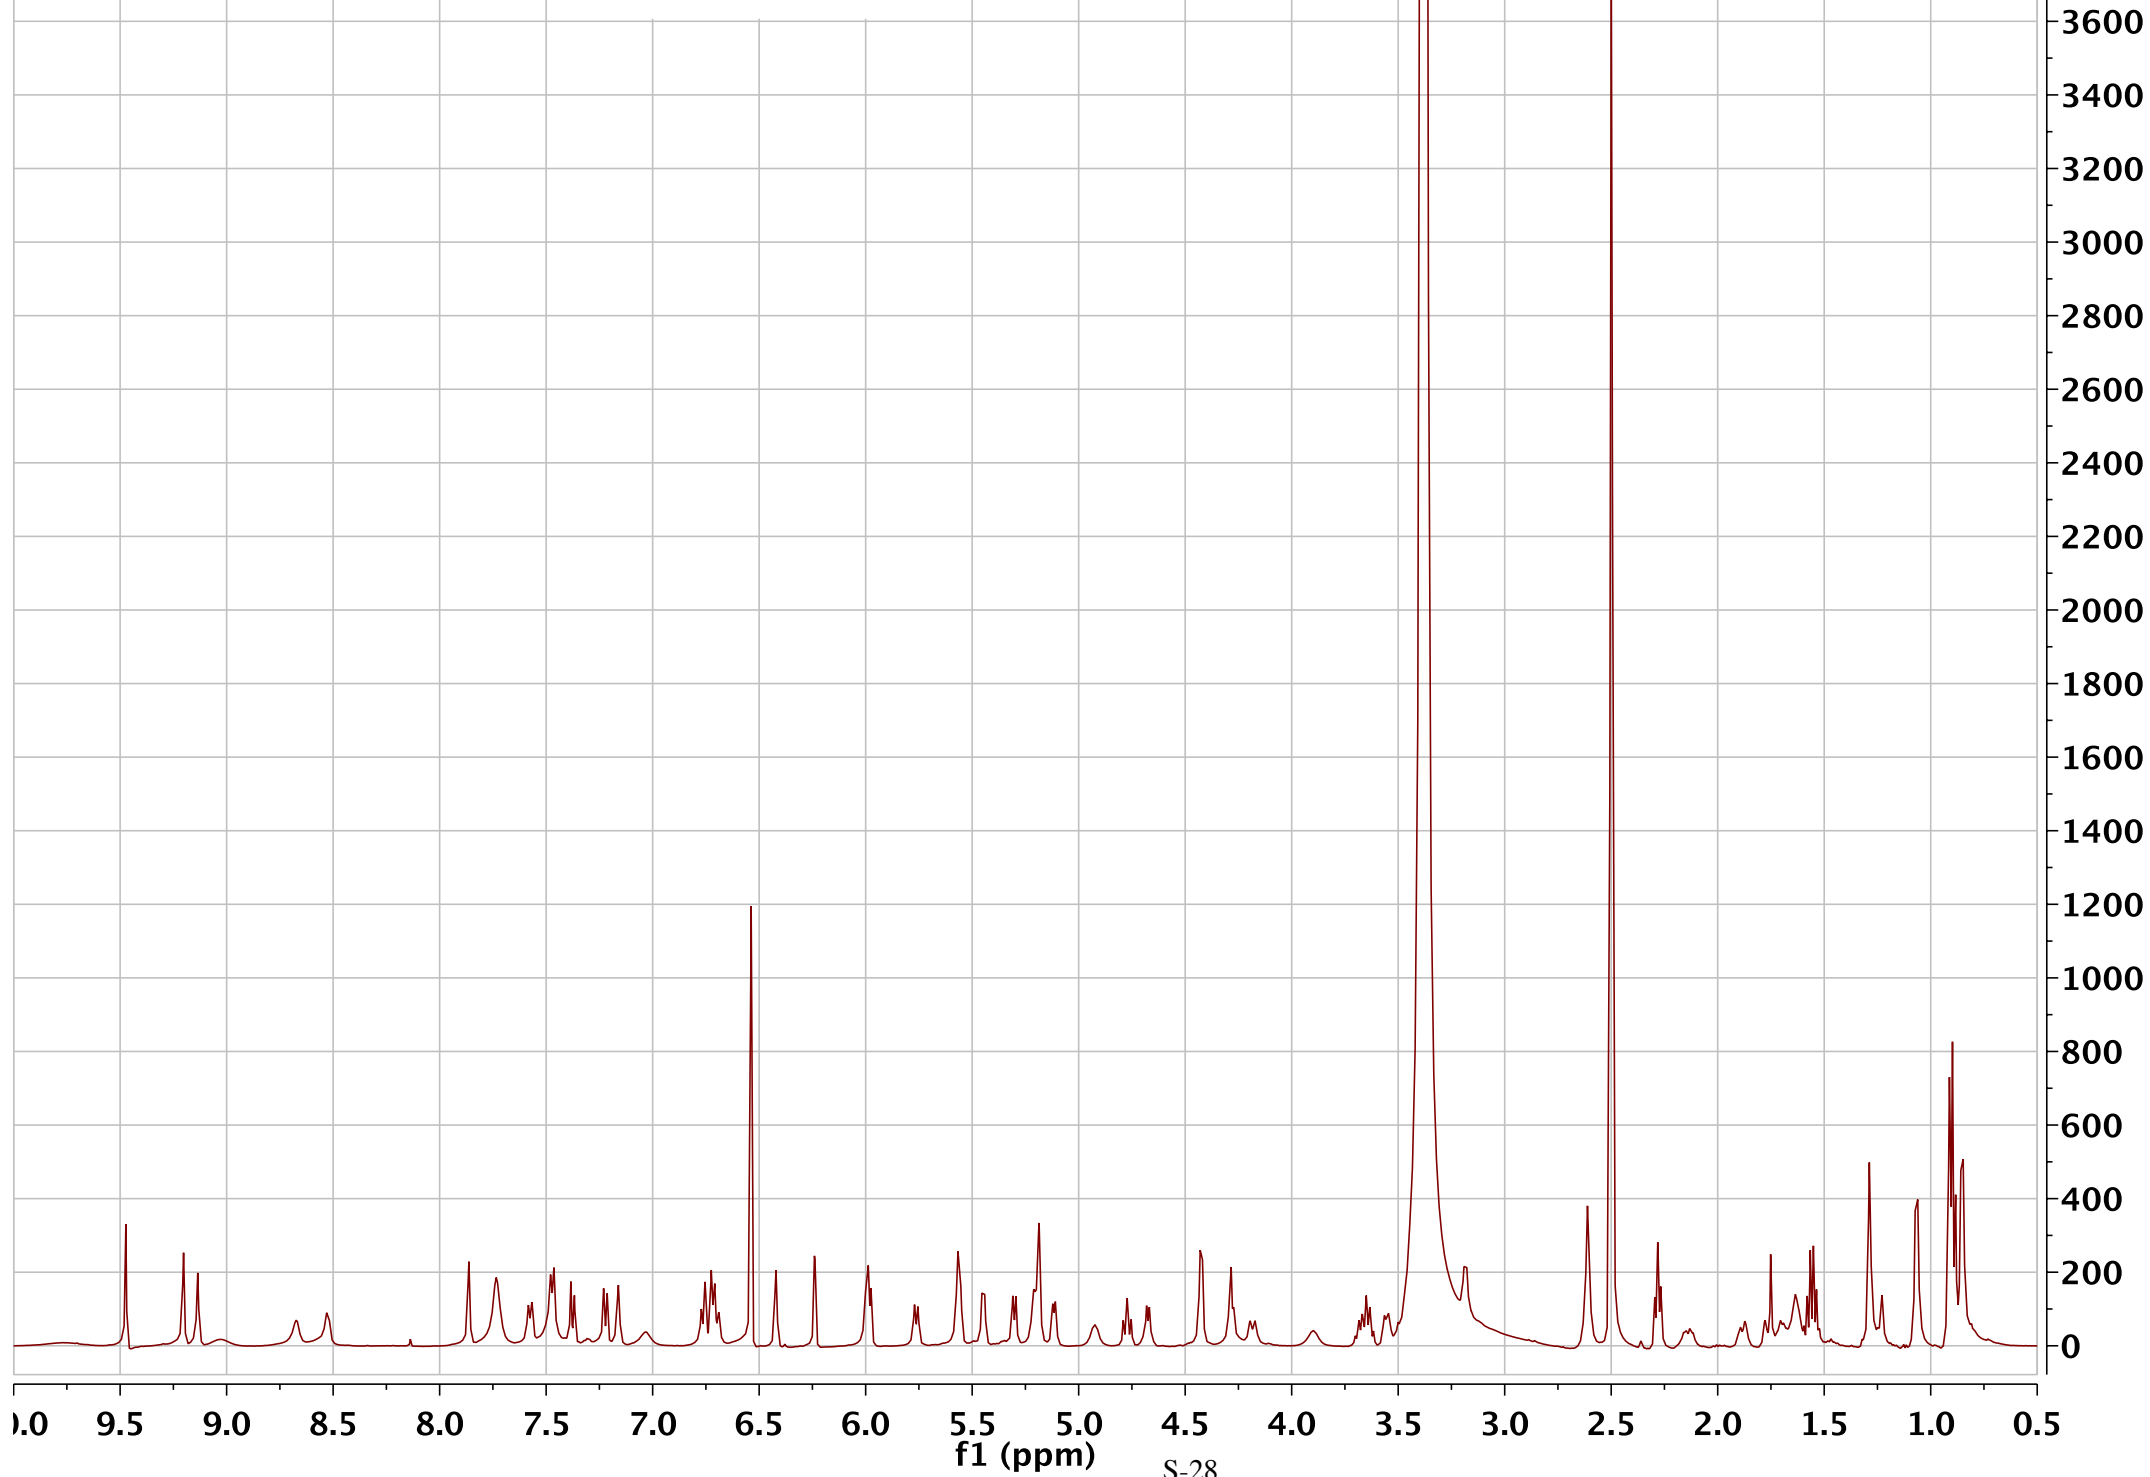

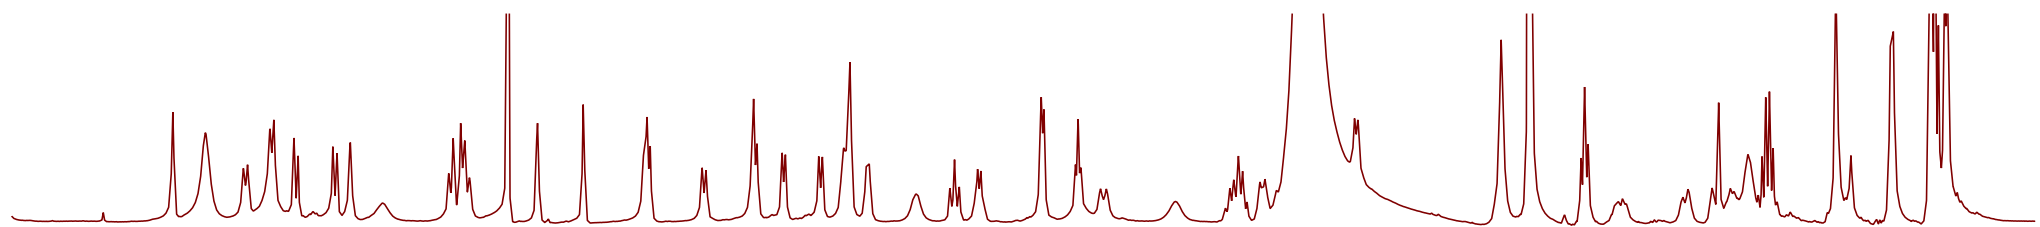

SY-IV-053-G4-butyryl-vancomycin-HSQC

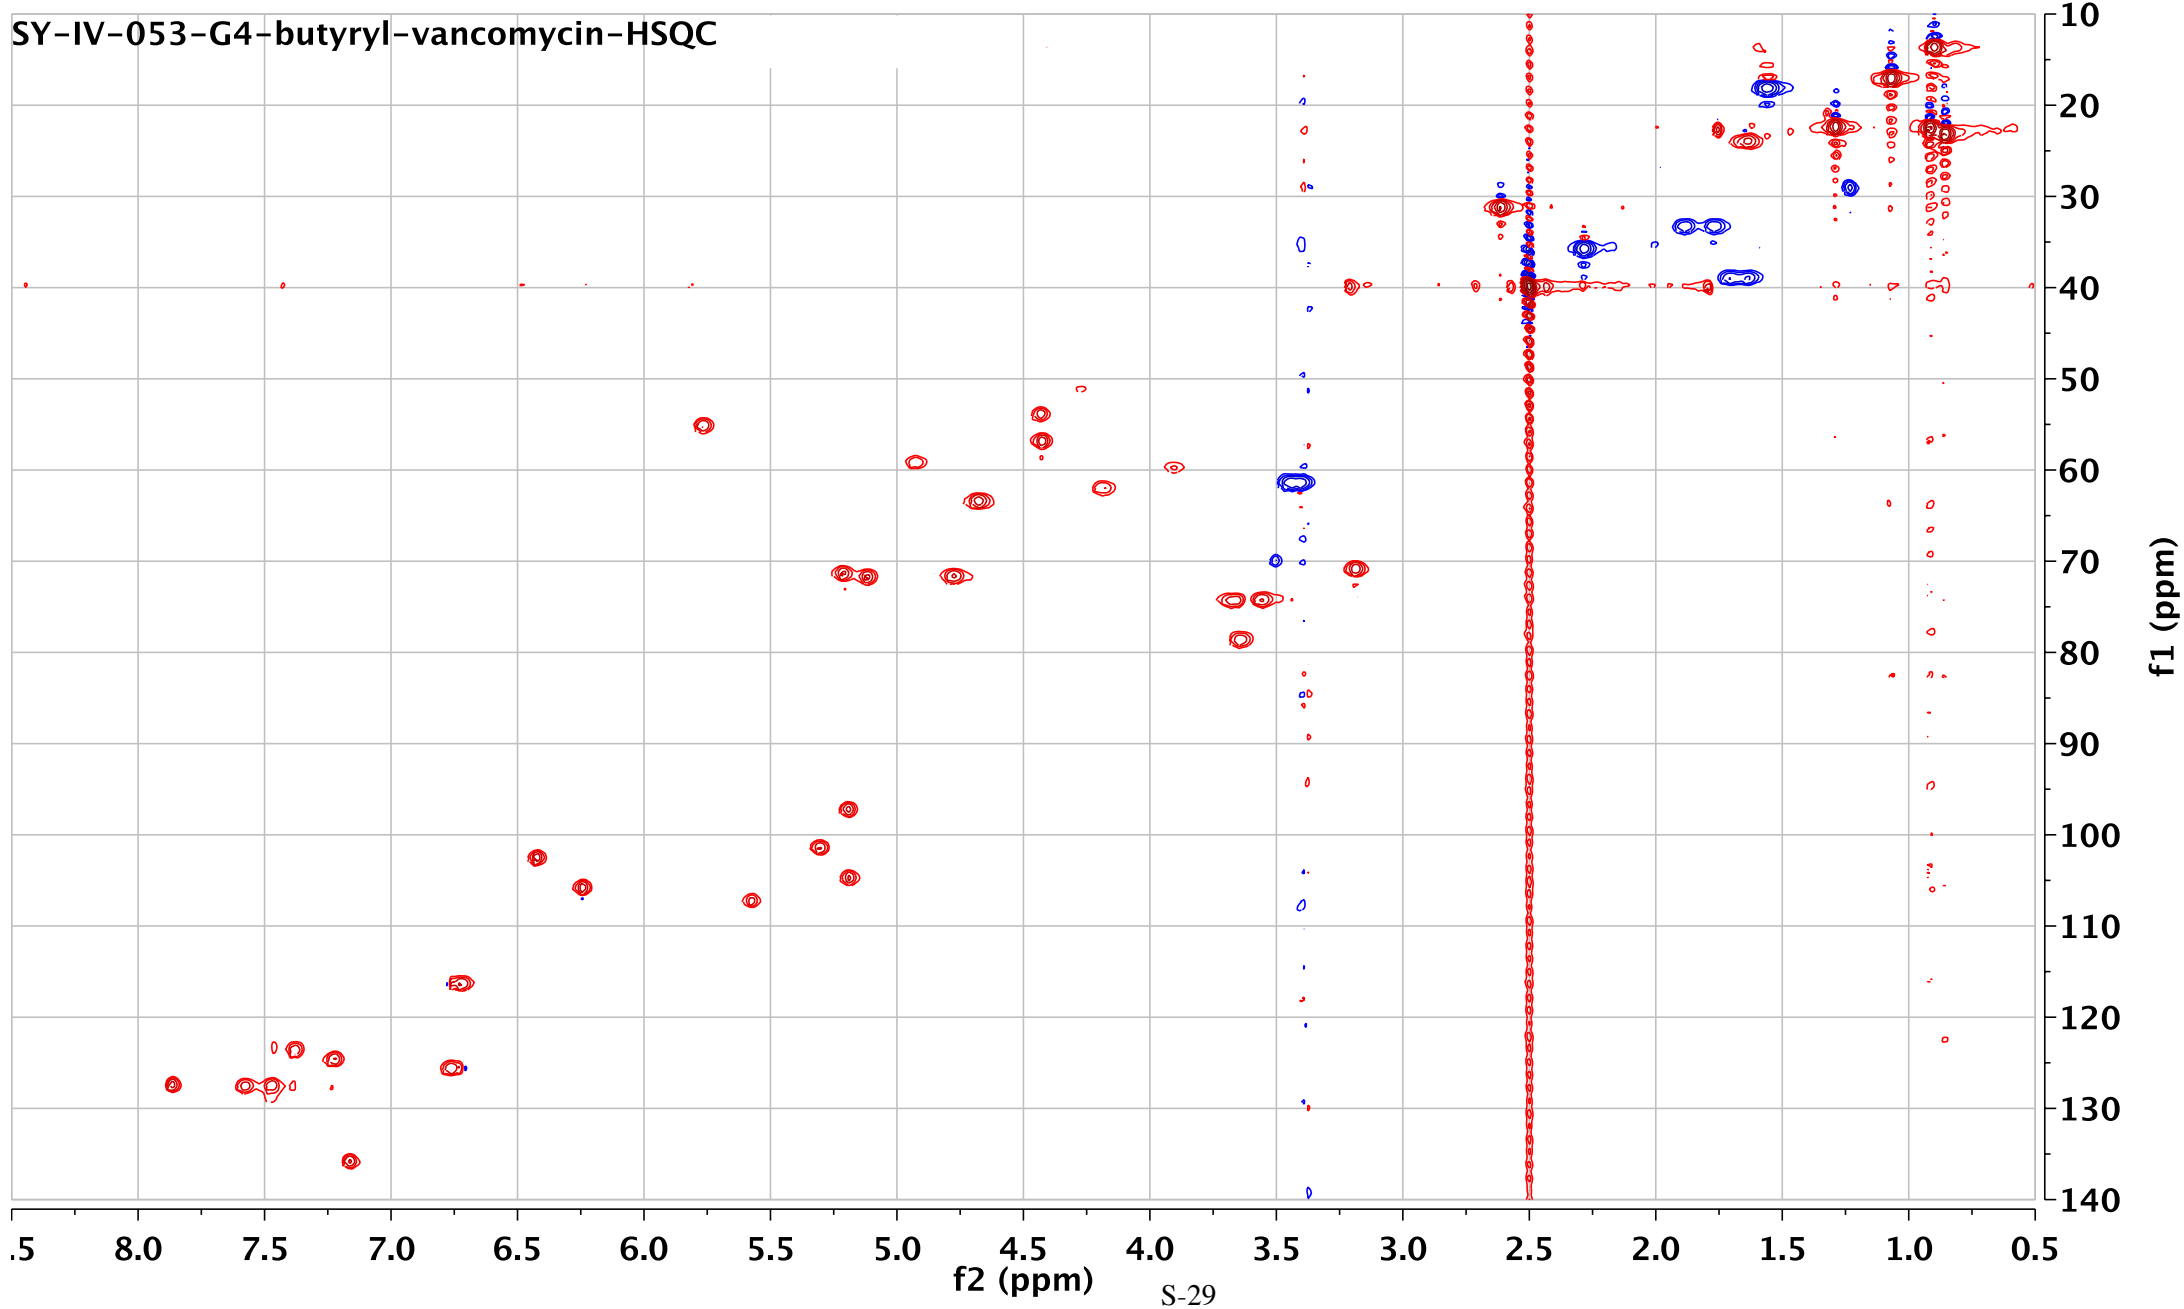

SY-III-259-G4-pentanoyl-vancomycin

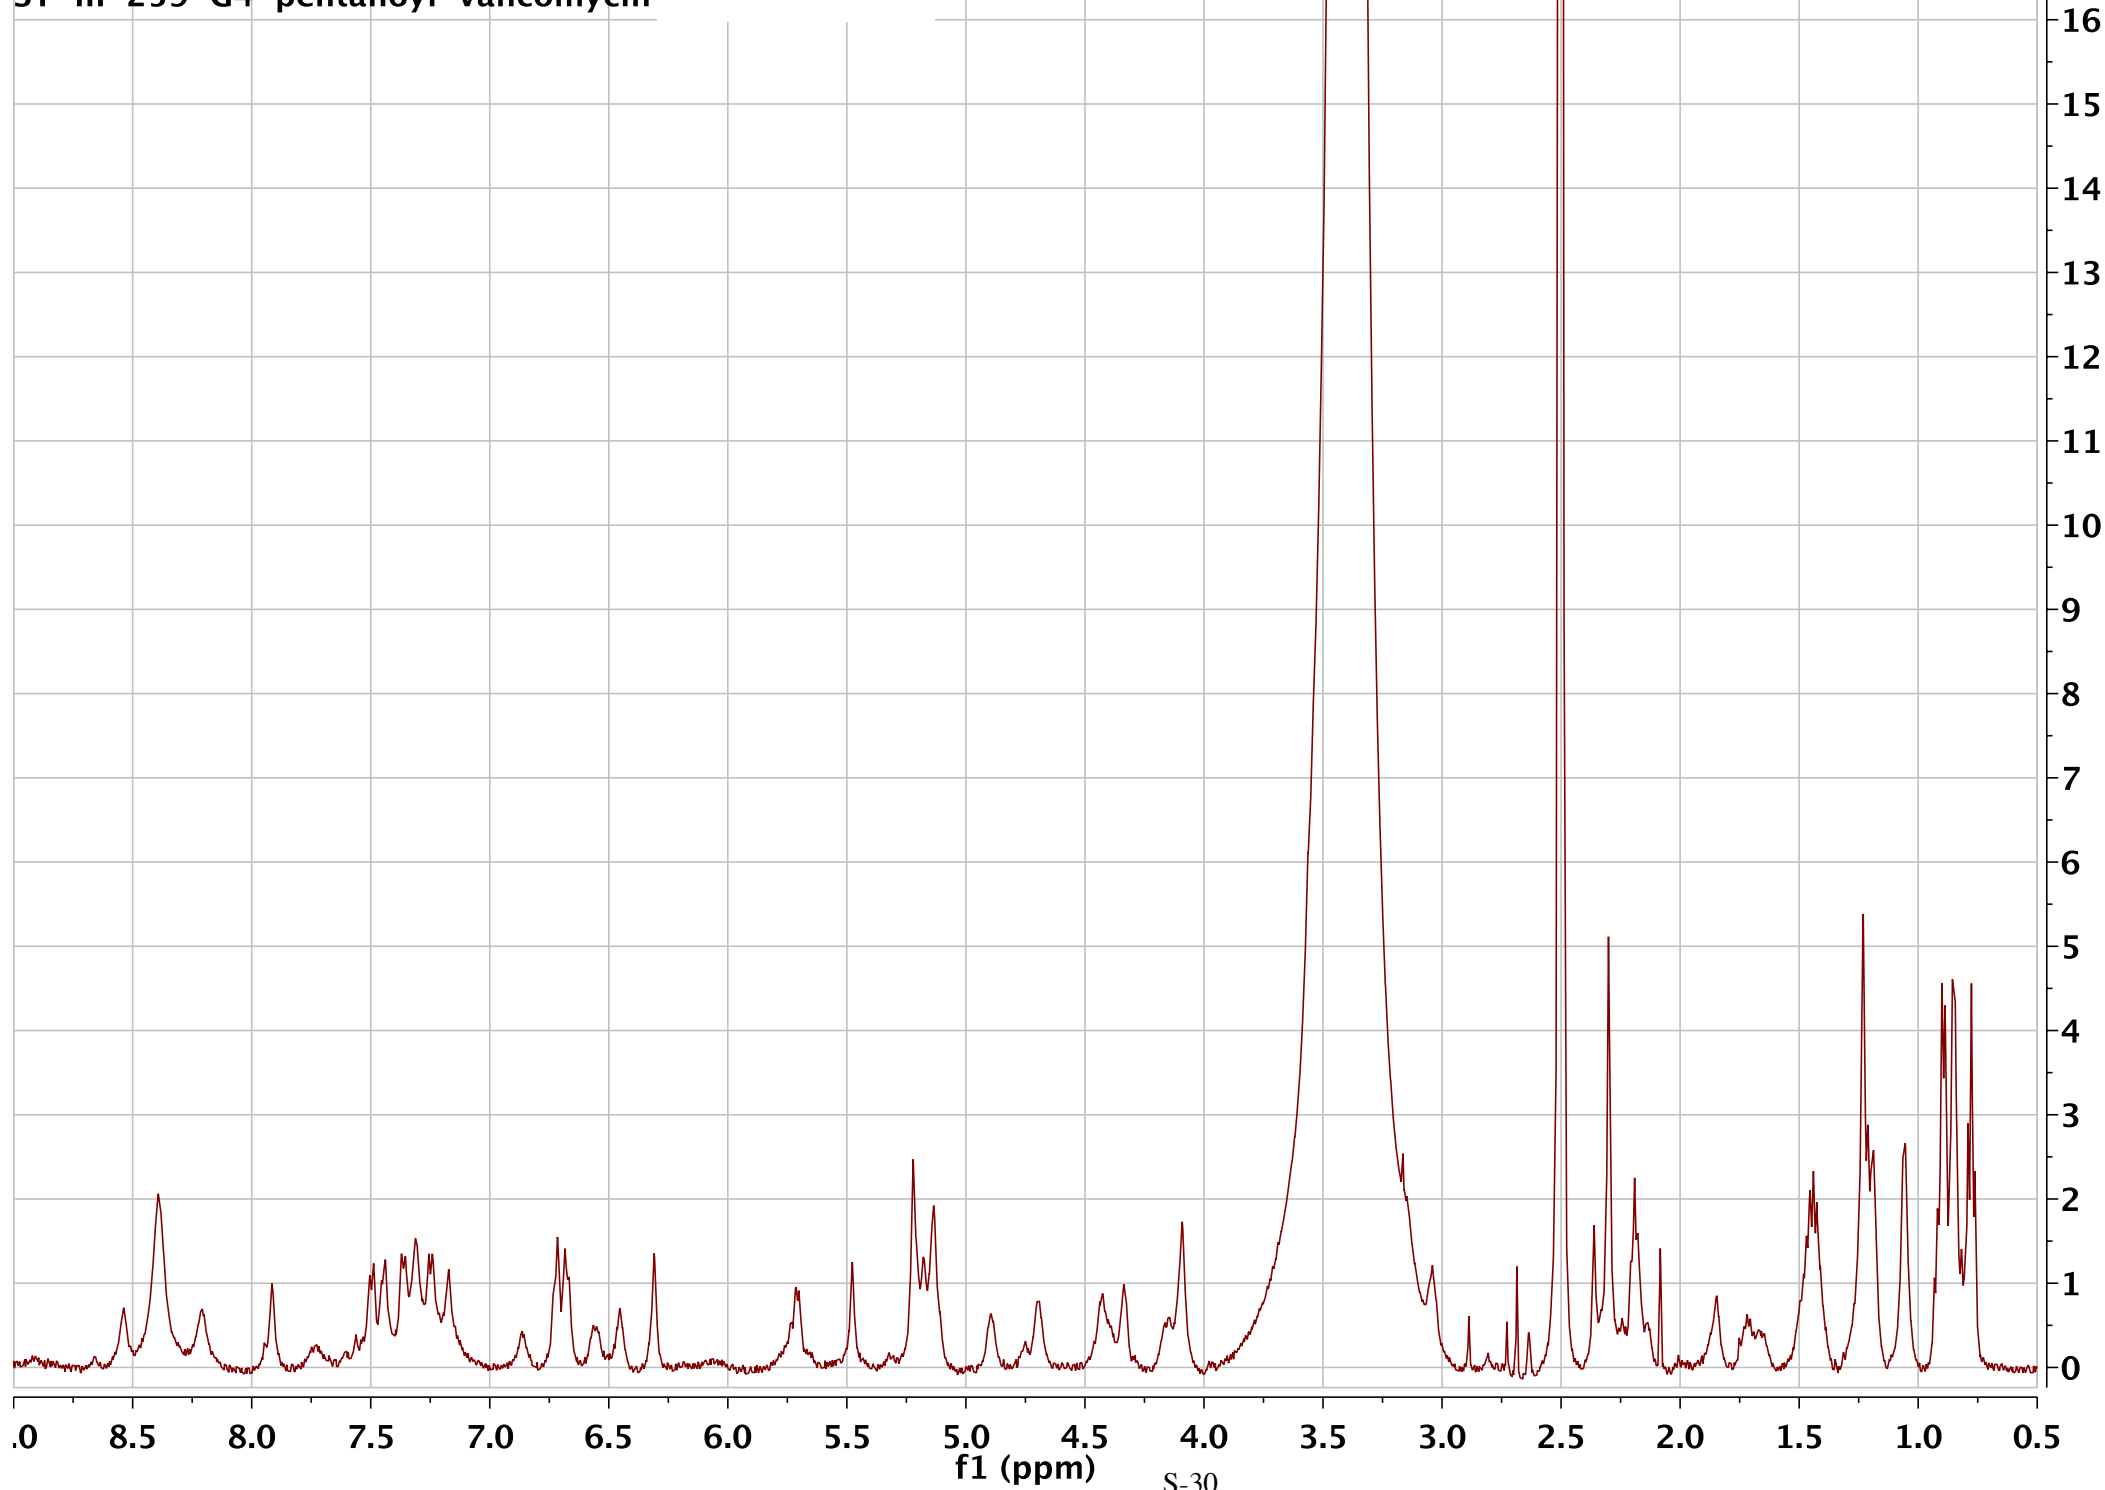

SY-IV-067-G4-pentanoyl-vancomycin-HSQC

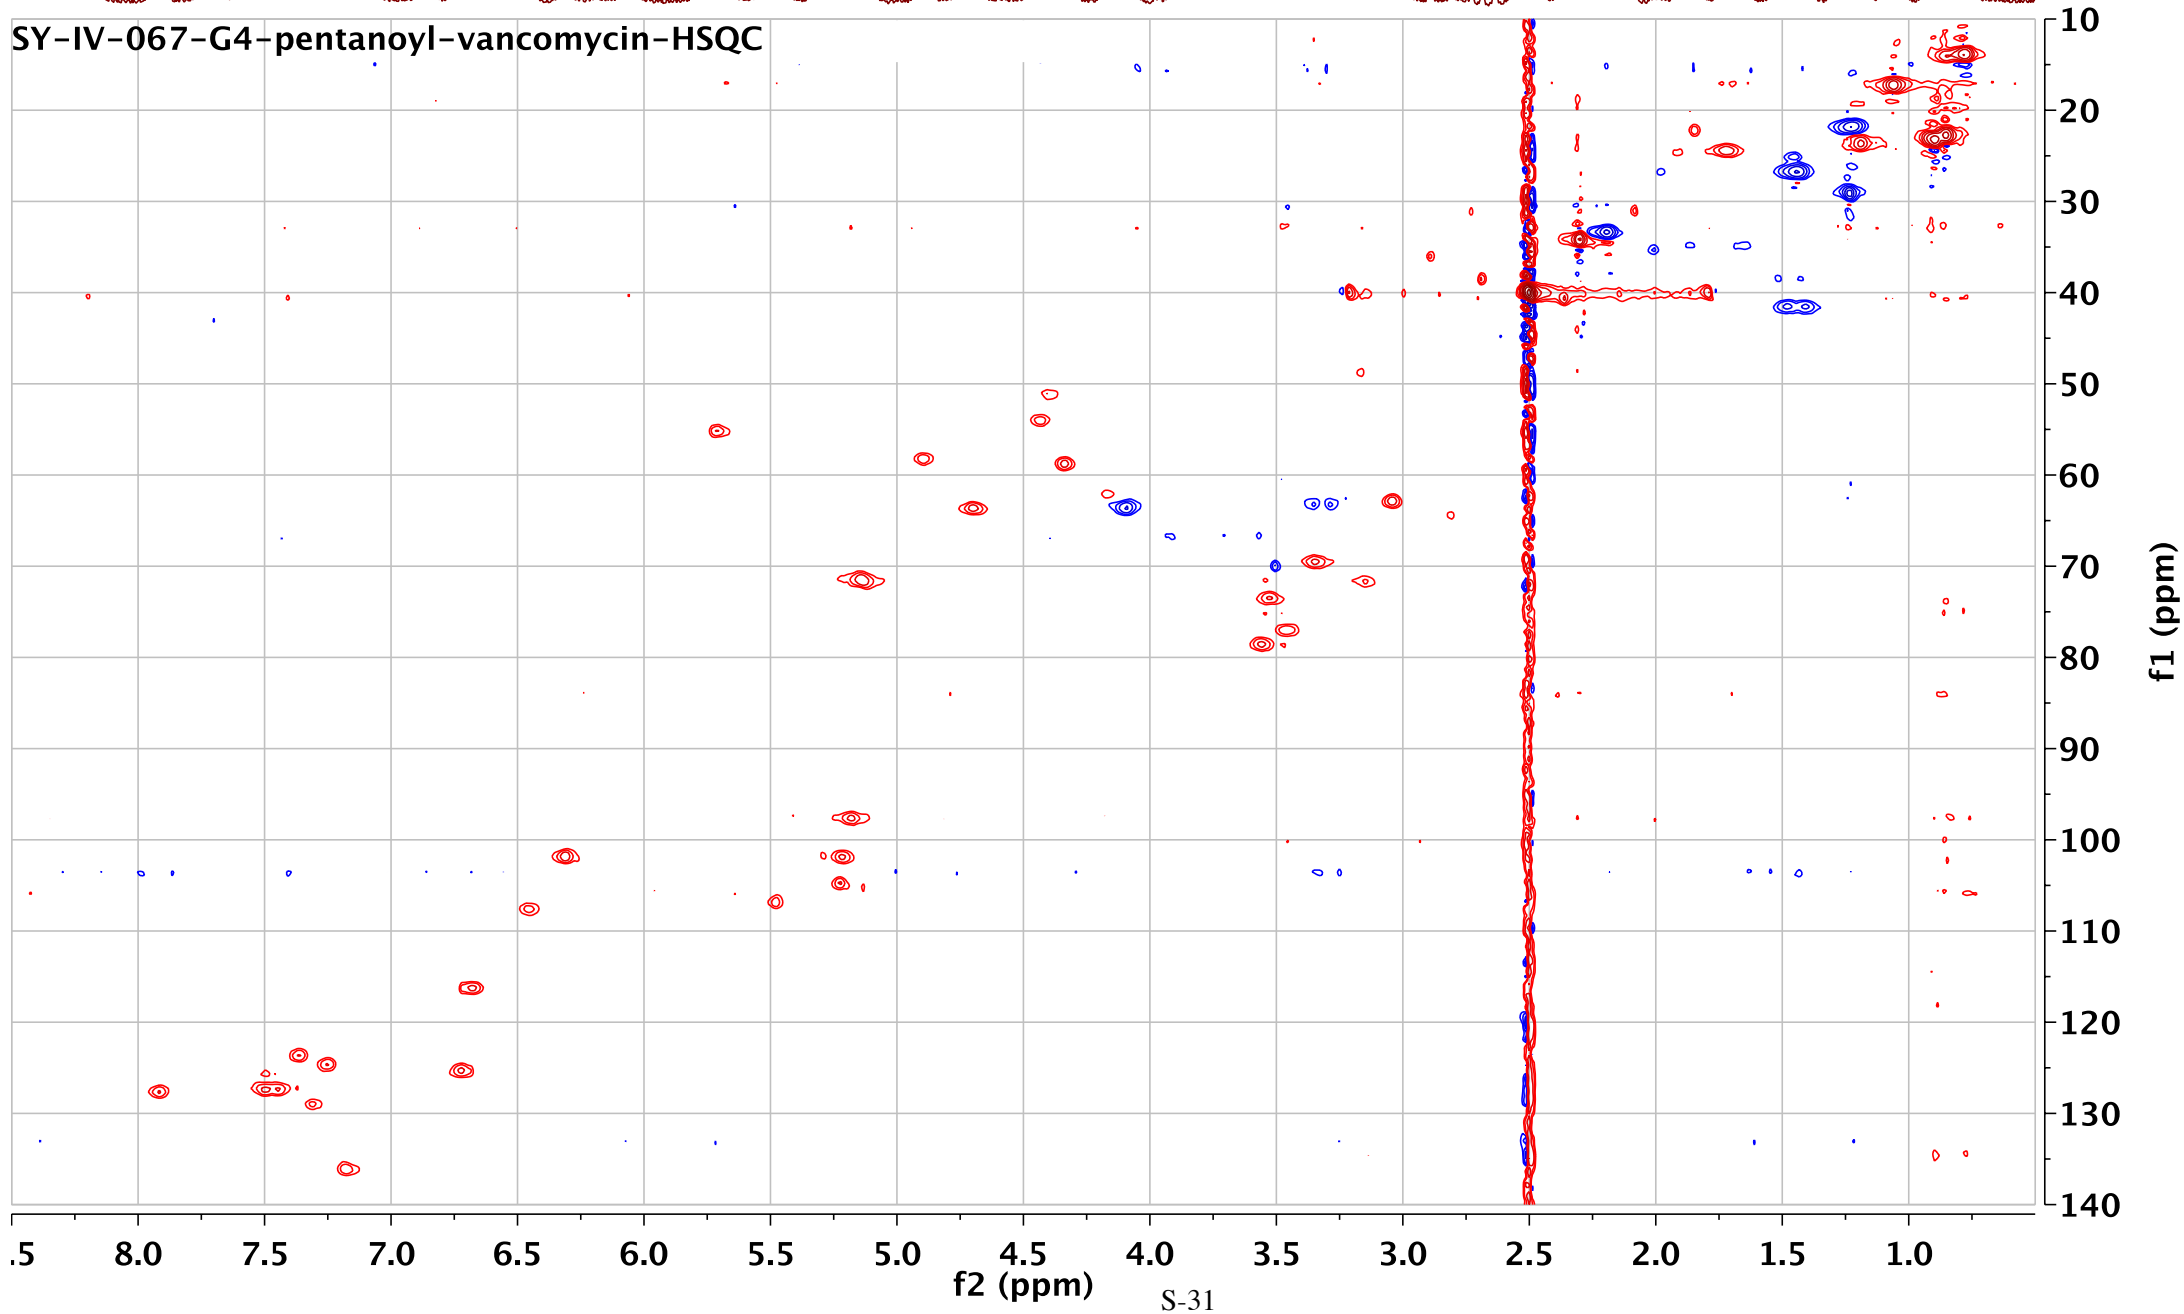

SY-IV-043-G4-hexanoyl-vancomycin

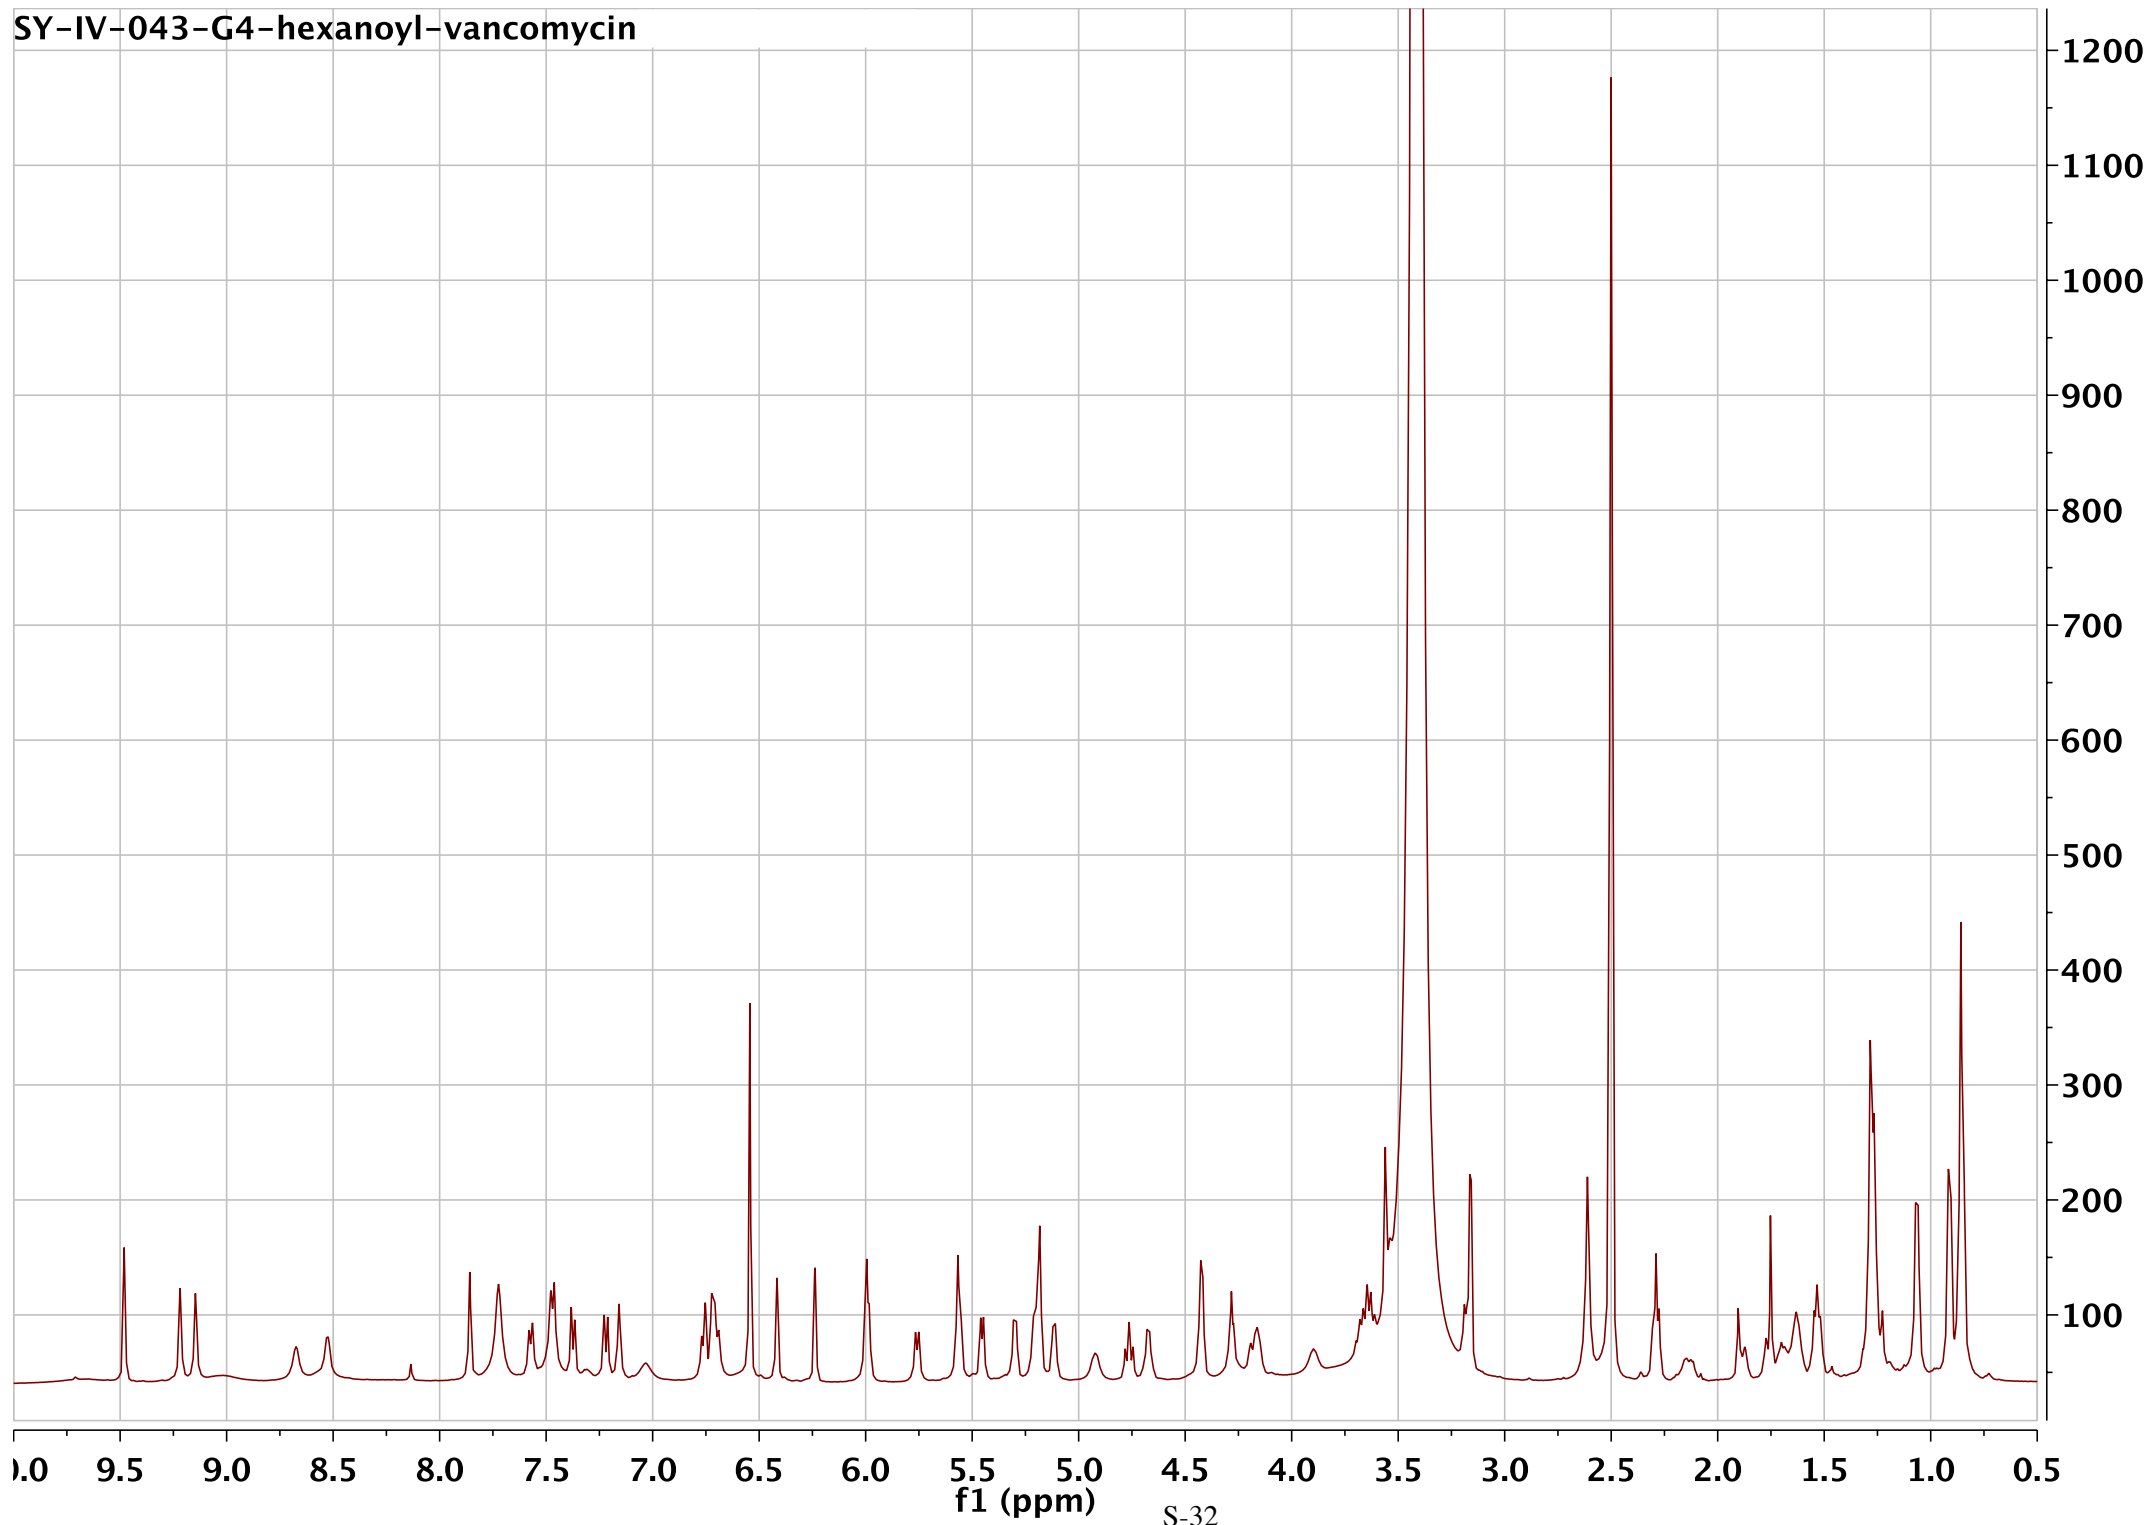



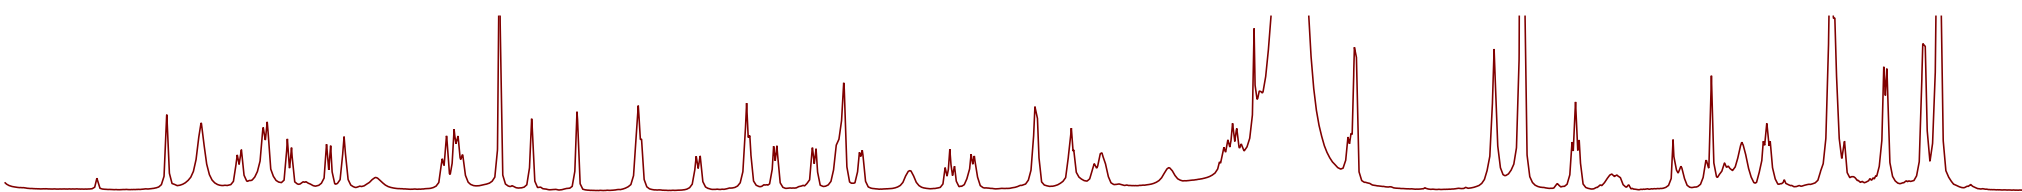

SY-IV-043-G4-hexanoyl-vancomycin-HSQC

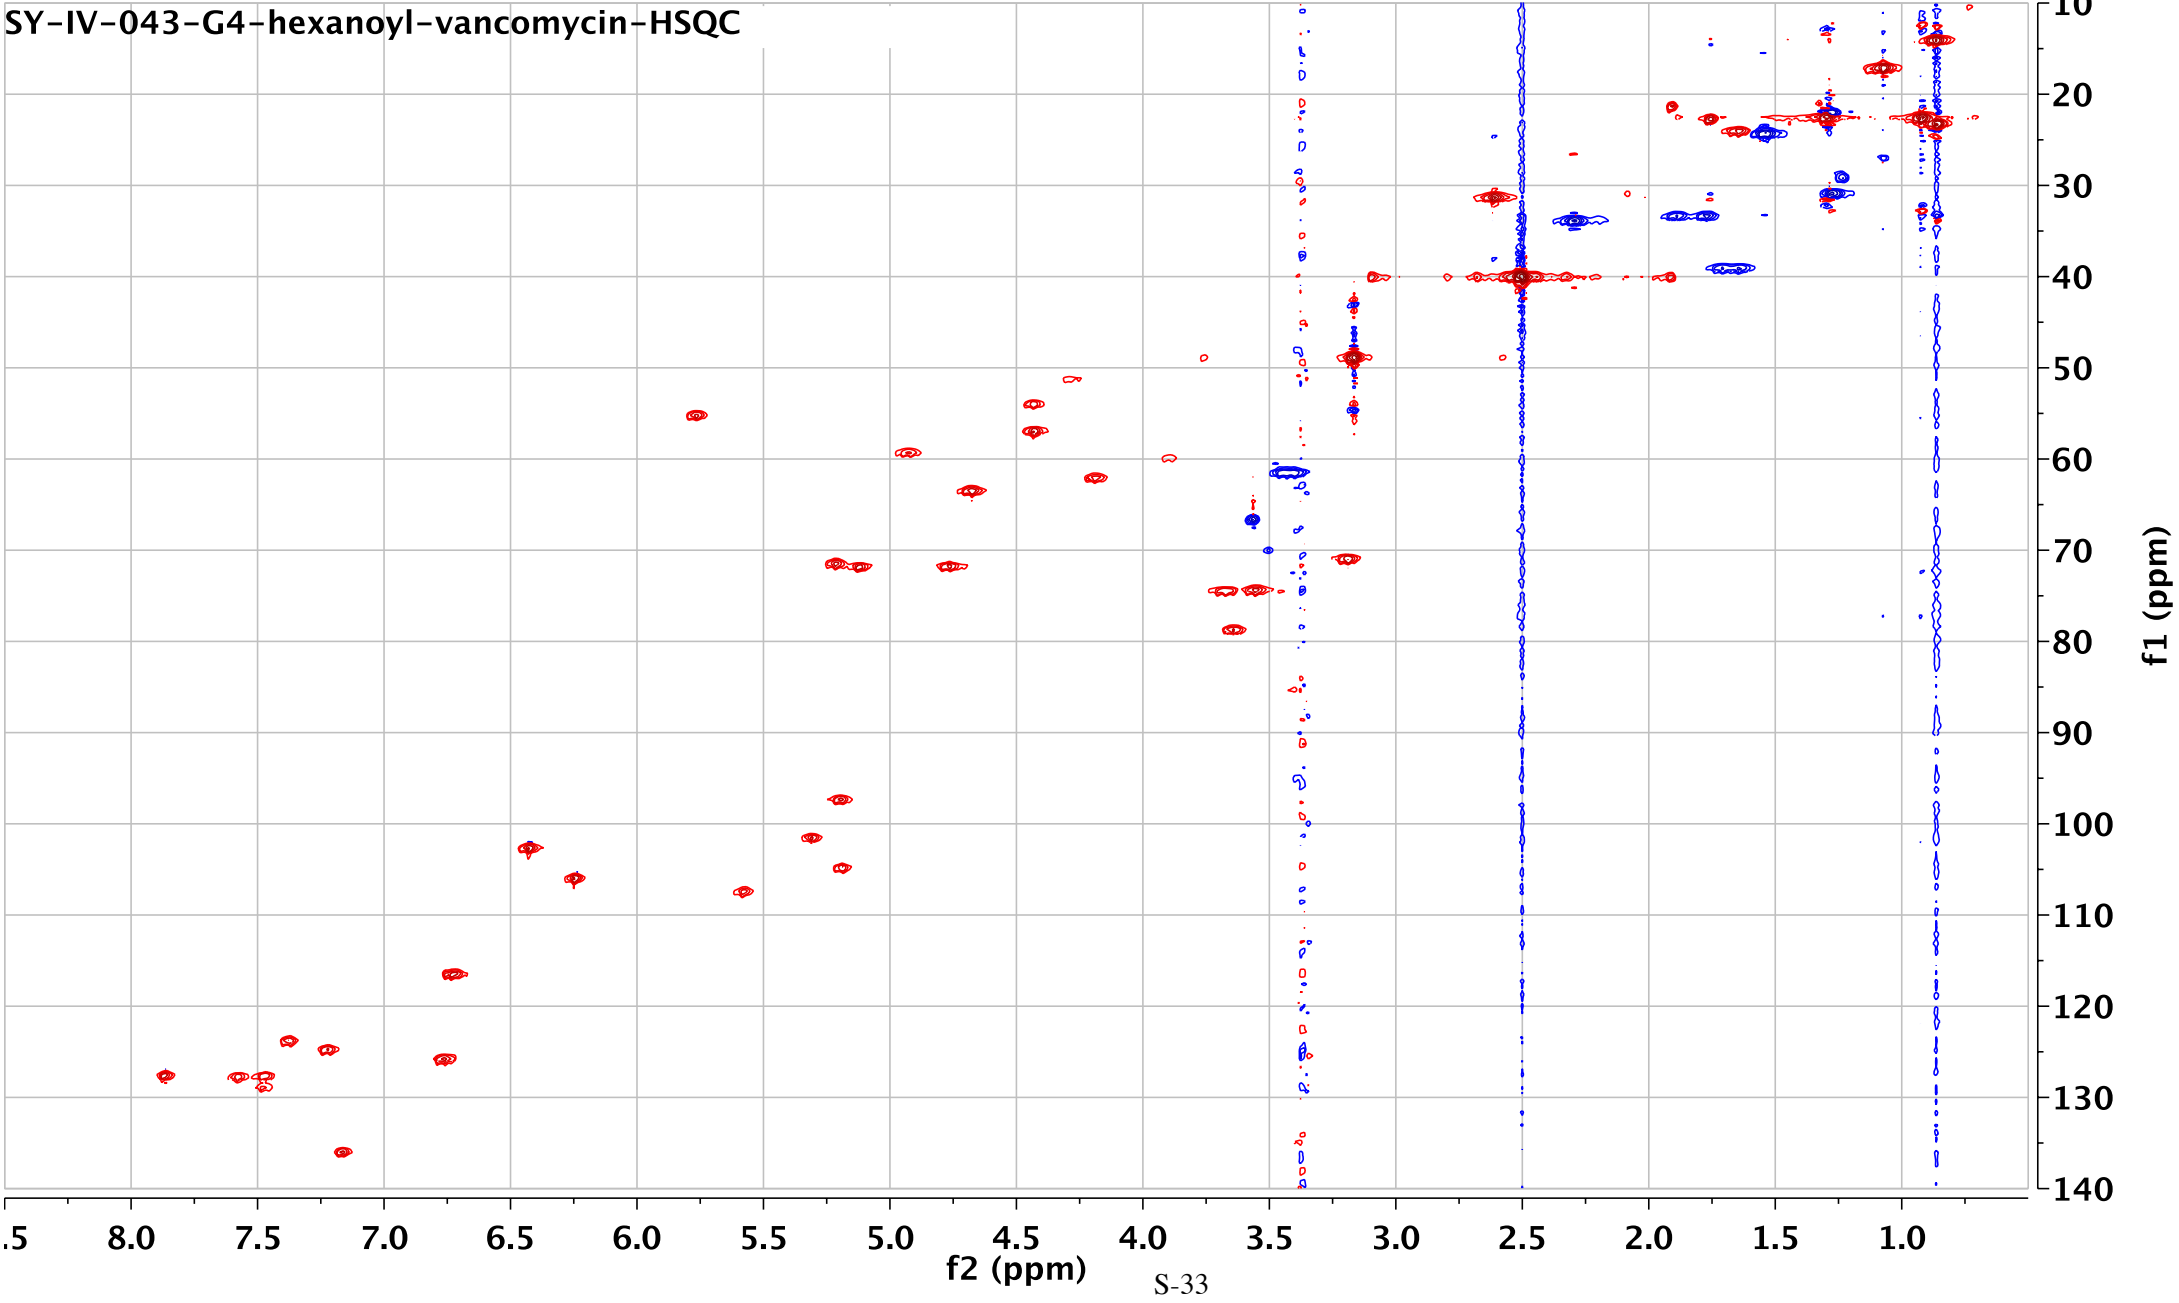

SY-IV-055-G4-octanoyl-vancomycin

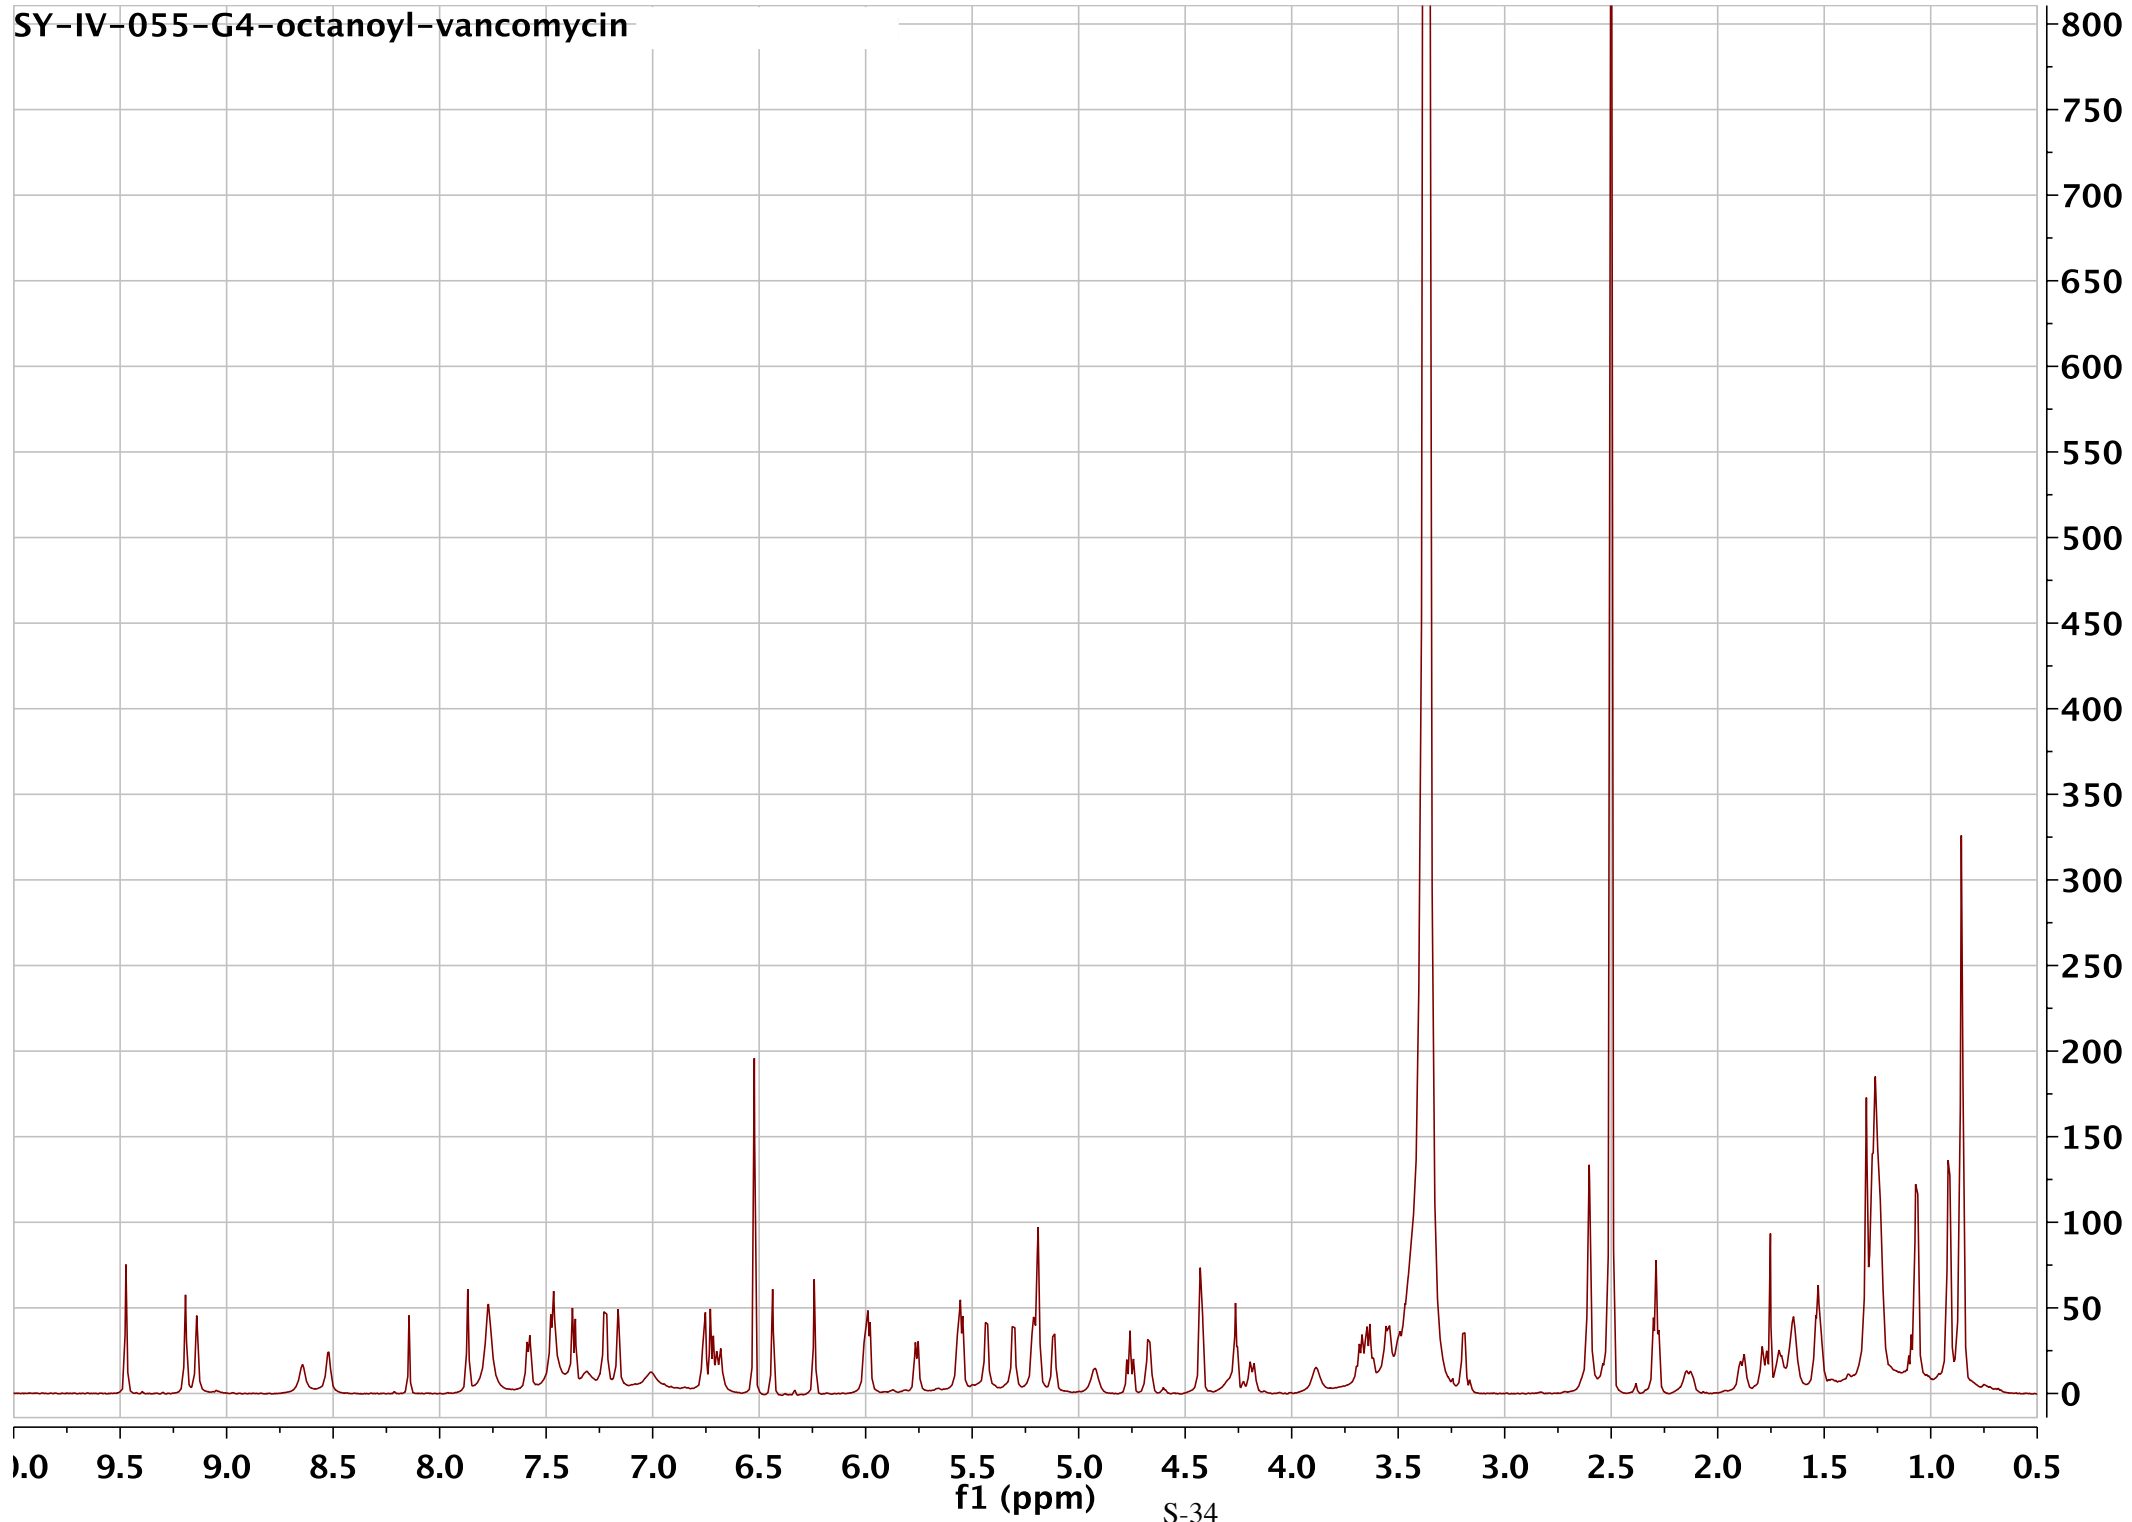

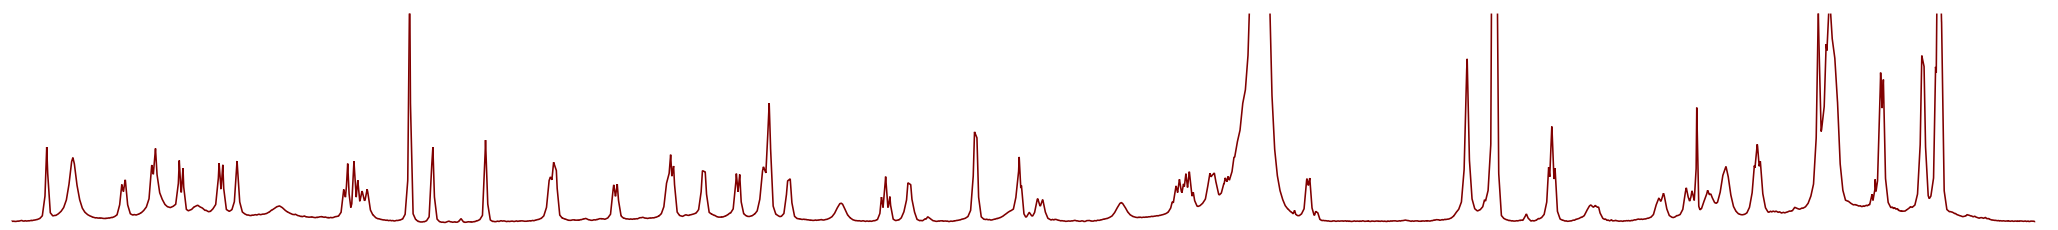

SY-IV-055-G4-octanoyl-vancomycin-HSQC

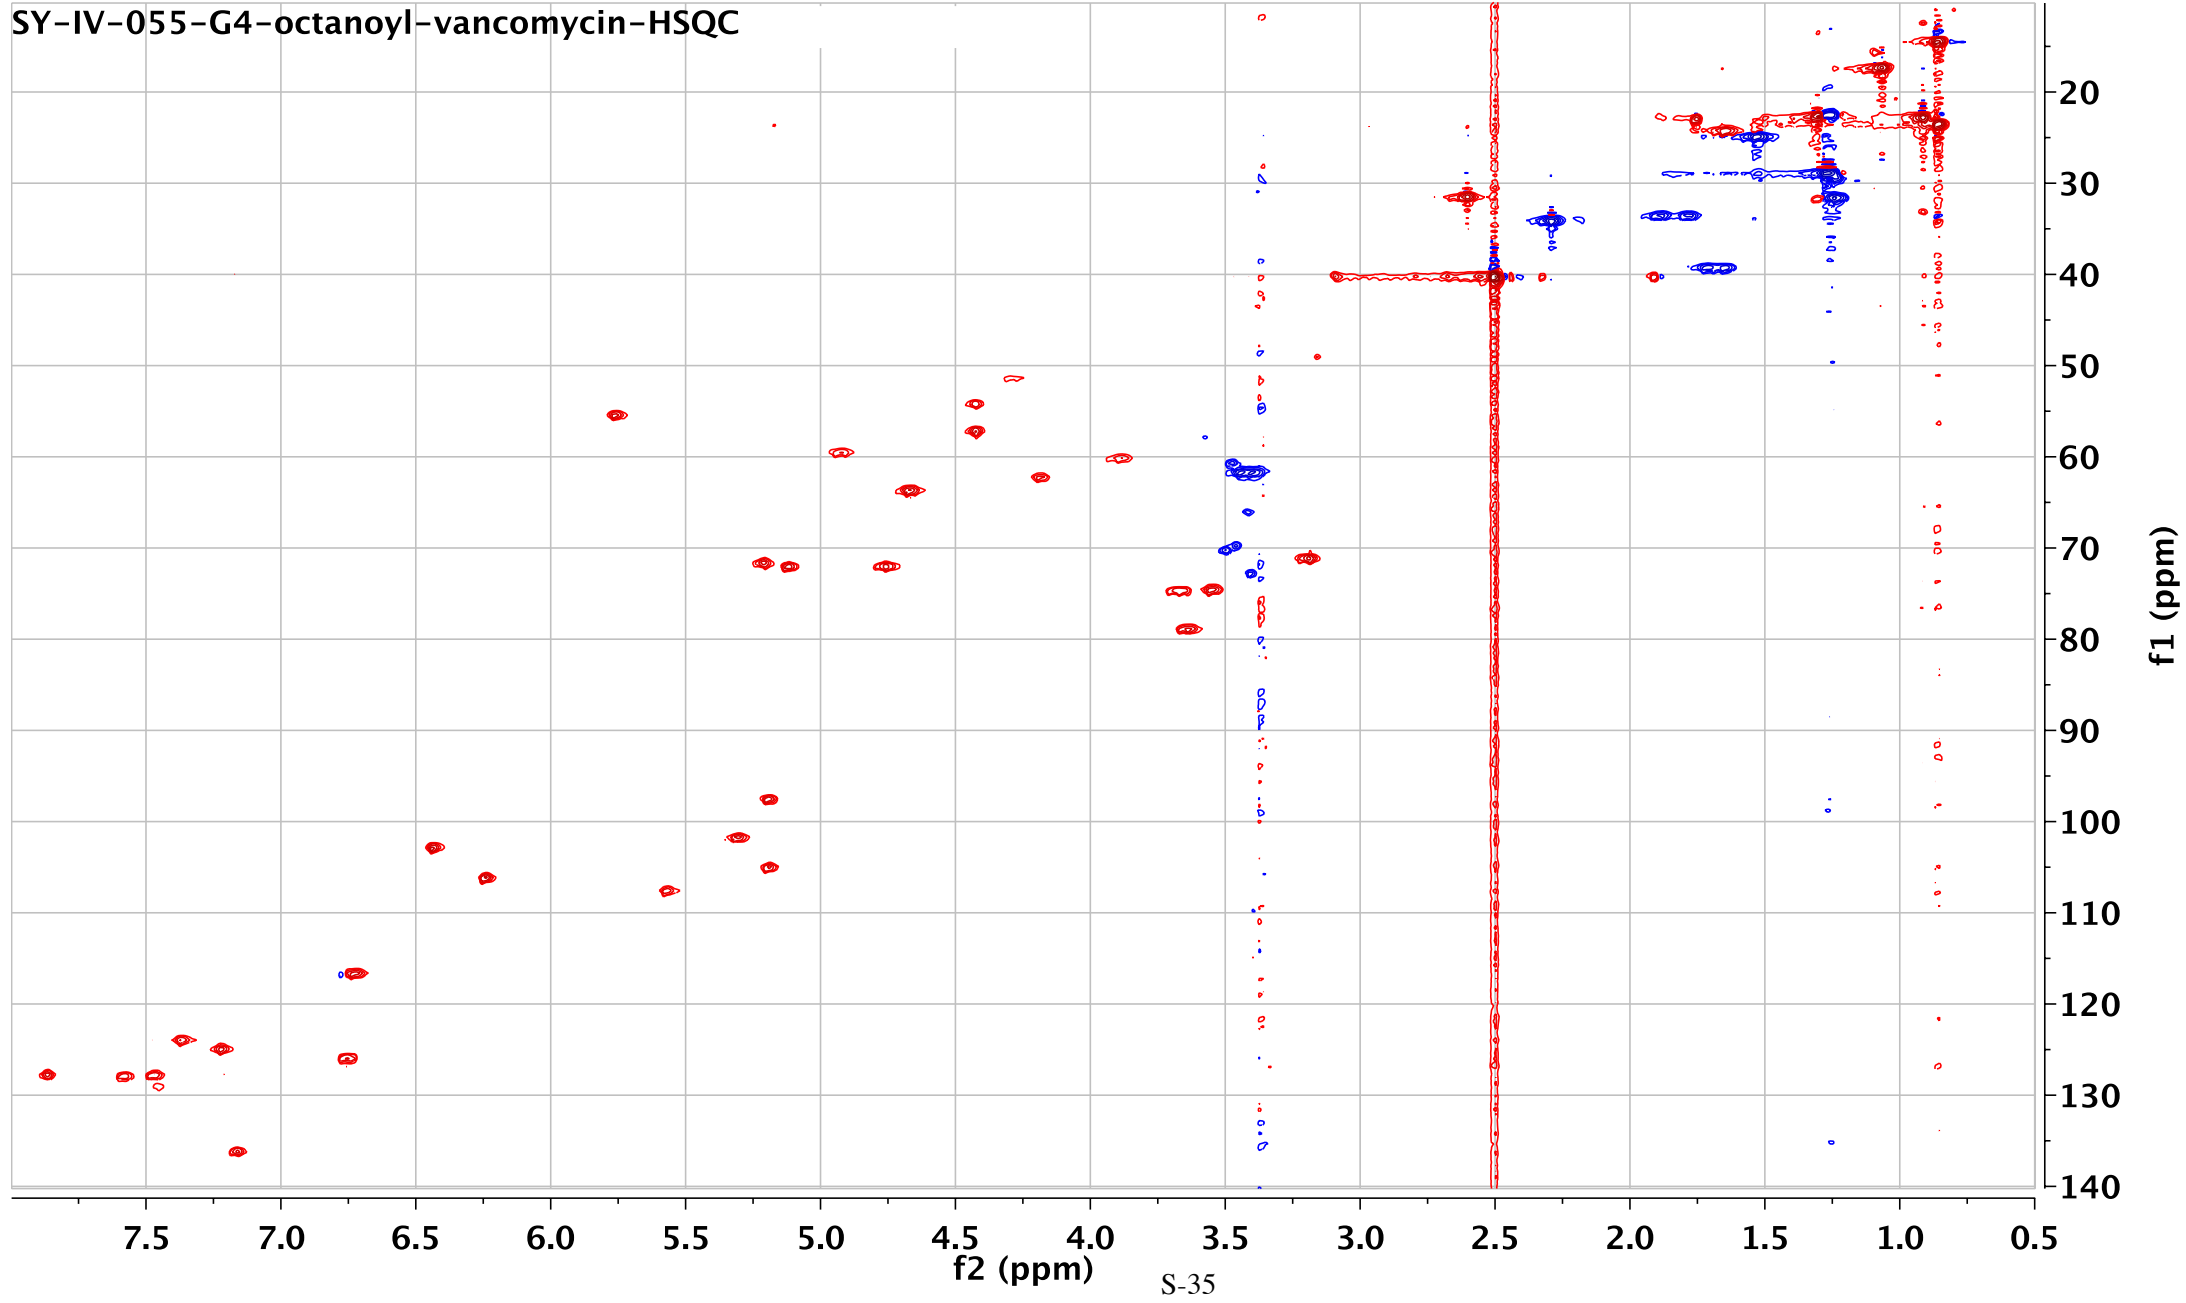

SY-IV-045-G4-decanoyl-vancomycin

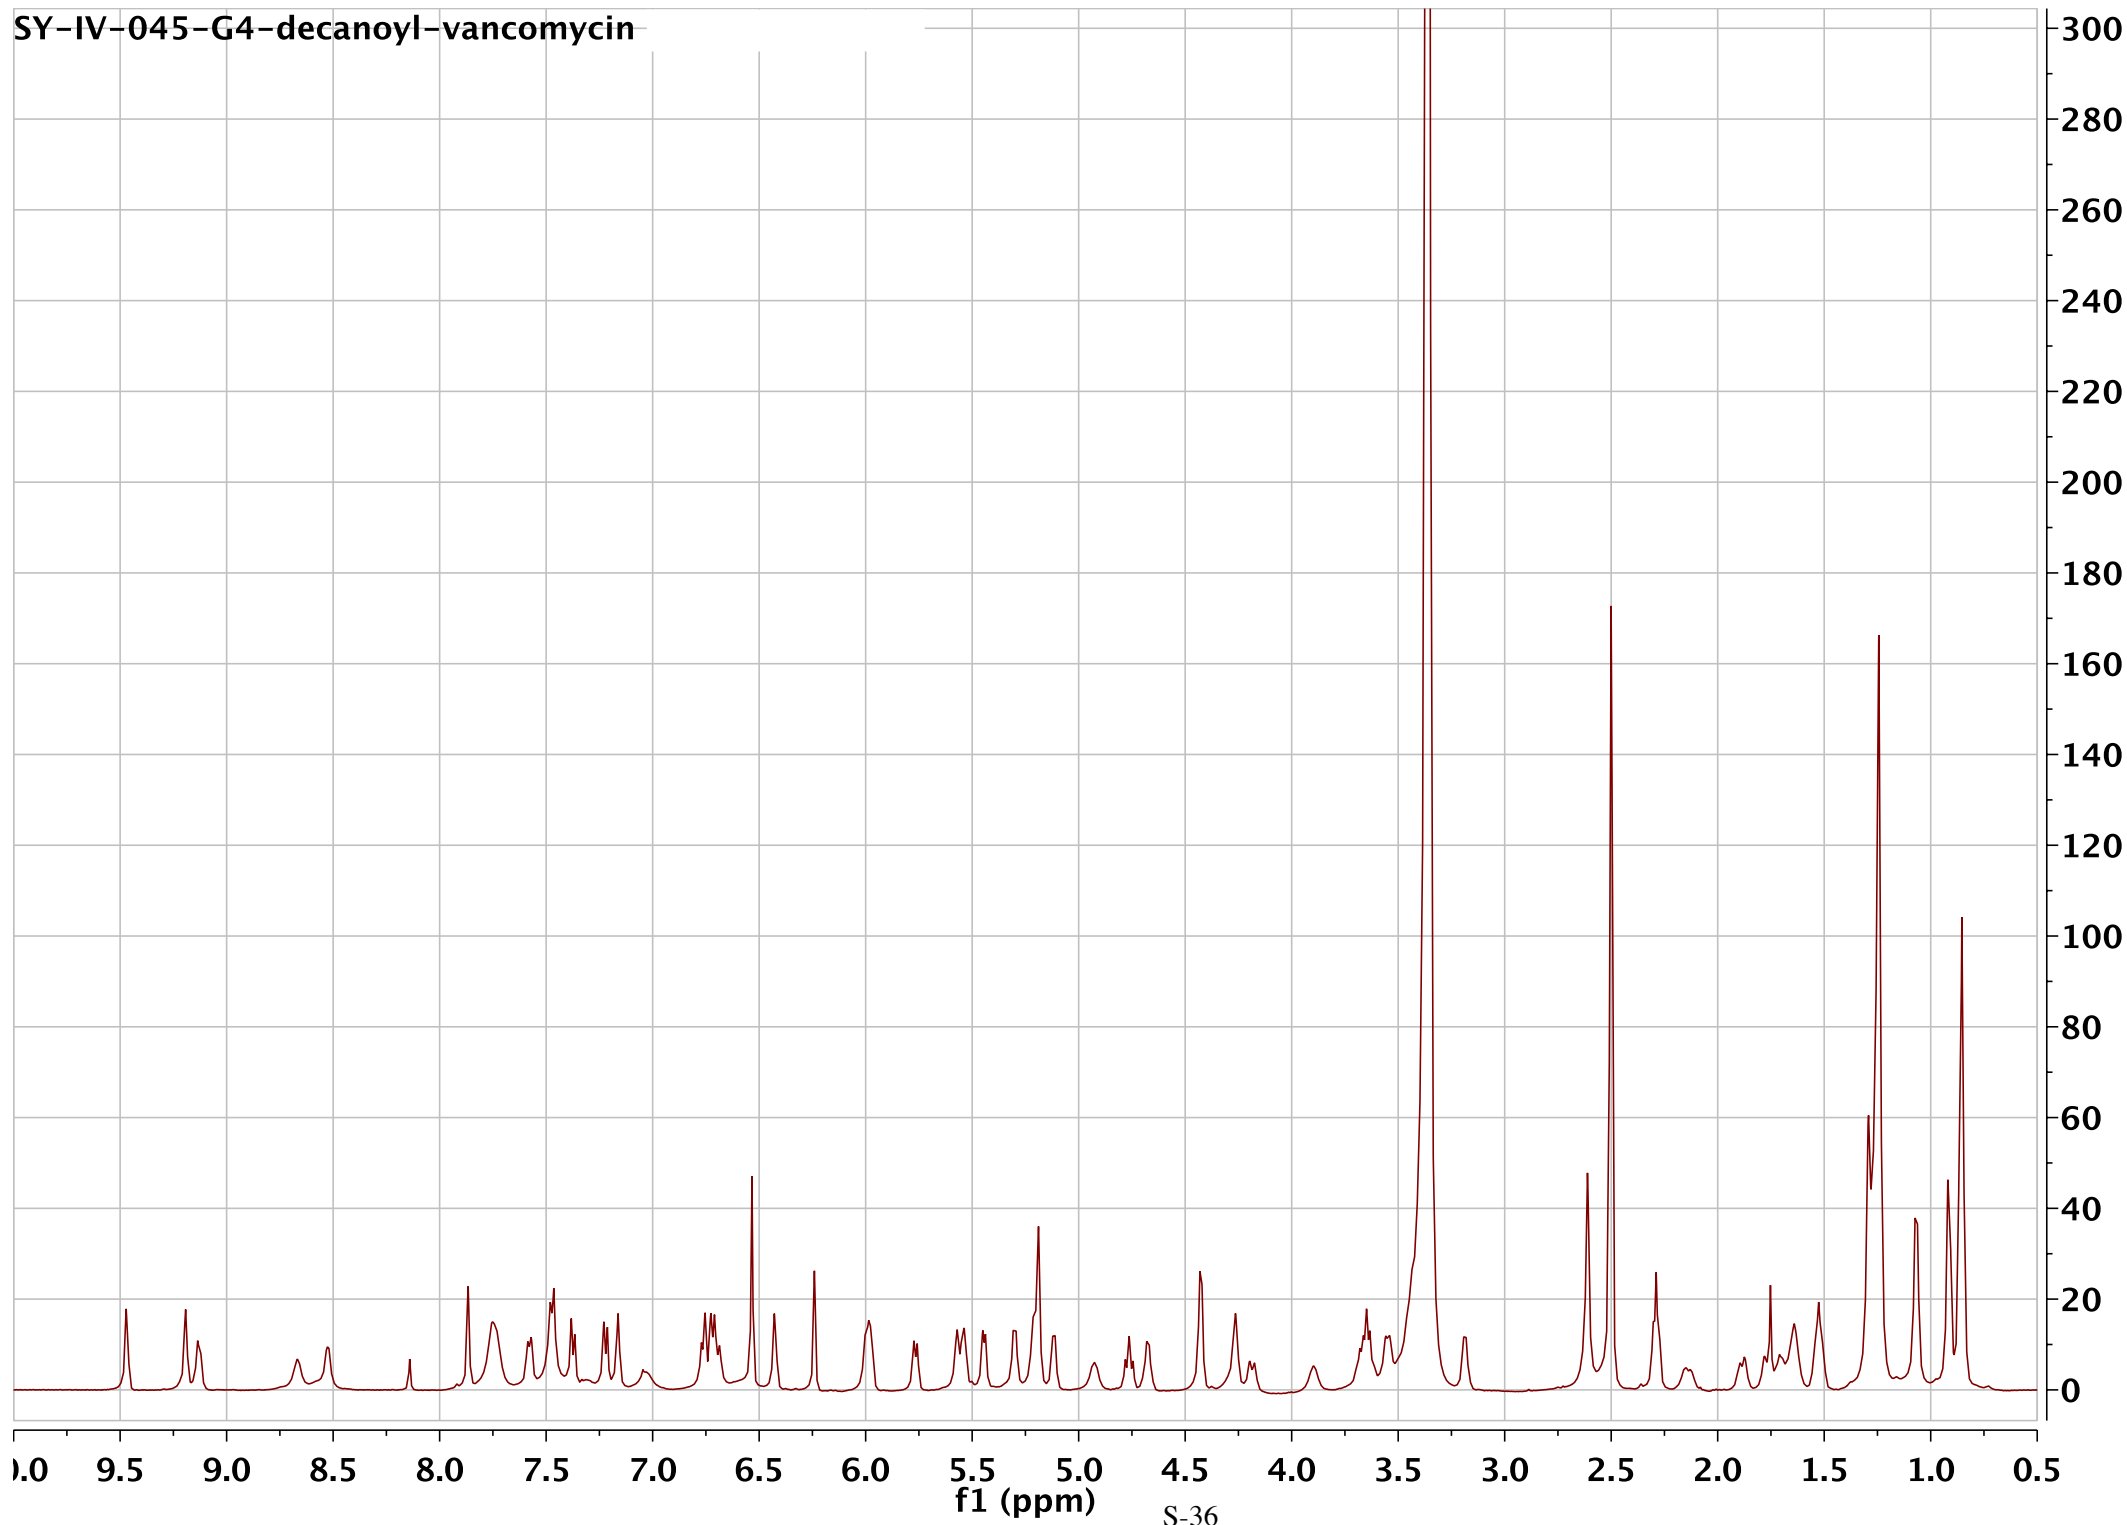

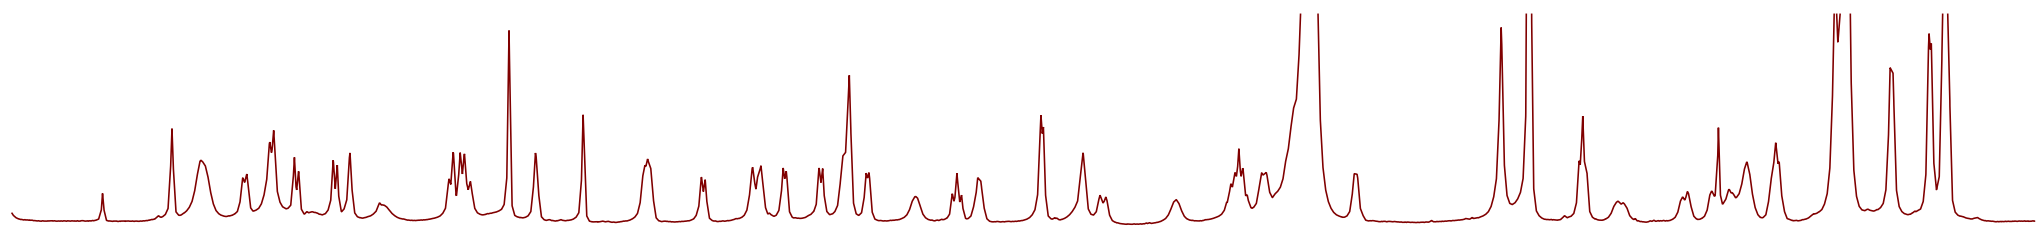

SY-IV-045-G4-decanoyl-vancomycin-HSQC

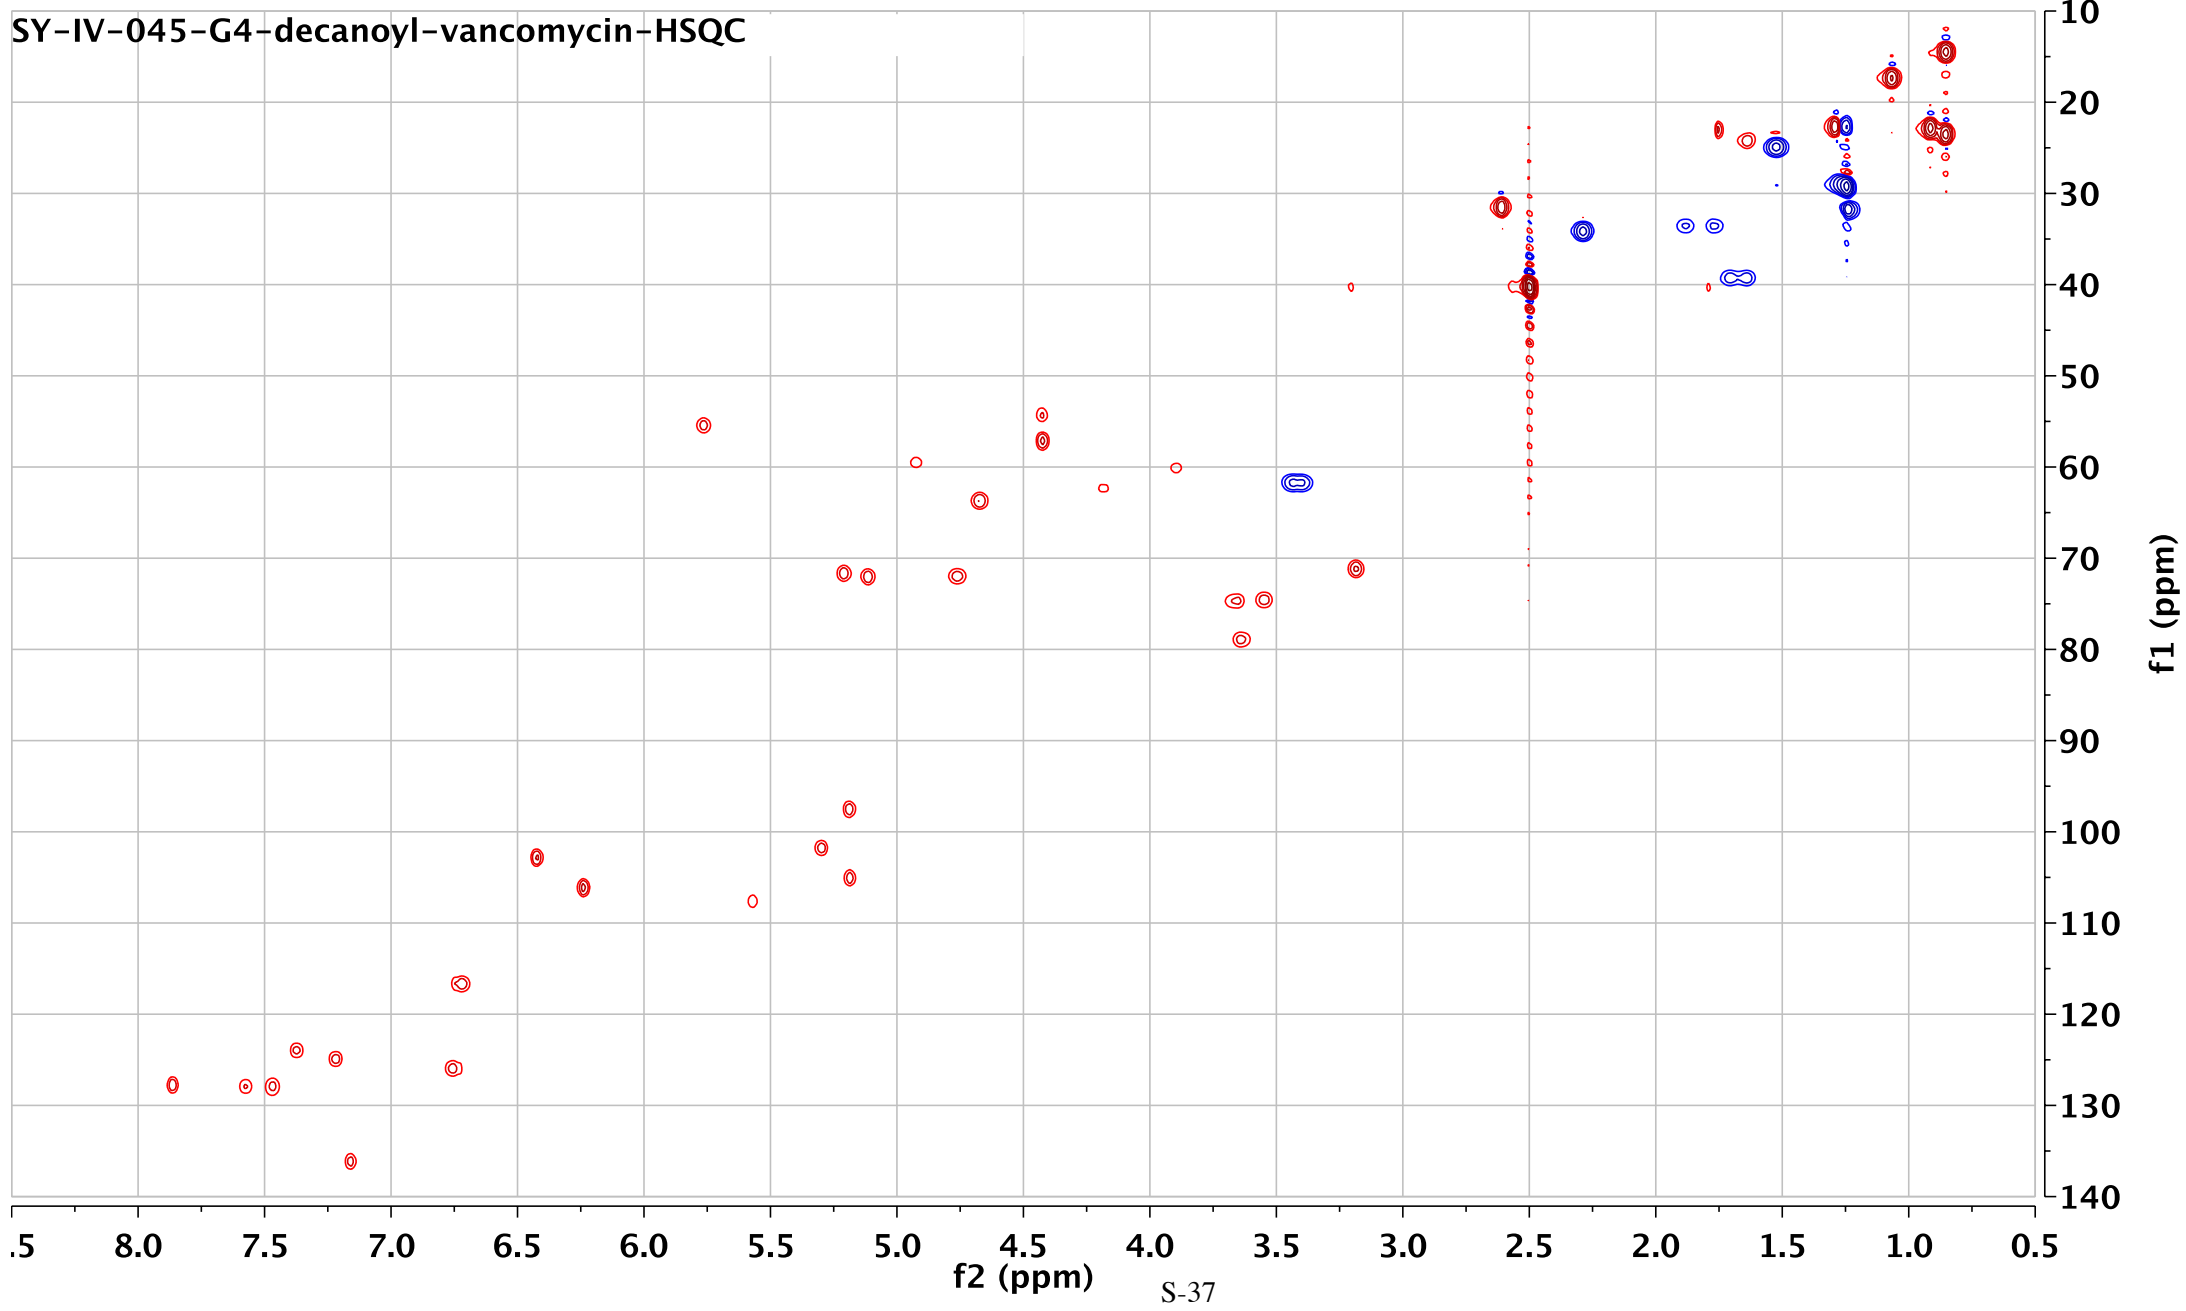

SY-IV-067-G4-pentenoyl-vancomycin

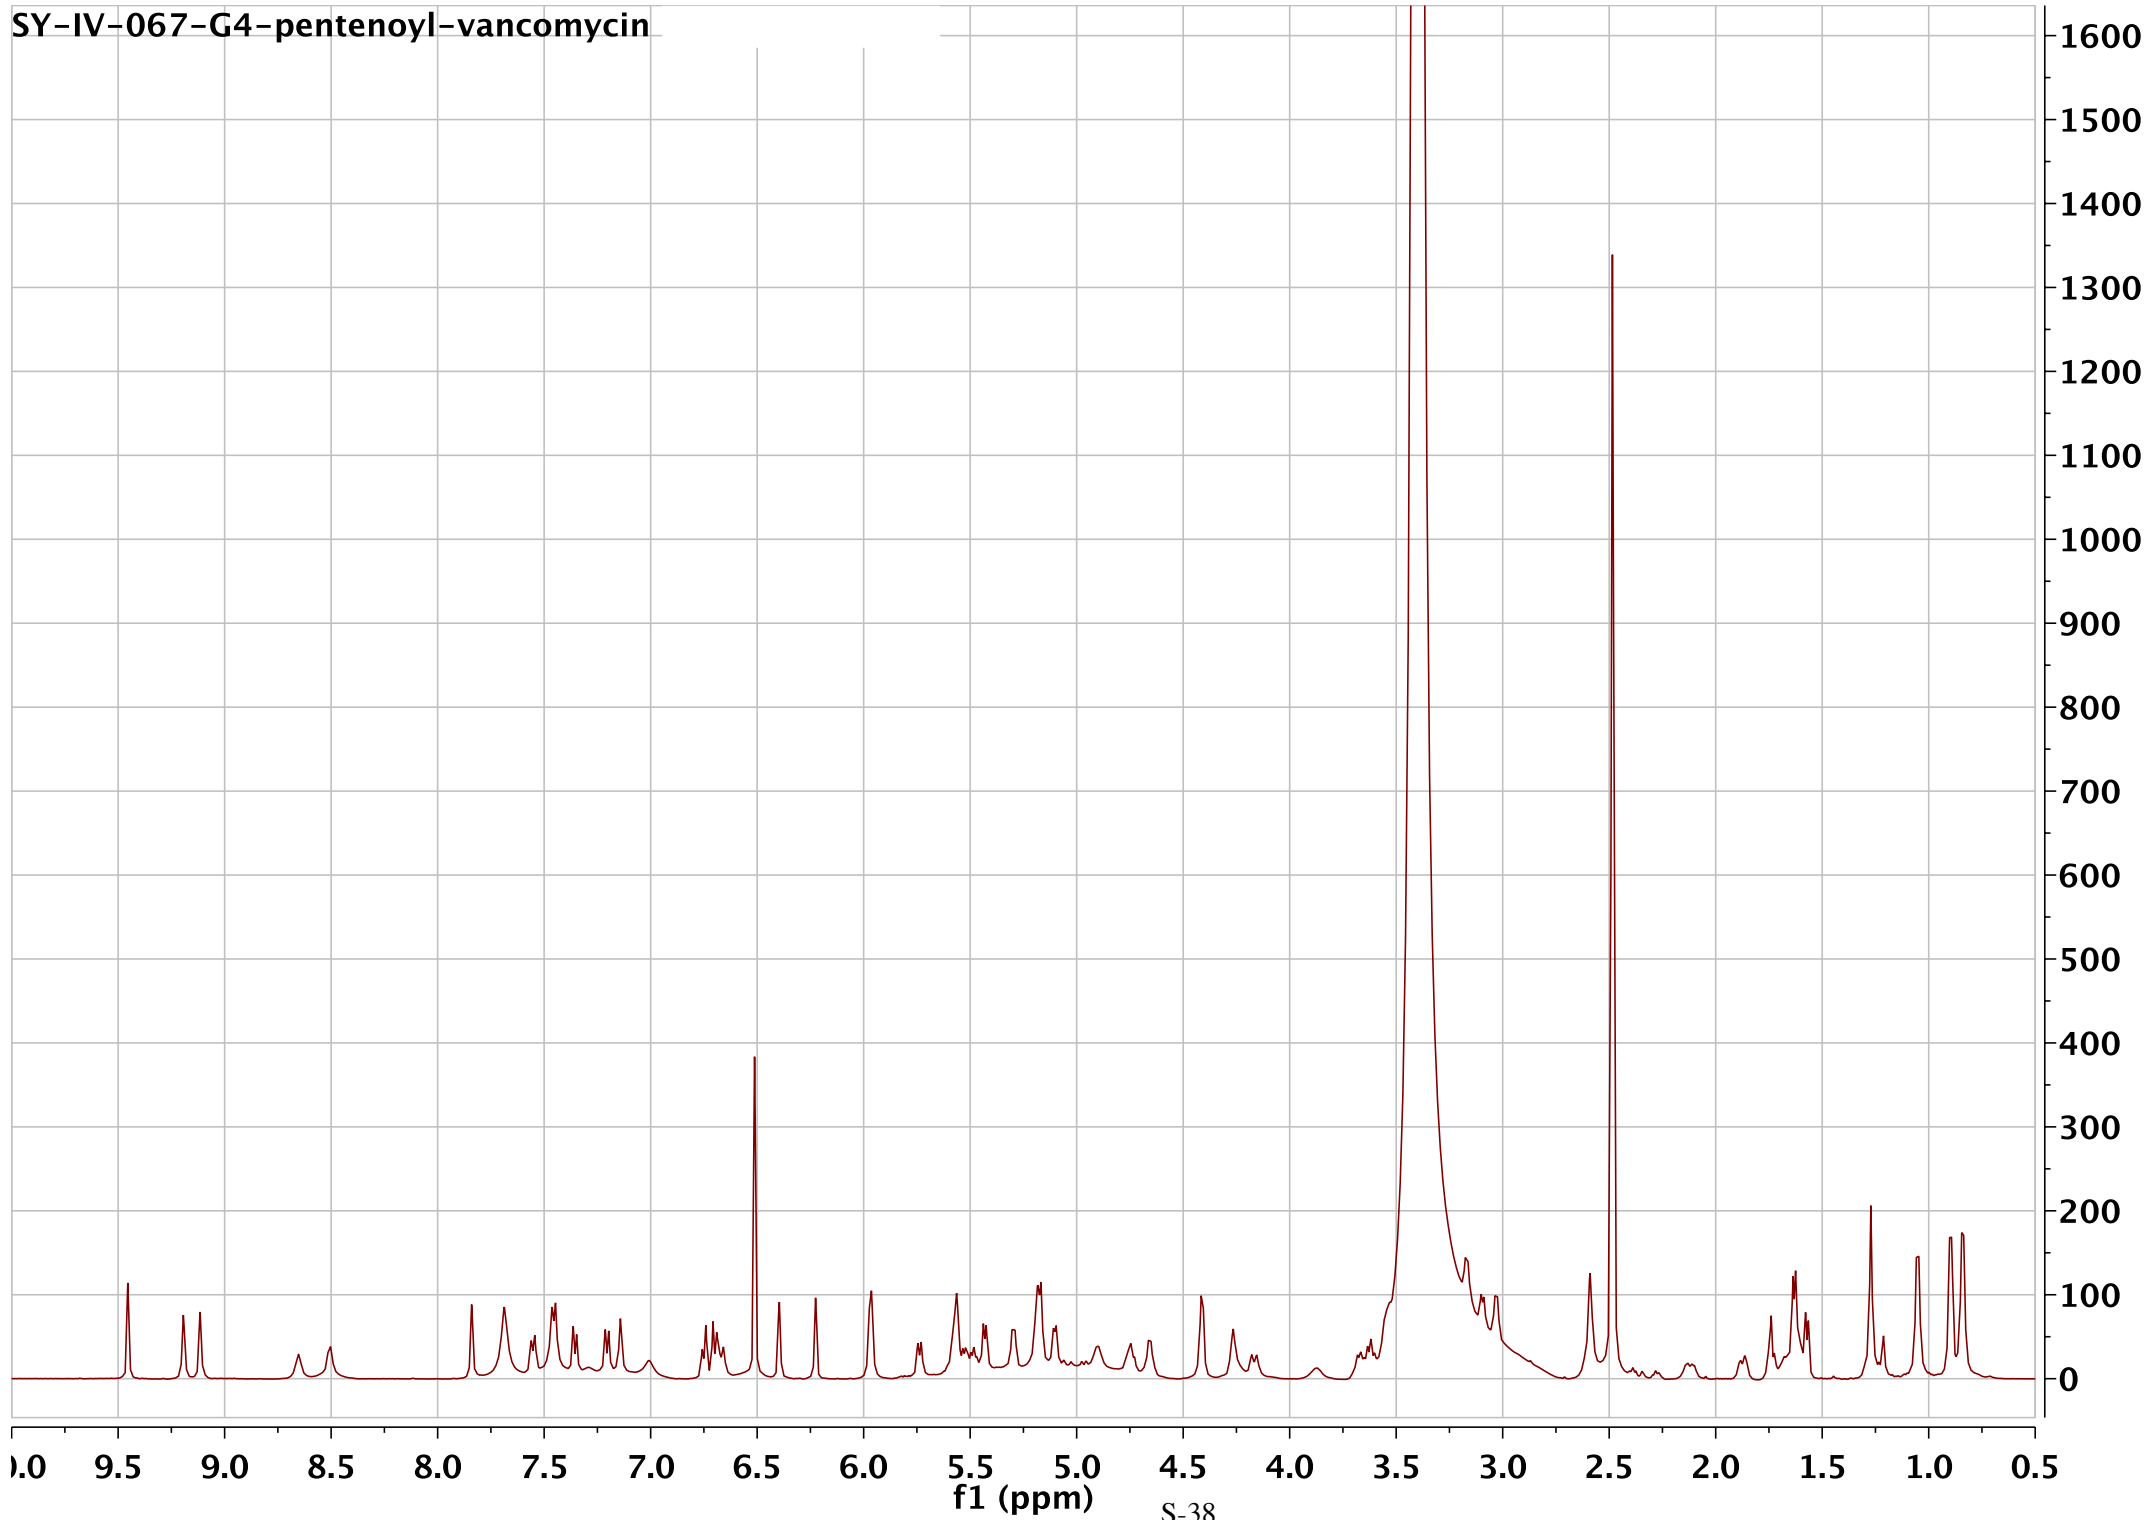

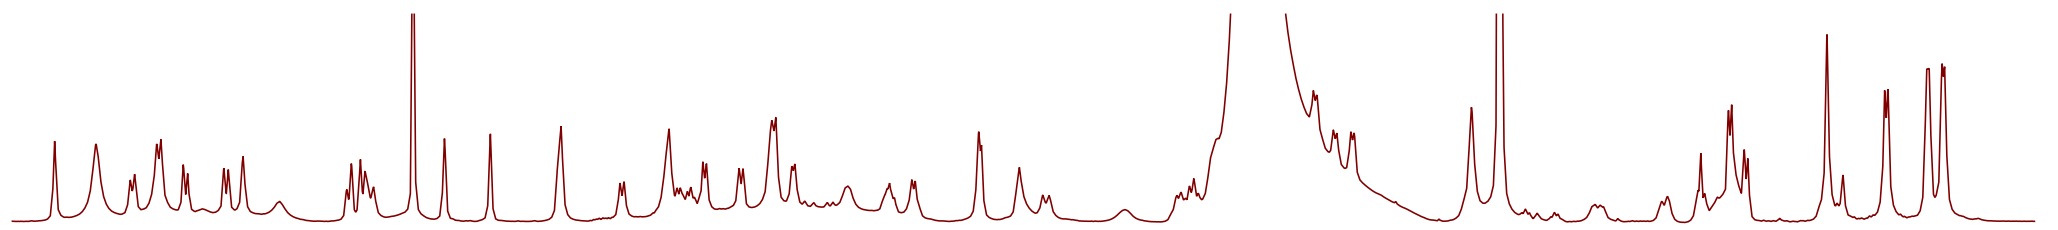

SY-IV-067-G4-pentenoyl-vancomycin-HSQC

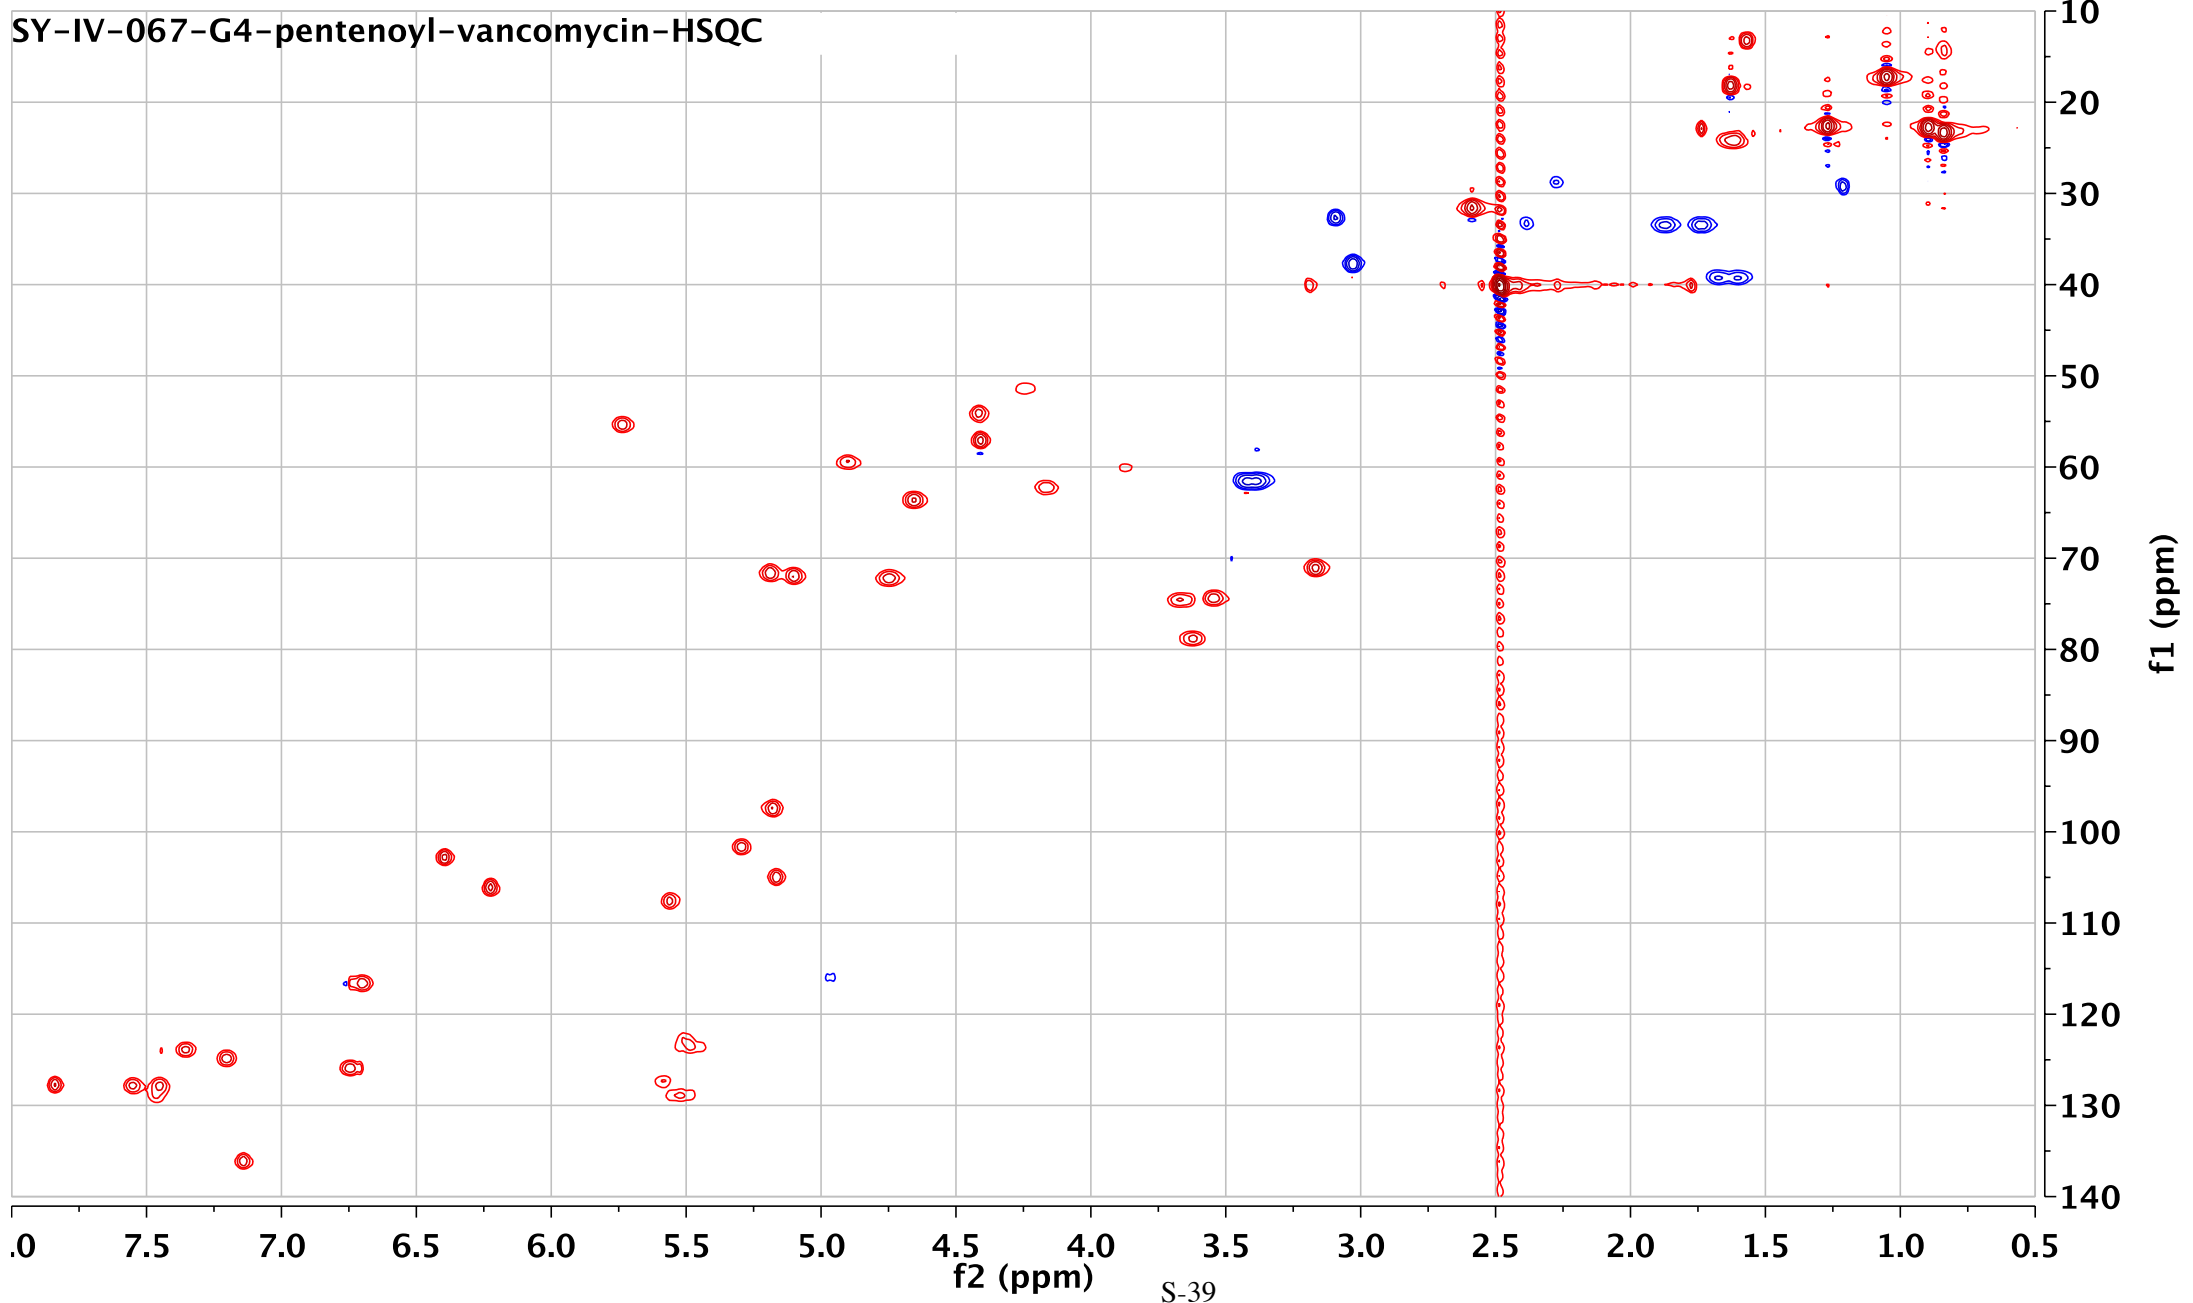

SY-IV-059-G4-adipoyl-CO2Me-vancomycin

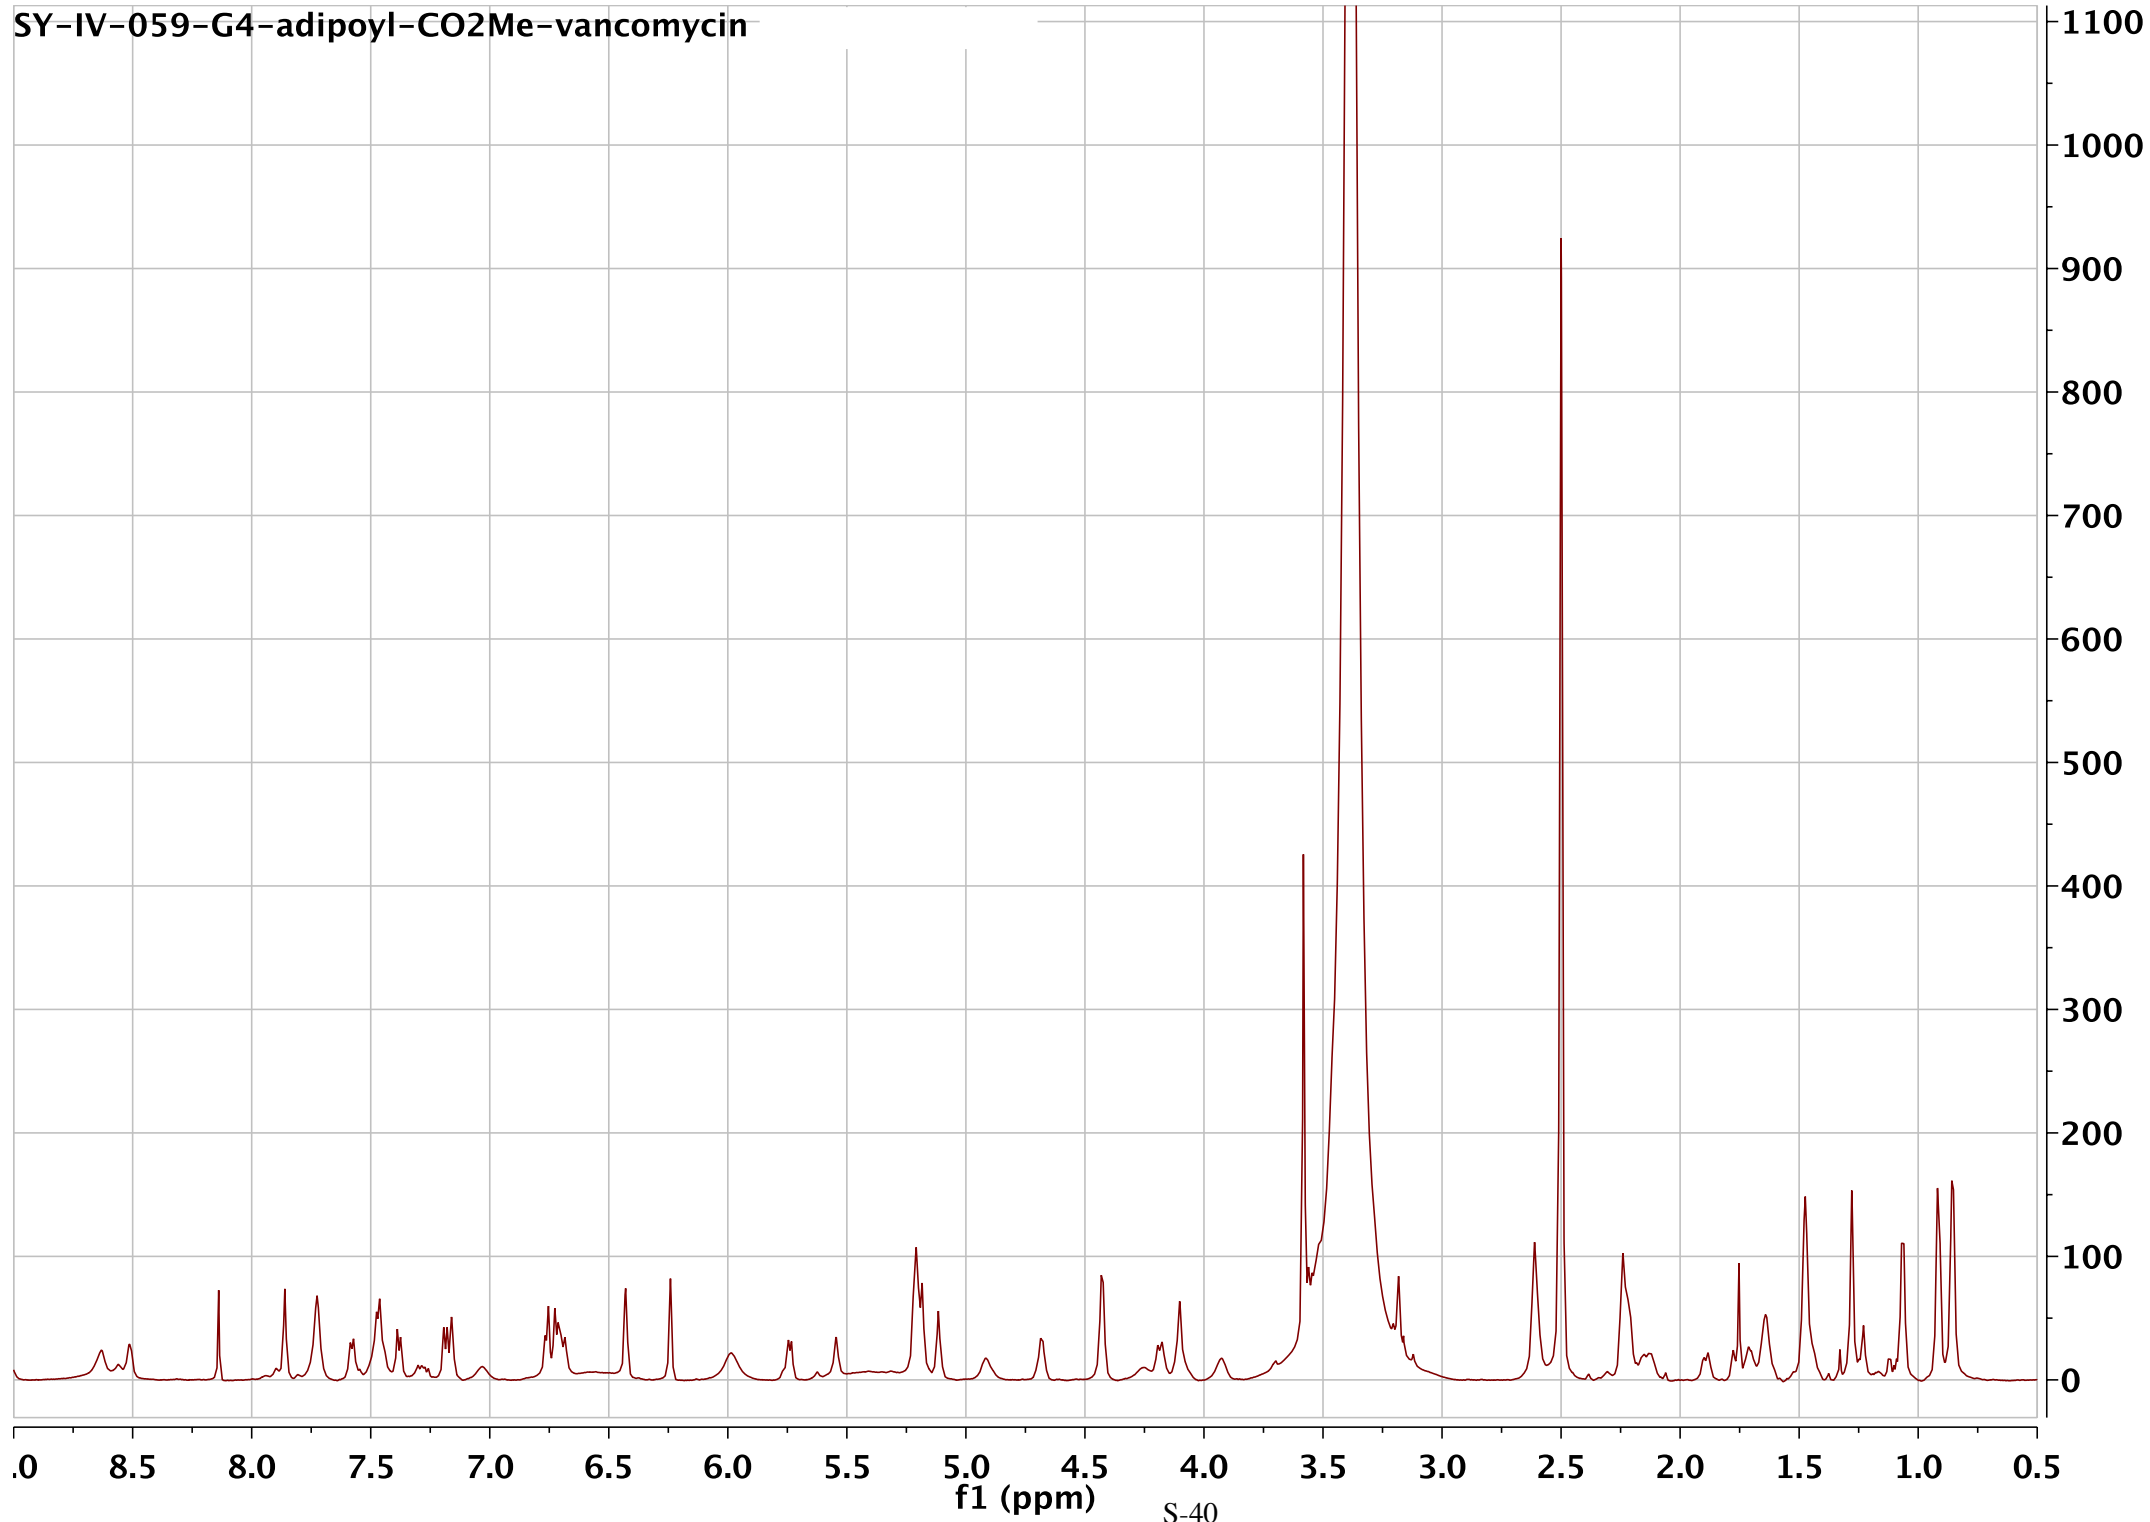

S-40



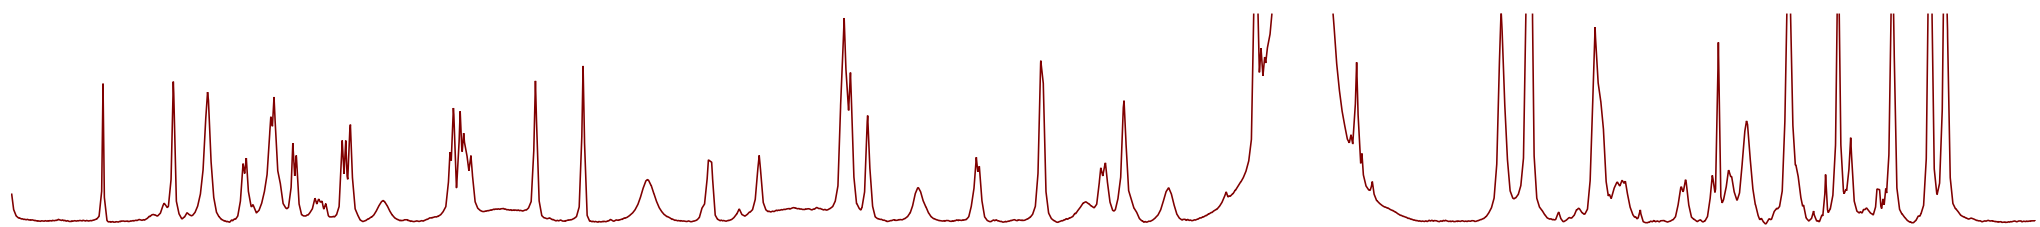

SY-IV-059-G4-adipoyl-CO2Me-vancomycin - HSQC

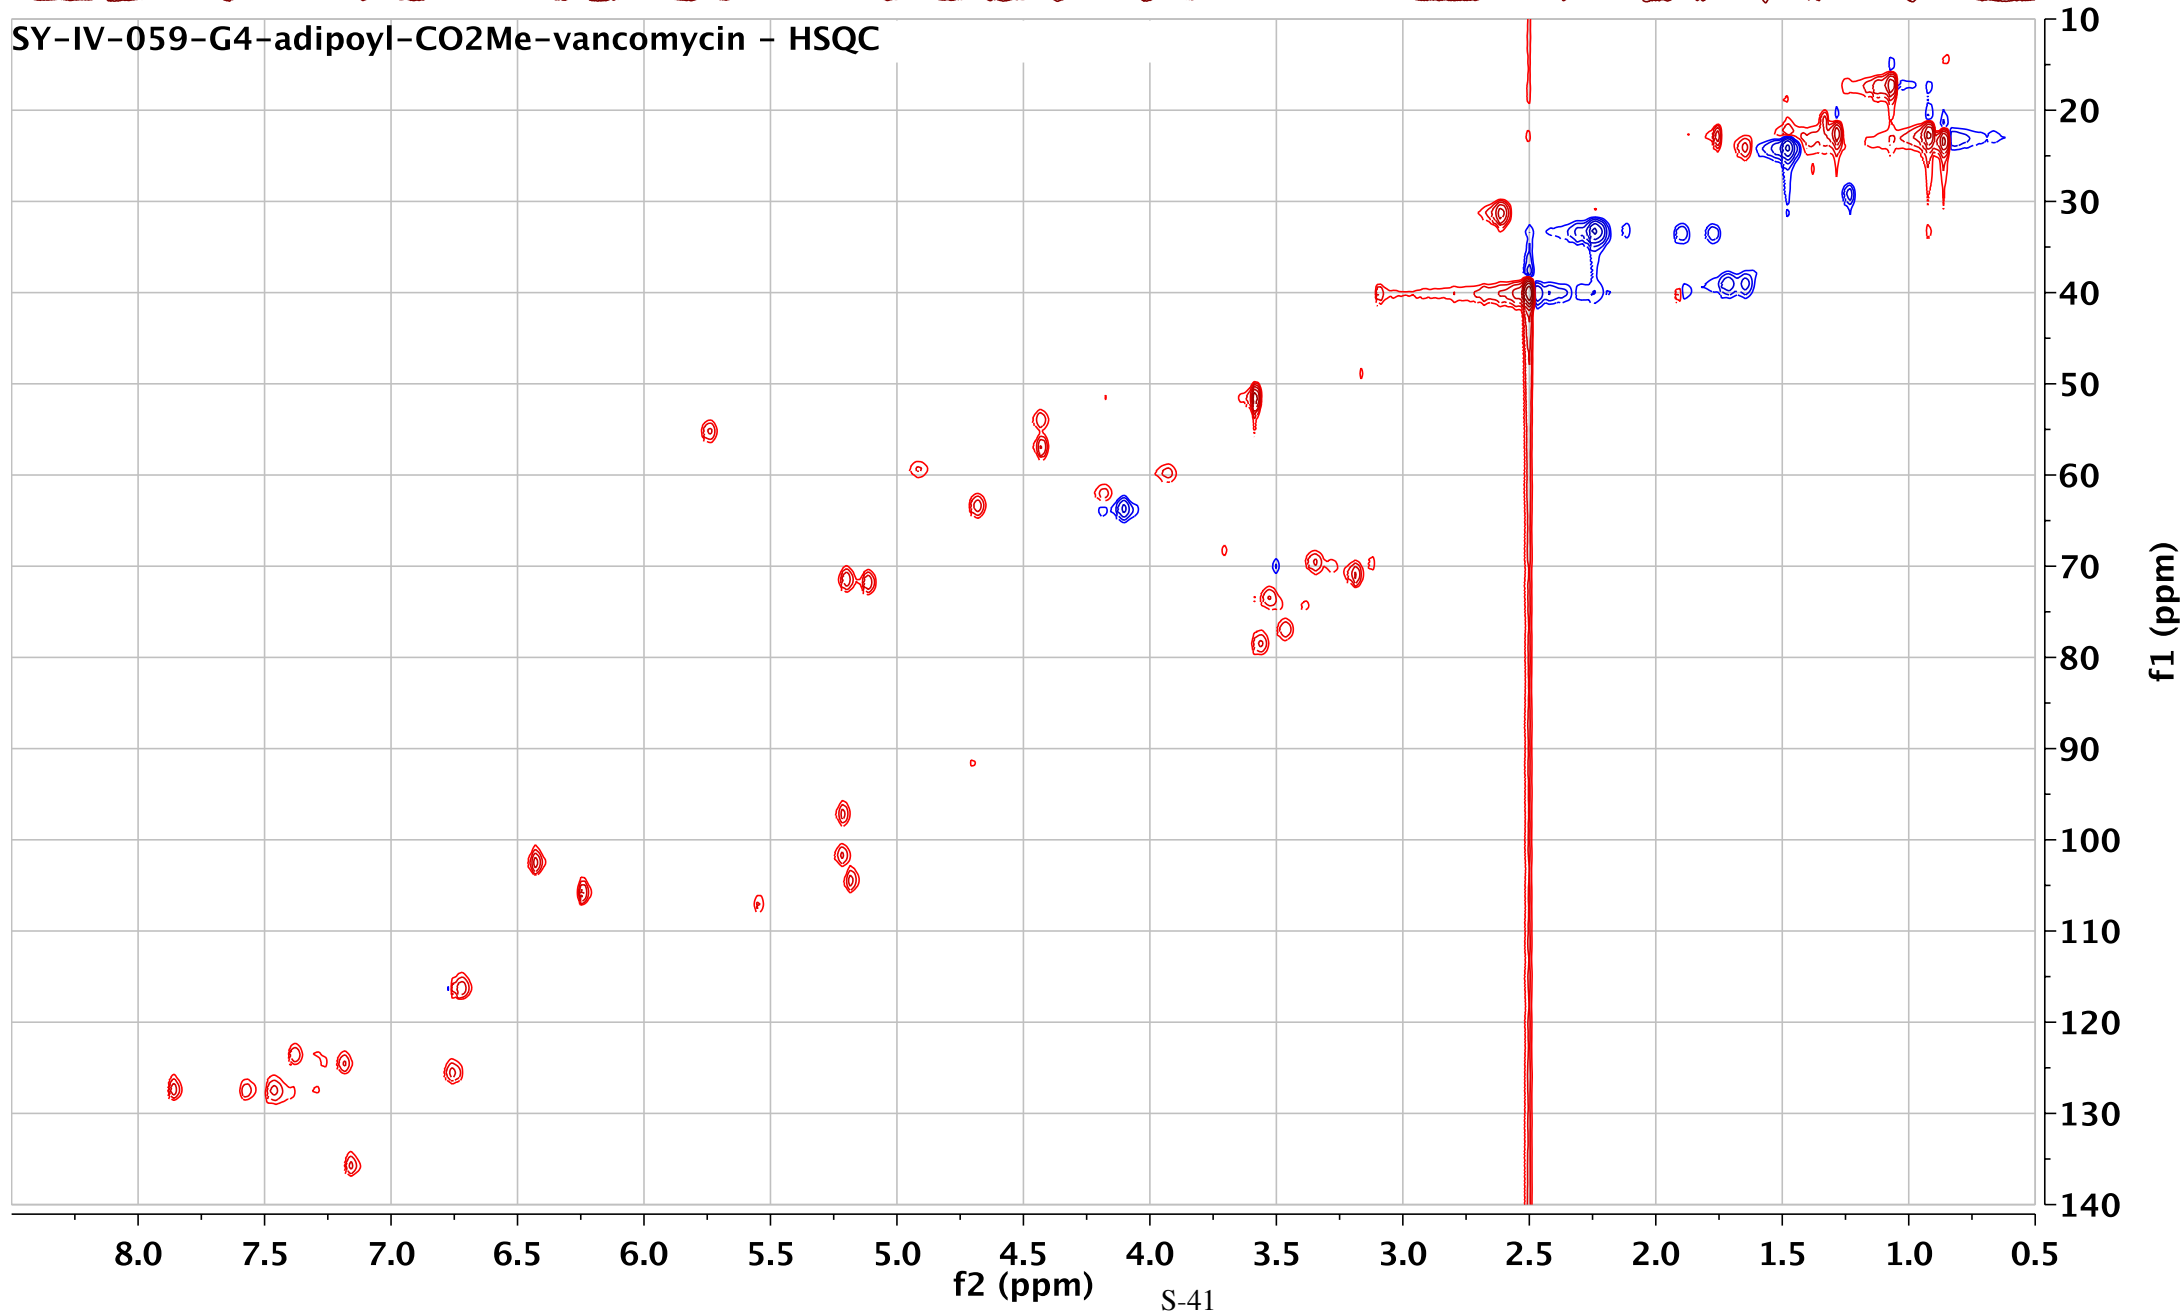

Supplement: NIHMS671039-supplement-Supporting_Online_Material.pdf [file NIHMS671039-supplement-Supporting_Online_Material.pdf]
